# Supplementary material for: A Meta-Analysis of Biostimulant Yield Effectiveness in Field Trials
Source: Front Plant Sci. 2022 Apr 14;13:836702. doi: 10.3389/fpls.2022.836702 (PMC9047501; doi:10.3389/fpls.2022.836702)
Supplement: Supplementary file 3 [file Data_Sheet_2.XLSX]

## Sheet: Supplementary Data 2
Supplementary Data 2. Dataset collected for meta-analysis.
pair	study	Author	Year	doi	crop	CropCategory	Climate	ClimateMain	ClimatePrecipitation	location	country	longitude	lantitude	replicates	TotalN	Nppm	Pppm	PppmLevel	Kppm	KppmLevel	ECe	ECeLevel	pHH2O	pHH2OL	SoilTexture	product	PBsCategory	commercial	method	dose	ifdoseresponse	Frequency	CtrlFreshYield	CtrlFreshYieldSD	TreatmentFreshYield	TreatmentFreshYieldSD	ContinusStudy
1	1	El-Serafy R S	2020	101016/jscienta2020109209	fennel	Others	BWh	Arid	Desert	Cairo	Egypt	31.2357	30.0444	3							1.6725	Nonsaline	7.99816	Moderately alkaline	Sandy loam	MLE	PE	0	Foliar	0.75	1	2	0.187843	0.009921	0.209449	0.012788	0
2	1	El-Serafy R S	2020	101016/jscienta2020109209	fennel	Others	BWh	Arid	Desert	Cairo	Egypt	31.2357	30.0444	3							1.6725	Nonsaline	7.99816	Moderately alkaline	Sandy loam	MLE	PE	0	Foliar	1	1	2	0.187843	0.009921	0.217386	0.008157	0
3	2	Wadas W	2019	1015666/aeer/1706_1321913230	potato	Root/tuber crops	Dfb	Boreal	Fully humid	Siedlce	Poland	22.2902	52.1676	3											Sandy loam	Bio-algeen S90	SWE	1	Foliar	1	0	2	3.949	0.37555	3.896	0.37051	1
4	2	Wadas W	2019	1015666/aeer/1706_1321913230	potato	Root/tuber crops	Dfb	Boreal	Fully humid	Siedlce	Poland	22.2902	52.1676	3											Sandy loam	Bio-algeen S90	SWE	1	Foliar	1	0	2	2.975	0.282923	3.464	0.329426	2
5	2	Wadas W	2019	1015666/aeer/1706_1321913230	potato	Root/tuber crops	Dfb	Boreal	Fully humid	Siedlce	Poland	22.2902	52.1676	3											Sandy loam	Bio-algeen S90	SWE	1	Foliar	1	0	2	2.934	0.279023	3.062	0.291196	3
6	2	Wadas W	2019	1015666/aeer/1706_1321913230	potato	Root/tuber crops	Dfb	Boreal	Fully humid	Siedlce	Poland	22.2902	52.1676	3											Sandy loam	Kelpak SL	SWE	1	Foliar	1	0	2	3.949	0.37555	4.022	0.382492	1
7	2	Wadas W	2019	1015666/aeer/1706_1321913230	potato	Root/tuber crops	Dfb	Boreal	Fully humid	Siedlce	Poland	22.2902	52.1676	3											Sandy loam	Kelpak SL	SWE	1	Foliar	1	0	2	2.975	0.282923	3.412	0.324481	2
8	2	Wadas W	2019	1015666/aeer/1706_1321913230	potato	Root/tuber crops	Dfb	Boreal	Fully humid	Siedlce	Poland	22.2902	52.1676	3											Sandy loam	Kelpak SL	SWE	1	Foliar	1	0	2	2.934	0.279023	3.062	0.291196	3
9	2	Wadas W	2019	1015666/aeer/1706_1321913230	potato	Root/tuber crops	Dfb	Boreal	Fully humid	Siedlce	Poland	22.2902	52.1676	3											Sandy loam	HumiPlant	HFA	1	Foliar	1	0	2	3.949	0.37555	4.143	0.393999	1
10	2	Wadas W	2019	1015666/aeer/1706_1321913230	potato	Root/tuber crops	Dfb	Boreal	Fully humid	Siedlce	Poland	22.2902	52.1676	3											Sandy loam	HumiPlant	HFA	1	Foliar	1	0	2	2.975	0.282923	3.161	0.300611	2
11	2	Wadas W	2019	1015666/aeer/1706_1321913230	potato	Root/tuber crops	Dfb	Boreal	Fully humid	Siedlce	Poland	22.2902	52.1676	3											Sandy loam	HumiPlant	HFA	1	Foliar	1	0	2	2.934	0.279023	3.283	0.312213	3
12	3	Taskos D	2019	101016/jscienta201902030	grape	Fruits	Cfa	Warm temperate	Fully humid	Goumenissa	Greece	22.4511	40.9469	4												AZAL5	SWE	1	Foliar	0.2	1	4	1.94686	0.341745	1.89173	0.341745	1
13	3	Taskos D	2019	101016/jscienta201902030	grape	Fruits	Cfa	Warm temperate	Fully humid	Goumenissa	Greece	22.4511	40.9469	3												AZAL5	SWE	1	Foliar	1	1	4	1.94686	0.341745	2.10119	0.352769	2
14	4	Zarzecka K	2020	103390/agriculture10020050	potato	Root/tuber crops	Dfb	Boreal	Fully humid	Wojnow	Poland	22.5774	52.2161	3			68.6	Optimal	99.6	Medium			7.03514	Neutral	Sandy loam	Kelpak	SWE	1	Foliar	1	0	1	3.591	0.341504	4.465	0.424621	1
15	4	Zarzecka K	2020	103390/agriculture10020052	potato	Root/tuber crops	Dfb	Boreal	Fully humid	Wojnow	Poland	22.5774	52.2161	3			68.6	Optimal	99.6	Medium			7.03514	Neutral	Sandy loam	Kelpak	SWE	1	Foliar	1	0	1	3.393	0.322674	3.358	0.319346	2
16	4	Zarzecka K	2020	103390/agriculture10020054	potato	Root/tuber crops	Dfb	Boreal	Fully humid	Wojnow	Poland	22.5774	52.2161	3			68.6	Optimal	99.6	Medium			7.03514	Neutral	Sandy loam	Kelpak	SWE	1	Foliar	1	0	1	2.876	0.273508	3.096	0.29443	3
17	5	Pohl A	2019	1015835/nbha47311468	eggplant	Vegetables	Cfb	Warm temperate	Fully humid	Krakow	Poland	19.945	50.0647	3									7.17857	Neutral		Göemar BM-86	SWE	1	Foliar	1	0	3	4.59	0.39	4.18	0.26	1
18	5	Pohl A	2019	1015835/nbha47311468	eggplant	Vegetables	Cfb	Warm temperate	Fully humid	Krakow	Poland	19.945	50.0647	3									7.17857	Neutral		Göemar BM-87	SWE	1	Foliar	1	0	3	3.61	0.33	3.93	0.37	1
19	5	Pohl A	2019	1015835/nbha47311468	eggplant	Vegetables	Cfb	Warm temperate	Fully humid	Krakow	Poland	19.945	50.0647	3									7.17857	Neutral		Göemar BM-88	SWE	1	Foliar	1	0	3	2.54	0.45	3.26	0.31	1
20	5	Pohl A	2019	1015835/nbha47311468	eggplant	Vegetables	Cfb	Warm temperate	Fully humid	Krakow	Poland	19.945	50.0647	3									7.17857	Neutral		Göemar BM-89	SWE	1	Foliar	1	0	3	2.54	0.36	3.38	0.37	1
21	5	Pohl A	2019	1015835/nbha47311468	eggplant	Vegetables	Cfb	Warm temperate	Fully humid	Krakow	Poland	19.945	50.0647	3									7.17857	Neutral		Göemar BM-90	SWE	1	Foliar	1	0	3	3.67	0.51	4.04	0.25	1
22	5	Pohl A	2019	1015835/nbha47311468	eggplant	Vegetables	Cfb	Warm temperate	Fully humid	Krakow	Poland	19.945	50.0647	3									7.17857	Neutral		Göemar BM-91	SWE	1	Foliar	1	0	3	3.11	0.51	3.81	0.47	1
23	5	Pohl A	2019	1015835/nbha47311468	eggplant	Vegetables	Cfb	Warm temperate	Fully humid	Krakow	Poland	19.945	50.0647	3									7.17857	Neutral		Göemar BM-92	SWE	1	Foliar	1	0	3	3.14	0.28	3.2	0.21	2
24	5	Pohl A	2019	1015835/nbha47311468	eggplant	Vegetables	Cfb	Warm temperate	Fully humid	Krakow	Poland	19.945	50.0647	3									7.17857	Neutral		Göemar BM-93	SWE	1	Foliar	1	0	3	2.68	0.26	3.72	0.33	2
25	5	Pohl A	2019	1015835/nbha47311468	eggplant	Vegetables	Cfb	Warm temperate	Fully humid	Krakow	Poland	19.945	50.0647	3									7.17857	Neutral		Göemar BM-94	SWE	1	Foliar	1	0	3	1.6	0.24	2.51	0.11	2
26	5	Pohl A	2019	1015835/nbha47311468	eggplant	Vegetables	Cfb	Warm temperate	Fully humid	Krakow	Poland	19.945	50.0647	3									7.17857	Neutral		Göemar BM-95	SWE	1	Foliar	1	0	3	1.84	0.11	2.29	0.32	2
27	5	Pohl A	2019	1015835/nbha47311468	eggplant	Vegetables	Cfb	Warm temperate	Fully humid	Krakow	Poland	19.945	50.0647	3									7.17857	Neutral		Göemar BM-96	SWE	1	Foliar	1	0	3	2.49	0.17	2.57	0.36	2
28	5	Pohl A	2019	1015835/nbha47311468	eggplant	Vegetables	Cfb	Warm temperate	Fully humid	Krakow	Poland	19.945	50.0647	3									7.17857	Neutral		Göemar BM-97	SWE	1	Foliar	1	0	3	2.27	0.28	2.98	0.39	2
29	6	Hanan M. El-Hoseiny	2020	10.21273/HORTSCI15053-21	Mango	Fruits	BWh	Arid	Desert	Sharkeya Governorate	Egypt	31.7195	30.7327	3	0.074		5.5	Very low	4.59	Very low	2.895	Slightly saline	8.10982	Moderately alkaline	Sand		HFA	1	Foliar	0.33	1	3	0.269388	0.044449	0.728571	0.120214	1
30	6	Hanan M. El-Hoseiny	2020	10.21273/HORTSCI15053-23	Mango	Fruits	BWh	Arid	Desert	Sharkeya Governorate	Egypt	31.7195	30.7327	3	0.074		5.5	Very low	4.59	Very low	2.895	Slightly saline	8.10982	Moderately alkaline	Sand		HFA	1	Foliar	0.67	1	3	0.269388	0.044449	0.765306	0.126276	1
31	6	Hanan M. El-Hoseiny	2020	10.21273/HORTSCI15053-25	Mango	Fruits	BWh	Arid	Desert	Sharkeya Governorate	Egypt	31.7195	30.7327	3	0.074		5.5	Very low	4.59	Very low	2.895	Slightly saline	8.10982	Moderately alkaline	Sand		HFA	1	Foliar	1	1	3	0.269388	0.044449	0.787755	0.12998	1
32	6	Hanan M. El-Hoseiny	2020	10.21273/HORTSCI15053-27	Mango	Fruits	BWh	Arid	Desert	Sharkeya Governorate	Egypt	31.7195	30.7327	3	0.074		5.5	Very low	4.59	Very low	2.895	Slightly saline	8.10982	Moderately alkaline	Sand		HFA	1	Foliar	0.33	1	3	0.597959	0.0986633	0.742857	0.122571	2
33	6	Hanan M. El-Hoseiny	2020	10.21273/HORTSCI15053-29	Mango	Fruits	BWh	Arid	Desert	Sharkeya Governorate	Egypt	31.7195	30.7327	3	0.074		5.5	Very low	4.59	Very low	2.895	Slightly saline	8.10982	Moderately alkaline	Sand		HFA	1	Foliar	0.67	1	3	0.597959	0.0986633	0.779592	0.128633	2
34	6	Hanan M. El-Hoseiny	2020	10.21273/HORTSCI15053-31	Mango	Fruits	BWh	Arid	Desert	Sharkeya Governorate	Egypt	31.7195	30.7327	3	0.074		5.5	Very low	4.59	Very low	2.895	Slightly saline	8.10982	Moderately alkaline	Sand		HFA	1	Foliar	1	1	3	0.597959	0.0986633	0.793878	0.13099	2
35	7	Lenssen A W	2019	102134/cftm2018070053	soybean	Legumes	Cfb	Warm temperate	Fully humid	Boone	USA	-81.6746	36.2168	4			61.5	Optimal	242	Optimal			6.64584	Neutral	Loam	Yoeld Igniter	HFA	1	Foliar	1	0	1	0.423121	0.0566982	0.477146	0.0639376	1
36	7	Lenssen A W	2019	102134/cftm2018070053	soybean	Legumes	Cfb	Warm temperate	Fully humid	Boone	USA	-81.6746	36.2168	4			61.5	Optimal	242	Optimal			6.64584	Neutral	Loam	Yoeld Igniter	HFA	1	Foliar	1	0	1	0.423121	0.0566982	0.453384	0.0607534	1
37	7	Lenssen A W	2019	102134/cftm2018070053	soybean	Legumes	Cfb	Warm temperate	Fully humid	Boone	USA	-81.6746	36.2168	4			61.5	Optimal	242	Optimal			6.64584	Neutral	Loam	Yoeld Igniter	HFA	1	Foliar	1	0	1	0.423121	0.0566982	0.507969	0.0680679	1
38	7	Lenssen A W	2019	102134/cftm2018070053	soybean	Legumes	Cfb	Warm temperate	Fully humid	Boone	USA	-81.6746	36.2168	4			61.5	Optimal	242	Optimal			6.64584	Neutral	Loam	Yoeld Igniter	HFA	1	Foliar	1	0	1	0.423121	0.0566982	0.48275	0.0646885	0
39	7	Lenssen A W	2019	102134/cftm2018070053	soybean	Legumes	Dfa	Boreal	Fully humid	Chariton	USA	-93.314	41.02	4			12	Very low	171.5	Optimal			6.64584	Neutral	Loam	Yoeld Igniter	HFA	1	Foliar	1	0	1	0.28167	0.0377437	0.310812	0.0416488	1
40	7	Lenssen A W	2019	102134/cftm2018070053	soybean	Legumes	Dfa	Boreal	Fully humid	Chariton	USA	-93.314	41.02	4			12	Very low	171.5	Optimal			6.64584	Neutral	Loam	Yoeld Igniter	HFA	1	Foliar	1	0	1	0.28167	0.0377437	0.270349	0.0362268	1
41	7	Lenssen A W	2019	102134/cftm2018070053	soybean	Legumes	Dfa	Boreal	Fully humid	Chariton	USA	-93.314	41.02	4			12	Very low	171.5	Optimal			6.64584	Neutral	Loam	Yoeld Igniter	HFA	1	Foliar	1	0	1	0.28167	0.0377437	0.273039	0.0365872	1
42	7	Lenssen A W	2019	102134/cftm2018070053	soybean	Legumes	Dfa	Boreal	Fully humid	Chariton	USA	-93.314	41.02	4			12	Very low	171.5	Optimal			6.64584	Neutral	Loam	Yoeld Igniter	HFA	1	Foliar	1	0	1	0.28167	0.0377437	0.297137	0.0398164	1
43	7	Lenssen A W	2019	102134/cftm2018070053	soybean	Legumes	Dfa	Boreal	Fully humid	Ames	USA	-93.62	42.034	4			13	Very low	171.5	Optimal			6.64584	Neutral	Loam	Yoeld Igniter	HFA	1	Foliar	1	0	1	0.360802	0.0483474	0.332332	0.0445325	2
44	7	Lenssen A W	2019	102134/cftm2018070053	soybean	Legumes	Dfa	Boreal	Fully humid	Ames	USA	-93.62	42.034	4			13	Very low	171.5	Optimal			6.64584	Neutral	Loam	Yoeld Igniter	HFA	1	Foliar	1	0	1	0.360802	0.0483474	0.338048	0.0452985	2
45	7	Lenssen A W	2019	102134/cftm2018070053	soybean	Legumes	Dfa	Boreal	Fully humid	Ames	USA	-93.62	42.034	4			13	Very low	171.5	Optimal			6.64584	Neutral	Loam	Yoeld Igniter	HFA	1	Foliar	1	0	1	0.360802	0.0483474	0.335134	0.044908	2
46	7	Lenssen A W	2019	102134/cftm2018070053	soybean	Legumes	Dfa	Boreal	Fully humid	Ames	USA	-93.62	42.034	4			13	Very low	171.5	Optimal			6.64584	Neutral	Loam	Yoeld Igniter	HFA	1	Foliar	1	0	1	0.360802	0.0483474	0.326504	0.0437515	2
47	7	Lenssen A W	2019	102134/cftm2018070053	soybean	Legumes	Cfb	Warm temperate	Fully humid	Boone	USA	-81.6746	36.2168	4			42.5	Optimal	171.5	Optimal			6.64584	Neutral	Loam	Yoeld Igniter	HFA	1	Foliar	1	0	1	0.349145	0.0467854	0.335582	0.0449681	3
48	7	Lenssen A W	2019	102134/cftm2018070053	soybean	Legumes	Cfb	Warm temperate	Fully humid	Boone	USA	-81.6746	36.2168	4			42.5	Optimal	171.5	Optimal			6.64584	Neutral	Loam	Yoeld Igniter	HFA	1	Foliar	1	0	1	0.349145	0.0467854	0.330987	0.0443523	3
49	7	Lenssen A W	2019	102134/cftm2018070053	soybean	Legumes	Cfb	Warm temperate	Fully humid	Boone	USA	-81.6746	36.2168	4			42.5	Optimal	171.5	Optimal			6.64584	Neutral	Loam	Yoeld Igniter	HFA	1	Foliar	1	0	1	0.349145	0.0467854	0.357999	0.0479719	3
50	7	Lenssen A W	2019	102134/cftm2018070053	soybean	Legumes	Cfb	Warm temperate	Fully humid	Boone	USA	-81.6746	36.2168	4			42.5	Optimal	171.5	Optimal			6.64584	Neutral	Loam	Yoeld Igniter	HFA	1	Foliar	1	0	1	0.349145	0.0467854	0.323926	0.043406	3
51	8	Kocira S	2019	103390/agronomy9020093	soybean	Legumes	Dfb	Boreal	Fully humid	Perespa	Poland	23.636	50.6577	4			126	Optimal	153	Optimal			8.63334	Strongly alkaline		Kelpak	SWE	1	Foliar	0.7	1	1	0.3267	0.0437778	0.3677	0.0492718	1
52	8	Kocira S	2019	103390/agronomy9020093	soybean	Legumes	Dfb	Boreal	Fully humid	Perespa	Poland	23.636	50.6577	4			126	Optimal	153	Optimal			8.63334	Strongly alkaline		Kelpak	SWE	1	Foliar	0.7	1	2	0.3267	0.0437778	0.3805	0.050987	1
53	8	Kocira S	2019	103390/agronomy9020093	soybean	Legumes	Dfb	Boreal	Fully humid	Perespa	Poland	23.636	50.6577	4			126	Optimal	153	Optimal			8.63334	Strongly alkaline		Kelpak	SWE	1	Foliar	1	1	1	0.3267	0.0437778	0.3758	0.0503572	1
54	8	Kocira S	2019	103390/agronomy9020093	soybean	Legumes	Dfb	Boreal	Fully humid	Perespa	Poland	23.636	50.6577	4			126	Optimal	153	Optimal			8.63334	Strongly alkaline		Kelpak	SWE	1	Foliar	1	1	2	0.3267	0.0437778	0.4137	0.0554358	1
55	8	Kocira S	2019	103390/agronomy9020093	soybean	Legumes	Dfb	Boreal	Fully humid	Perespa	Poland	23.636	50.6577	4			126	Optimal	153	Optimal			8.63334	Strongly alkaline		Kelpak	SWE	1	Foliar	0.7	1	1	0.2664	0.0356976	0.3636	0.0487224	2
56	8	Kocira S	2019	103390/agronomy9020093	soybean	Legumes	Dfb	Boreal	Fully humid	Perespa	Poland	23.636	50.6577	4			126	Optimal	153	Optimal			8.63334	Strongly alkaline		Kelpak	SWE	1	Foliar	0.7	1	2	0.2664	0.0356976	0.3876	0.0519384	2
57	8	Kocira S	2019	103390/agronomy9020093	soybean	Legumes	Dfb	Boreal	Fully humid	Perespa	Poland	23.636	50.6577	4			126	Optimal	153	Optimal			8.63334	Strongly alkaline		Kelpak	SWE	1	Foliar	1	1	1	0.2664	0.0356976	0.3874	0.0519116	2
58	8	Kocira S	2019	103390/agronomy9020093	soybean	Legumes	Dfb	Boreal	Fully humid	Perespa	Poland	23.636	50.6577	4			126	Optimal	153	Optimal			8.63334	Strongly alkaline		Kelpak	SWE	1	Foliar	1	1	2	0.2664	0.0356976	0.4171	0.0558914	2
59	8	Kocira S	2019	103390/agronomy9020093	soybean	Legumes	Dfb	Boreal	Fully humid	Perespa	Poland	23.636	50.6577	4			126	Optimal	153	Optimal			8.63334	Strongly alkaline		Kelpak	SWE	1	Foliar	0.7	1	1	0.3262	0.0437108	0.3767	0.0504778	3
60	8	Kocira S	2019	103390/agronomy9020093	soybean	Legumes	Dfb	Boreal	Fully humid	Perespa	Poland	23.636	50.6577	4			126	Optimal	153	Optimal			8.63334	Strongly alkaline		Kelpak	SWE	1	Foliar	0.7	1	2	0.3262	0.0437108	0.3852	0.0516168	3
61	8	Kocira S	2019	103390/agronomy9020093	soybean	Legumes	Dfb	Boreal	Fully humid	Perespa	Poland	23.636	50.6577	4			126	Optimal	153	Optimal			8.63334	Strongly alkaline		Kelpak	SWE	1	Foliar	1	1	1	0.3262	0.0437108	0.3907	0.0523538	3
62	8	Kocira S	2019	103390/agronomy9020093	soybean	Legumes	Dfb	Boreal	Fully humid	Perespa	Poland	23.636	50.6577	4			126	Optimal	153	Optimal			8.63334	Strongly alkaline		Kelpak	SWE	1	Foliar	1	1	2	0.3262	0.0437108	0.4198	0.0562532	3
63	9	Kocira S	2019	104067/S0718-58392019000100017	soybean	Legumes	Dfb	Boreal	Fully humid	Perespa	Poland	23.636	50.6577	4									8.63334	Strongly alkaline		Kelpak	SWE	1	Foliar	0.6	1	1	0.3267	0.0267	0.3415	0.0083	1
64	9	Kocira S	2019	104067/S0718-58392019000100017	soybean	Legumes	Dfb	Boreal	Fully humid	Perespa	Poland	23.636	50.6577	4									8.63334	Strongly alkaline		Kelpak	SWE	1	Foliar	0.6	1	2	0.3267	0.0267	0.3523	0.0116	1
65	9	Kocira S	2019	104067/S0718-58392019000100017	soybean	Legumes	Dfb	Boreal	Fully humid	Perespa	Poland	23.636	50.6577	4									8.63334	Strongly alkaline		Kelpak	SWE	1	Foliar	1	1	1	0.3267	0.0267	0.3178	0.0099	1
66	9	Kocira S	2019	104067/S0718-58392019000100017	soybean	Legumes	Dfb	Boreal	Fully humid	Perespa	Poland	23.636	50.6577	4									8.63334	Strongly alkaline		Kelpak	SWE	1	Foliar	1	1	2	0.3267	0.0267	0.3923	0.0085	1
67	9	Kocira S	2019	104067/S0718-58392019000100017	soybean	Legumes	Dfb	Boreal	Fully humid	Perespa	Poland	23.636	50.6577	4									8.63334	Strongly alkaline		Kelpak	SWE	1	Foliar	0.6	1	1	0.2664	0.0218	0.3705	0.0083	2
68	9	Kocira S	2019	104067/S0718-58392019000100017	soybean	Legumes	Dfb	Boreal	Fully humid	Perespa	Poland	23.636	50.6577	4									8.63334	Strongly alkaline		Kelpak	SWE	1	Foliar	0.6	1	2	0.2664	0.0218	0.3703	0.0068	2
69	9	Kocira S	2019	104067/S0718-58392019000100017	soybean	Legumes	Dfb	Boreal	Fully humid	Perespa	Poland	23.636	50.6577	4									8.63334	Strongly alkaline		Kelpak	SWE	1	Foliar	1	1	1	0.2664	0.0218	0.365	0.0174	2
70	9	Kocira S	2019	104067/S0718-58392019000100017	soybean	Legumes	Dfb	Boreal	Fully humid	Perespa	Poland	23.636	50.6577	4									8.63334	Strongly alkaline		Kelpak	SWE	1	Foliar	1	1	2	0.2664	0.0218	0.3929	0.0062	2
71	9	Kocira S	2019	104067/S0718-58392019000100017	soybean	Legumes	Dfb	Boreal	Fully humid	Perespa	Poland	23.636	50.6577	4									8.63334	Strongly alkaline		Kelpak	SWE	1	Foliar	0.6	1	1	0.3262	0.0324	0.3865	0.0087	3
72	9	Kocira S	2019	104067/S0718-58392019000100017	soybean	Legumes	Dfb	Boreal	Fully humid	Perespa	Poland	23.636	50.6577	4									8.63334	Strongly alkaline		Kelpak	SWE	1	Foliar	0.6	1	2	0.3262	0.0324	0.3919	0.0146	3
73	9	Kocira S	2019	104067/S0718-58392019000100017	soybean	Legumes	Dfb	Boreal	Fully humid	Perespa	Poland	23.636	50.6577	4									8.63334	Strongly alkaline		Kelpak	SWE	1	Foliar	1	1	1	0.3262	0.0324	0.3987	0.0074	3
74	9	Kocira S	2019	104067/S0718-58392019000100017	soybean	Legumes	Dfb	Boreal	Fully humid	Perespa	Poland	23.636	50.6577	4									8.63334	Strongly alkaline		Kelpak	SWE	1	Foliar	1	1	2	0.3262	0.0324	0.4084	0.0155	3
75	10	Kpowski T	2019	10.18520/cs/v116/i6/1009-1015	wheat	Cereals	Cfb	Warm temperate	Fully humid	Kuyavian-Pomeranian	Poland	18.4834	53.1648	4			173	Optimal	180	Optimal			7.78301	Moderately alkaline		Protamil	PHs	1	Foliar	1	0	1	0.53	0.022525	0.59	0.025075	1
76	10	Kpowski T	2019	10.18520/cs/v116/i6/1009-1015	wheat	Cereals	Cfb	Warm temperate	Fully humid	Kuyavian-Pomeranian	Poland	18.4834	53.1648	4			173	Optimal	180	Optimal			7.78301	Moderately alkaline		Kelpak	SWE	1	Foliar	1	0	1	0.53	0.022525	0.632	0.02686	1
77	10	Kpowski T	2019	10.18520/cs/v116/i6/1009-1015	wheat	Cereals	Cfb	Warm temperate	Fully humid	Kuyavian-Pomeranian	Poland	18.4834	53.1648	4			173	Optimal	180	Optimal			7.78301	Moderately alkaline		Protamil	PHs	1	Foliar	1	0	1	0.576	0.02448	0.637	0.0270725	2
78	10	Kpowski T	2019	10.18520/cs/v116/i6/1009-1015	wheat	Cereals	Cfb	Warm temperate	Fully humid	Kuyavian-Pomeranian	Poland	18.4834	53.1648	4			173	Optimal	180	Optimal			7.78301	Moderately alkaline		Kelpak	SWE	1	Foliar	1	0	1	0.576	0.02448	0.664	0.02822	2
79	11	Khan S	2019	101016/jsajb201901007	wheat	Cereals	BSh	Arid	Steppe	Faisalabad	Pakistan	73.135	31.4504	3		0.52	9.46	Very low	114.08	Medium	3.2829	Slightly saline	7.83424	Moderately alkaline	Sandy clay loam	MLE	PE	0	Seed	1	0	1	0.3758	0.0071	0.4522	0.0064	0
80	11	Khan S	2019	101016/jsajb201901007	wheat	Cereals	BSh	Arid	Steppe	Faisalabad	Pakistan	73.135	31.4504	3		0.52	9.46	Very low	114.08	Medium	3.2829	Slightly saline	7.83424	Moderately alkaline	Sandy clay loam	MLE	PE	0	Seed	1	0	1	0.3228	0.0092	0.4157	0.0067	0
81	11	Khan S	2019	101016/jsajb201901007	wheat	Cereals	BSh	Arid	Steppe	Faisalabad	Pakistan	73.135	31.4504	3		0.52	9.46	Very low	114.08	Medium	3.2829	Slightly saline	7.83424	Moderately alkaline	Sandy clay loam	MLE	PE	0	Foliar	1	0	2	0.3758	0.012	0.501	0.0246	0
82	11	Khan S	2019	101016/jsajb201901007	wheat	Cereals	BSh	Arid	Steppe	Faisalabad	Pakistan	73.135	31.4504	3		0.52	9.46	Very low	114.08	Medium	3.2829	Slightly saline	7.83424	Moderately alkaline	Sandy clay loam	MLE	PE	0	Foliar	1	0	2	0.3728	0.0234	0.4391	0.008	0
83	12	Hamada A	2020	1021608/agro2019143961168	Clover	Others	BWh	Arid	Desert	Assiut	Egypt	31.1859	27.1783	3	0.72						1.5261	Nonsaline	8.20305	Moderately alkaline	Clay		HFA	0	Foliar	0.5	1	2	4.117	0.363943	4.268	0.377291	1
84	12	Hamada A	2020	1021608/agro2019143961170	Clover	Others	BWh	Arid	Desert	Assiut	Egypt	31.1859	27.1783	3	0.72						1.5261	Nonsaline	8.20305	Moderately alkaline	Clay		HFA	0	Foliar	1	1	2	4.117	0.363943	4.062	0.359081	1
85	12	Hamada A	2020	1021608/agro2019143961172	Clover	Others	BWh	Arid	Desert	Assiut	Egypt	31.1859	27.1783	3	0.72						1.5261	Nonsaline	8.20305	Moderately alkaline	Clay		HFA	0	Foliar	0.5	1	2	3.864	0.341578	3.752	0.331677	1
86	12	Hamada A	2020	1021608/agro2019143961174	Clover	Others	BWh	Arid	Desert	Assiut	Egypt	31.1859	27.1783	3	0.72						1.5261	Nonsaline	8.20305	Moderately alkaline	Clay		HFA	0	Foliar	1	1	2	3.864	0.341578	3.957	0.349799	1
87	12	Hamada A	2020	1021608/agro2019143961176	Clover	Others	BWh	Arid	Desert	Assiut	Egypt	31.1859	27.1783	3	0.72						1.5261	Nonsaline	8.20305	Moderately alkaline	Clay		HFA	0	Foliar	0.5	1	2	5.033	0.444917	5.285	0.467194	2
88	12	Hamada A	2020	1021608/agro2019143961178	Clover	Others	BWh	Arid	Desert	Assiut	Egypt	31.1859	27.1783	3	0.72						1.5261	Nonsaline	8.20305	Moderately alkaline	Clay		HFA	0	Foliar	1	1	2	5.033	0.444917	4.872	0.430685	2
89	12	Hamada A	2020	1021608/agro2019143961180	Clover	Others	BWh	Arid	Desert	Assiut	Egypt	31.1859	27.1783	3	0.72						1.5261	Nonsaline	8.20305	Moderately alkaline	Clay		HFA	0	Foliar	0.5	1	2	4.599	0.406552	4.585	0.405314	2
90	12	Hamada A	2020	1021608/agro2019143961182	Clover	Others	BWh	Arid	Desert	Assiut	Egypt	31.1859	27.1783	3	0.72						1.5261	Nonsaline	8.20305	Moderately alkaline	Clay		HFA	0	Foliar	1	1	2	4.599	0.406552	4.785	0.422994	2
91	12	Hamada A	2020	1021608/agro2019143961184	faba bean	Legumes	BWh	Arid	Desert	Assiut	Egypt	31.1859	27.1783	3	0.72						1.5261	Nonsaline	8.20305	Moderately alkaline	Clay		HFA	0	Foliar	0.5	1	2	0.085567	0.011466	0.092433	0.012386	1
92	12	Hamada A	2020	1021608/agro2019143961186	faba bean	Legumes	BWh	Arid	Desert	Assiut	Egypt	31.1859	27.1783	3	0.72						1.5261	Nonsaline	8.20305	Moderately alkaline	Clay		HFA	0	Foliar	1	1	2	0.085567	0.011466	0.106555	0.0142784	1
93	12	Hamada A	2020	1021608/agro2019143961188	faba bean	Legumes	BWh	Arid	Desert	Assiut	Egypt	31.1859	27.1783	3	0.72						1.5261	Nonsaline	8.20305	Moderately alkaline	Clay		HFA	0	Foliar	0.5	1	2	0.030333	0.00406462	0.035837	0.00480216	1
94	12	Hamada A	2020	1021608/agro2019143961190	faba bean	Legumes	BWh	Arid	Desert	Assiut	Egypt	31.1859	27.1783	3	0.72						1.5261	Nonsaline	8.20305	Moderately alkaline	Clay		HFA	0	Foliar	1	1	2	0.030333	0.00406462	0.037457	0.00501924	1
95	12	Hamada A	2020	1021608/agro2019143961188	faba bean	Legumes	BWh	Arid	Desert	Assiut	Egypt	31.1859	27.1783	3	0.72						1.5261	Nonsaline	8.20305	Moderately alkaline	Clay		HFA	0	Foliar	0.5	1	2	0.02625	0.0035175	0.031823	0.00426428	1
96	12	Hamada A	2020	1021608/agro2019143961190	faba bean	Legumes	BWh	Arid	Desert	Assiut	Egypt	31.1859	27.1783	3	0.72						1.5261	Nonsaline	8.20305	Moderately alkaline	Clay		HFA	0	Foliar	1	1	2	0.02625	0.0035175	0.033367	0.00447118	1
97	12	Hamada A	2020	1021608/agro2019143961192	faba bean	Legumes	BWh	Arid	Desert	Assiut	Egypt	31.1859	27.1783	3	0.72						1.5261	Nonsaline	8.20305	Moderately alkaline	Clay		HFA	0	Foliar	0.5	1	2	0.0883	0.0118322	0.09595	0.0128573	2
98	12	Hamada A	2020	1021608/agro2019143961194	faba bean	Legumes	BWh	Arid	Desert	Assiut	Egypt	31.1859	27.1783	3	0.72						1.5261	Nonsaline	8.20305	Moderately alkaline	Clay		HFA	0	Foliar	1	1	2	0.0883	0.0118322	0.108325	0.0145156	2
99	12	Hamada A	2020	1021608/agro2019143961196	faba bean	Legumes	BWh	Arid	Desert	Assiut	Egypt	31.1859	27.1783	3	0.72						1.5261	Nonsaline	8.20305	Moderately alkaline	Clay		HFA	0	Foliar	0.5	1	2	0.0331	0.0044354	0.03885	0.0052059	2
100	12	Hamada A	2020	1021608/agro2019143961198	faba bean	Legumes	BWh	Arid	Desert	Assiut	Egypt	31.1859	27.1783	3	0.72						1.5261	Nonsaline	8.20305	Moderately alkaline	Clay		HFA	0	Foliar	1	1	2	0.0331	0.0044354	0.039645	0.00531243	2
101	12	Hamada A	2020	1021608/agro2019143961200	faba bean	Legumes	BWh	Arid	Desert	Assiut	Egypt	31.1859	27.1783	3	0.72						1.5261	Nonsaline	8.20305	Moderately alkaline	Clay		HFA	0	Foliar	0.5	1	2	0.028775	0.00385585	0.034445	0.00461563	2
102	12	Hamada A	2020	1021608/agro2019143961202	faba bean	Legumes	BWh	Arid	Desert	Assiut	Egypt	31.1859	27.1783	3	0.72						1.5261	Nonsaline	8.20305	Moderately alkaline	Clay		HFA	0	Foliar	1	1	2	0.028775	0.00385585	0.035835	0.00480189	2
103	13	Frioni T	2019	101002/jsfa9913	grape	Fruits	Cfb	Warm temperate	Fully humid	Perugia	Italy	12.3908	43.1107	3											Loam	Acadian	SWE	1	Foliar	1	1	5	1.16	0.1914	1.26	0.2079	0
104	14	Farouk S	2019	101016/jagwat2019105807	wheat	Cereals	BWh	Arid	Desert	El-Nubaria	Egypt	30.6686	30.6991	3							0.35	Nonsaline	8.25428	Moderately alkaline	Sand		Si	0	Foliar	0.5	1	2	0.26	0.084	0.345	0.011	0
105	14	Farouk S	2019	101016/jagwat2019105807	wheat	Cereals	BWh	Arid	Desert	El-Nubaria	Egypt	30.6686	30.6991	3							0.35	Nonsaline	8.25428	Moderately alkaline	Sand		Chi	0	Foliar	1	1	2	0.26	0.084	0.333	0.046	0
106	14	Farouk S	2019	101016/jagwat2019105807	wheat	Cereals	BWh	Arid	Desert	El-Nubaria	Egypt	30.6686	30.6991	3							0.35	Nonsaline	8.25428	Moderately alkaline	Sand		Si	0	Foliar	0.5	1	2	0.318	0.084	0.386	0.072	0
107	14	Farouk S	2019	101016/jagwat2019105807	wheat	Cereals	BWh	Arid	Desert	El-Nubaria	Egypt	30.6686	30.6991	3							0.35	Nonsaline	8.25428	Moderately alkaline	Sand		Chi	0	Foliar	1	1	2	0.318	0.084	0.377	0.055	0
108	15	Elankavi S	2019		blackgram	Legumes	Cfb	Warm temperate	Fully humid	Perugia	India	12.3908	43.1107	3							0.7392	Nonsaline	6.69706	Neutral	Clay		HFA	0	Foliar	1	0	2	0.54605	0.0731707	0.78624	0.105356	0
109	15	Elankavi S	2019		blackgram	Legumes	Cfb	Warm temperate	Fully humid	Perugia	India	12.3908	43.1107	3							0.7392	Nonsaline	6.69706	Neutral	Clay		HFA	0	Foliar	1	0	2	0.59682	0.0799739	0.88505	0.118597	0
110	15	Elankavi S	2019		blackgram	Legumes	Cfb	Warm temperate	Fully humid	Perugia	India	12.3908	43.1107	3							0.7392	Nonsaline	6.69706	Neutral	Clay		HFA	0	Foliar	1	0	2	0.66122	0.0886035	0.93422	0.125185	0
111	16	Di Mola I	2020	103390/plants8110523	Rocket	Vegetables	Csa	Warm temperate	Summer dry	ples	Italy	14.347	40.8518	3	0.11		127.2	Optimal	478.1	Optimal	1.3614	Nonsaline	6.60486	Neutral	Sand	Auxym	PE	1	Foliar	1	0	4	1.009	0.0975703	1.371	0.132576	0
112	16	Di Mola I	2020	103390/plants8110525	Rocket	Vegetables	Csa	Warm temperate	Summer dry	ples	Italy	14.347	40.8518	3	0.11		127.2	Optimal	478.1	Optimal	1.3614	Nonsaline	6.60486	Neutral	Sand	Trainer	PHs	1	Foliar	1	0	4	1.009	0.0975703	1.418	0.137121	0
113	17	Di Mola I	2020	103390/agronomy9100572	Rocket	Vegetables	Csa	Warm temperate	Summer dry	ples	Italy	14.347	40.8518	3	0.12	19	136.7	Optimal	515.2	Optimal	1.2882	Nonsaline	6.54		Sand	Kelpak	SWE	1	Foliar	1	0	5	2.157	0.11	2.449	0.348	0
114	17	Di Mola I	2020	103390/agronomy9100574	Rocket	Vegetables	Csa	Warm temperate	Summer dry	ples	Italy	14.347	40.8518	3	0.12	19	136.7	Optimal	515.2	Optimal	1.2882	Nonsaline	6.54		Sand	Auxym	PE	1	Foliar	1	0	5	2.157	0.11	2.602	0.32	0
115	17	Di Mola I	2020	103390/agronomy9100576	Rocket	Vegetables	Csa	Warm temperate	Summer dry	ples	Italy	14.347	40.8518	3	0.12	19	136.7	Optimal	515.2	Optimal	1.2882	Nonsaline	6.54		Sand	Trainer	PHs	1	Foliar	1	0	5	2.157	0.11	2.616	0.348	0
116	18	Caruso G	2019	103390/agronomy9090505	tomato	Vegetables	Csa	Warm temperate	Summer dry	ples	Italy	14.347	40.8518	3	0.094		63.9	Optimal	1800	Optimal	0.7392	Nonsaline			Sandy loam	Auxym	PE	1	Foliar	1	0	4	1.34288	0.129856	1.4848	0.14358	0
117	18	Caruso G	2019	103390/agronomy9090505	tomato	Vegetables	Csa	Warm temperate	Summer dry	ples	Italy	14.347	40.8518	3			63.9	Optimal	1800	Optimal	0.7392	Nonsaline			Sandy loam	Trainer	PHs	1	Foliar	1	0	4	1.34288	0.129856	1.6016	0.154875	0
118	19	Boselli M	2019	101016/jscienta2019108784	grape	Fruits	Cfb	Warm temperate	Fully humid	Valpolicella	Italy	10.887	45.5206	3											Clay loam	casein	PHs	0	Foliar	0.25	1	3	1.4025	0.231413	1.4718	0.242847	0
119	19	Boselli M	2019	101016/jscienta2019108784	grape	Fruits	Cfb	Warm temperate	Fully humid	Valpolicella	Italy	10.887	45.5206	3											Clay loam	casein	PHs	0	Foliar	1	1	3	1.4025	0.231413	1.8381	0.303287	0
120	19	Boselli M	2019	101016/jscienta2019108784	grape	Fruits	Cfb	Warm temperate	Fully humid	Valpolicella	Italy	10.887	45.5206	3											Clay loam	soybean	PHs	0	Foliar	0.25	1	3	1.4025	0.231413	1.5345	0.253192	0
121	19	Boselli M	2019	101016/jscienta2019108784	grape	Fruits	Cfb	Warm temperate	Fully humid	Valpolicella	Italy	10.887	45.5206	3											Clay loam	soybean	PHs	0	Foliar	1	1	3	1.4025	0.231413	1.6929	0.279329	0
122	19	Boselli M	2019	101016/jscienta2019108784	grape	Fruits	Cfb	Warm temperate	Fully humid	Valpolicella	Italy	10.887	45.5206	3											Clay loam	lupin	PHs	0	Foliar	0.25	1	3	1.4025	0.231413	1.7787	0.293486	0
123	19	Boselli M	2019	101016/jscienta2019108784	grape	Fruits	Cfb	Warm temperate	Fully humid	Valpolicella	Italy	10.887	45.5206	3											Clay loam	lupin	PHs	0	Foliar	1	1	3	1.4025	0.231413	1.41	0.23265	0
124	20	Kocira, Sławomir	2020	10.1038/s41598-020-74959-1	bean	Legumes	Dfb	Boreal	Fully humid	Perspa	Poland	23.636	50.6577	3		81	126	Optimal	153	Optimal			8.58211	Strongly alkaline		Kelpak SL	SWE	1	Foliar	0.7	1	1	0.248494	0.0060241	0.322289	0.0120482	1
125	20	Kocira, Sławomir	2020	10.1038/s41598-020-74959-3	bean	Legumes	Dfb	Boreal	Fully humid	Perspa	Poland	23.636	50.6577	3		81	126	Optimal	153	Optimal			8.58211	Strongly alkaline		Kelpak SL	SWE	1	Foliar	1	1	1	0.248494	0.0060241	0.323795	0.0120482	1
126	20	Kocira, Sławomir	2020	10.1038/s41598-020-74959-5	bean	Legumes	Dfb	Boreal	Fully humid	Perspa	Poland	23.636	50.6577	3		81	126	Optimal	153	Optimal			8.58211	Strongly alkaline		Kelpak SL	SWE	1	Foliar	0.7	1	2	0.248494	0.0060241	0.329819	0.0150602	1
127	20	Kocira, Sławomir	2020	10.1038/s41598-020-74959-7	bean	Legumes	Dfb	Boreal	Fully humid	Perspa	Poland	23.636	50.6577	3		81	126	Optimal	153	Optimal			8.58211	Strongly alkaline		Kelpak SL	SWE	1	Foliar	1	1	2	0.248494	0.0060241	0.338855	0.0150602	1
128	20	Kocira, Sławomir	2020	10.1038/s41598-020-74959-9	bean	Legumes	Dfb	Boreal	Fully humid	Perspa	Poland	23.636	50.6577	3		81	126	Optimal	153	Optimal			8.58211	Strongly alkaline		Terra Sorb Complex	PHs	1	Foliar	0.7	1	1	0.278614	0.0210843	0.35994	0.0451807	1
129	20	Kocira, Sławomir	2020	10.1038/s41598-020-74959-11	bean	Legumes	Dfb	Boreal	Fully humid	Perspa	Poland	23.636	50.6577	3		81	126	Optimal	153	Optimal			8.58211	Strongly alkaline		Terra Sorb Complex	PHs	1	Foliar	1	1	1	0.278614	0.0210843	0.319277	0.0240964	1
130	20	Kocira, Sławomir	2020	10.1038/s41598-020-74959-13	bean	Legumes	Dfb	Boreal	Fully humid	Perspa	Poland	23.636	50.6577	3		81	126	Optimal	153	Optimal			8.58211	Strongly alkaline		Terra Sorb Complex	PHs	1	Foliar	0.7	1	2	0.278614	0.0210843	0.332831	0.0210843	1
131	20	Kocira, Sławomir	2020	10.1038/s41598-020-74959-15	bean	Legumes	Dfb	Boreal	Fully humid	Perspa	Poland	23.636	50.6577	3		81	126	Optimal	153	Optimal			8.58211	Strongly alkaline		Terra Sorb Complex	PHs	1	Foliar	1	1	2	0.278614	0.0210843	0.371988	0.0150602	1
132	20	Kocira, Sławomir	2020	10.1038/s41598-020-74959-17	bean	Legumes	Dfb	Boreal	Fully humid	Perspa	Poland	23.636	50.6577	3		81	126	Optimal	153	Optimal			8.58211	Strongly alkaline		Kelpak SL	SWE	1	Foliar	0.7	1	1	0.317771	0.0180723	0.394578	0.0301205	2
133	20	Kocira, Sławomir	2020	10.1038/s41598-020-74959-19	bean	Legumes	Dfb	Boreal	Fully humid	Perspa	Poland	23.636	50.6577	3		81	126	Optimal	153	Optimal			8.58211	Strongly alkaline		Kelpak SL	SWE	1	Foliar	1	1	1	0.317771	0.0180723	0.335843	0.0210843	2
134	20	Kocira, Sławomir	2020	10.1038/s41598-020-74959-21	bean	Legumes	Dfb	Boreal	Fully humid	Perspa	Poland	23.636	50.6577	3		81	126	Optimal	153	Optimal			8.58211	Strongly alkaline		Kelpak SL	SWE	1	Foliar	0.7	1	2	0.317771	0.0180723	0.411145	0.120482	2
135	20	Kocira, Sławomir	2020	10.1038/s41598-020-74959-23	bean	Legumes	Dfb	Boreal	Fully humid	Perspa	Poland	23.636	50.6577	3		81	126	Optimal	153	Optimal			8.58211	Strongly alkaline		Kelpak SL	SWE	1	Foliar	1	1	2	0.317771	0.0180723	0.403614	0.0301205	2
136	20	Kocira, Sławomir	2020	10.1038/s41598-020-74959-25	bean	Legumes	Dfb	Boreal	Fully humid	Perspa	Poland	23.636	50.6577	3		81	126	Optimal	153	Optimal			8.58211	Strongly alkaline		Terra Sorb Complex	PHs	1	Foliar	0.7	1	1	0.25	0.00301205	0.259036	0.0060241	2
137	20	Kocira, Sławomir	2020	10.1038/s41598-020-74959-27	bean	Legumes	Dfb	Boreal	Fully humid	Perspa	Poland	23.636	50.6577	3		81	126	Optimal	153	Optimal			8.58211	Strongly alkaline		Terra Sorb Complex	PHs	1	Foliar	1	1	1	0.25	0.00301205	0.266566	0.0120482	2
138	20	Kocira, Sławomir	2020	10.1038/s41598-020-74959-29	bean	Legumes	Dfb	Boreal	Fully humid	Perspa	Poland	23.636	50.6577	3		81	126	Optimal	153	Optimal			8.58211	Strongly alkaline		Terra Sorb Complex	PHs	1	Foliar	0.7	1	2	0.25	0.00301205	0.284639	0.00903614	2
139	20	Kocira, Sławomir	2020	10.1038/s41598-020-74959-31	bean	Legumes	Dfb	Boreal	Fully humid	Perspa	Poland	23.636	50.6577	3		81	126	Optimal	153	Optimal			8.58211	Strongly alkaline		Terra Sorb Complex	PHs	1	Foliar	1	1	2	0.25	0.00301205	0.260542	0.0060241	2
140	20	Kocira, Sławomir	2020	10.1038/s41598-020-74959-33	bean	Legumes	Dfb	Boreal	Fully humid	Perspa	Poland	23.636	50.6577	3		81	126	Optimal	153	Optimal			8.58211	Strongly alkaline		Kelpak SL	SWE	1	Foliar	0.7	1	1	0.278614	0.0180723	0.331325	0.0060241	3
141	20	Kocira, Sławomir	2020	10.1038/s41598-020-74959-35	bean	Legumes	Dfb	Boreal	Fully humid	Perspa	Poland	23.636	50.6577	3		81	126	Optimal	153	Optimal			8.58211	Strongly alkaline		Kelpak SL	SWE	1	Foliar	1	1	1	0.278614	0.0180723	0.394578	0.0331325	3
142	20	Kocira, Sławomir	2020	10.1038/s41598-020-74959-37	bean	Legumes	Dfb	Boreal	Fully humid	Perspa	Poland	23.636	50.6577	3		81	126	Optimal	153	Optimal			8.58211	Strongly alkaline		Kelpak SL	SWE	1	Foliar	0.7	1	2	0.278614	0.0180723	0.381024	0.0210843	3
143	20	Kocira, Sławomir	2020	10.1038/s41598-020-74959-39	bean	Legumes	Dfb	Boreal	Fully humid	Perspa	Poland	23.636	50.6577	3		81	126	Optimal	153	Optimal			8.58211	Strongly alkaline		Kelpak SL	SWE	1	Foliar	1	1	2	0.278614	0.0180723	0.335843	0.0210843	3
144	20	Kocira, Sławomir	2020	10.1038/s41598-020-74959-41	bean	Legumes	Dfb	Boreal	Fully humid	Perspa	Poland	23.636	50.6577	3		81	126	Optimal	153	Optimal			8.58211	Strongly alkaline		Terra Sorb Complex	PHs	1	Foliar	0.7	1	1	0.317771	0.0210843	0.343373	0.00903614	3
145	20	Kocira, Sławomir	2020	10.1038/s41598-020-74959-43	bean	Legumes	Dfb	Boreal	Fully humid	Perspa	Poland	23.636	50.6577	3		81	126	Optimal	153	Optimal			8.58211	Strongly alkaline		Terra Sorb Complex	PHs	1	Foliar	1	1	1	0.317771	0.0210843	0.358434	0.0120482	3
146	20	Kocira, Sławomir	2020	10.1038/s41598-020-74959-45	bean	Legumes	Dfb	Boreal	Fully humid	Perspa	Poland	23.636	50.6577	3		81	126	Optimal	153	Optimal			8.58211	Strongly alkaline		Terra Sorb Complex	PHs	1	Foliar	0.7	1	2	0.317771	0.0210843	0.361446	0.0120482	3
147	20	Kocira, Sławomir	2020	10.1038/s41598-020-74959-47	bean	Legumes	Dfb	Boreal	Fully humid	Perspa	Poland	23.636	50.6577	3		81	126	Optimal	153	Optimal			8.58211	Strongly alkaline		Terra Sorb Complex	PHs	1	Foliar	1	1	2	0.317771	0.0210843	0.343373	0.0271084	3
148	21	Amer H M	2019	101016/jbcab2019101336	Cardoon	Others	BWh	Arid	Desert	Giza	Egypt	31.2089	30.0131	3											Clay loam		SWE	0	Foliar	0.33	1	2	0.018217	2.1e-05	0.021483	0.000181	0
149	21	Amer H M	2019	101016/jbcab2019101336	Cardoon	Others	BWh	Arid	Desert	Giza	Egypt	31.2089	30.0131	3											Clay loam		SWE	0	Foliar	0.67	1	2	0.018217	2.1e-05	0.023783	0.000111	0
150	21	Amer H M	2019	101016/jbcab2019101336	Cardoon	Others	BWh	Arid	Desert	Giza	Egypt	31.2089	30.0131	3											Clay loam		SWE	0	Foliar	1	1	2	0.018217	2.1e-05	0.02615	0.000152	0
151	21	Amer H M	2019	101016/jbcab2019101336	Cardoon	Others	BWh	Arid	Desert	Giza	Egypt	31.2089	30.0131	3											Clay loam		SWE	0	Foliar	0.33	1	2	0.018217	2.1e-05	0.021233	7.6e-05	0
152	21	Amer H M	2019	101016/jbcab2019101336	Cardoon	Others	BWh	Arid	Desert	Giza	Egypt	31.2089	30.0131	3											Clay loam		SWE	0	Foliar	0.67	1	2	0.018217	2.1e-05	0.02295	0.000147	0
153	21	Amer H M	2019	101016/jbcab2019101336	Cardoon	Others	BWh	Arid	Desert	Giza	Egypt	31.2089	30.0131	3											Clay loam		SWE	0	Foliar	1	1	2	0.018217	2.1e-05	0.02425	0.000137	0
154	21	Amer H M	2019	101016/jbcab2019101336	Cardoon	Others	BWh	Arid	Desert	Giza	Egypt	31.2089	30.0131	3											Clay loam		SWE	0	Foliar	0.33	1	2	0.018217	2.1e-05	0.018983	7.6e-05	0
155	21	Amer H M	2019	101016/jbcab2019101336	Cardoon	Others	BWh	Arid	Desert	Giza	Egypt	31.2089	30.0131	3											Clay loam		SWE	0	Foliar	0.67	1	2	0.018217	2.1e-05	0.020142	0.000136	0
156	21	Amer H M	2019	101016/jbcab2019101336	Cardoon	Others	BWh	Arid	Desert	Giza	Egypt	31.2089	30.0131	3											Clay loam		SWE	0	Foliar	1	1	2	0.018217	2.1e-05	0.021175	0.000111	0
157	21	Amer H M	2019	101016/jbcab2019101336	Cardoon	Others	BWh	Arid	Desert	Giza	Egypt	31.2089	30.0131	3											Clay loam		SWE	0	Foliar	0.33	1	2	0.018217	2.1e-05	0.019725	0.000211	0
158	21	Amer H M	2019	101016/jbcab2019101336	Cardoon	Others	BWh	Arid	Desert	Giza	Egypt	31.2089	30.0131	3											Clay loam		SWE	0	Foliar	0.67	1	2	0.018217	2.1e-05	0.022108	0.000223	0
159	21	Amer H M	2019	101016/jbcab2019101336	Cardoon	Others	BWh	Arid	Desert	Giza	Egypt	31.2089	30.0131	3											Clay loam		SWE	0	Foliar	1	1	2	0.018217	2.1e-05	0.023167	0.000281	0
160	22	Machiani, Mostafa Amani	2020	101016/jjclepro201906242	bean	Legumes	Dsa	Boreal	Summer dry	qadeh	Iran	45.3878	36.9563	3	0.19		17.1	Low	490.18	Optimal	0.7209	Nonsaline	7.7	Moderately alkaline	Silty clay		HFA	0	Soil	1	0	3	0.2592	0.0347328	0.2847	0.0381498	0
161	22	Machiani, Mostafa Amani	2020	101016/jjclepro201906244	fennel	Others	Dsa	Boreal	Summer dry	qadeh	Iran	45.3878	36.9563	3	0.19		17.1	Low	490.18	Optimal	0.7209	Nonsaline	7.7	Moderately alkaline	Silty clay		HFA	0	Soil	1	0	3	0.1733	0.0153197	0.2009	0.0177596	0
162	22	Machiani, Mostafa Amani	2020	101016/jjclepro201906246	dragonhead	Others	Dsa	Boreal	Summer dry	qadeh	Iran	45.3878	36.9563	3	0.19		17.1	Low	490.18	Optimal	0.7209	Nonsaline	7.7	Moderately alkaline	Silty clay		HFA	0	Soil	1	0	3	0.4178	0.0369335	0.4477	0.0395767	0
163	23	Al-Shammari A M A	2019	101080/1931526020181509922	okra	Vegetables	BWh	Arid	Desert	Baqubah	Iraq	44.6081	33.7517	5		54.01	8.04	Very low	81.79	Low	13.9335	Strongly saline	7.03514	Neutral	Silt loam	Tecamin max	PHs	1	Foliar	0.5	1	3	0.826	0.0798742	1.106	0.10695	0
164	23	Al-Shammari A M A	2019	101080/1931526020181509922	okra	Vegetables	BWh	Arid	Desert	Baqubah	Iraq	44.6081	33.7517	5		54.01	8.04	Very low	81.79	Low	13.9335	Strongly saline	7.03514	Neutral	Silt loam	Tecamin max	PHs	1	Foliar	1	1	3	0.826	0.0798742	1.014	0.0980538	0
165	24	Ali O.	2020	101371/jourlpone0216711	tomato	Vegetables	Am	Equatorial	Monsoonal	Valencia	Trinidad	-61.1971	10.6538	3												Stimplex	SWE	1	Foliar	1	0	1	1.6779	0.0195	2.5815	0.0114	1
166	24	Ali O.	2020	101371/jourlpone0216713	tomato	Vegetables	Am	Equatorial	Monsoonal	Valencia	Trinidad	-61.1971	10.6538	3												Stimplex	SWE	1	Foliar	1	0	1	1.227	0.0155	2.3991	0.0123	2
167	24	Ali O.	2020	101371/jourlpone0216715	sweet pepper	Vegetables	Am	Equatorial	Monsoonal	Valencia	Trinidad	-61.1971	10.6538	3												Stimplex	SWE	1	Foliar	1	0	1	2.1204	0.0111	3.641	0.0199	1
168	24	Ali O.	2020	101371/jourlpone0216717	sweet pepper	Vegetables	Am	Equatorial	Monsoonal	Valencia	Trinidad	-61.1971	10.6538	3												Stimplex	SWE	1	Foliar	1	0	1	1.2992	0.0122	2.5466	0.0107	2
169	25	Tejada Manuel	2019	101016/jeja201803003	maize	Cereals	Csa	Warm temperate	Summer dry	Trujillanos	Spain	-6.25751	38.9517	3	0.078		11	Very low	86.4	Low	0.767803	Nonsaline	7.09661	Neutral	Sandy loam	chicken feathers	PHs	0	Foliar	0.5	1	3	1.4118	0.0124	1.551	0.011	1
170	25	Tejada Manuel	2019	101016/jeja201803005	maize	Cereals	Csa	Warm temperate	Summer dry	Trujillanos	Spain	-6.25751	38.9517	3	0.078		11	Very low	86.4	Low	0.767803	Nonsaline	7.09661	Neutral	Sandy loam	chicken feathers	PHs	0	Foliar	1	1	3	1.4118	0.0124	1.6303	0.0135	1
171	25	Tejada Manuel	2019	101016/jeja201803007	maize	Cereals	Csa	Warm temperate	Summer dry	Trujillanos	Spain	-6.25751	38.9517	3	0.078		11	Very low	86.4	Low	0.767803	Nonsaline	7.09661	Neutral	Sandy loam	chicken feathers	PHs	0	Foliar	0.5	1	3	1.4229	0.0156	1.5532	0.012	2
172	25	Tejada Manuel	2019	101016/jeja201803009	maize	Cereals	Csa	Warm temperate	Summer dry	Trujillanos	Spain	-6.25751	38.9517	3	0.078		11	Very low	86.4	Low	0.767803	Nonsaline	7.09661	Neutral	Sandy loam	chicken feathers	PHs	0	Foliar	1	1	3	1.4229	0.0156	1.6663	0.0144	2
173	26	Tarantino Anlisa	2019	101016/jscienta201804055	apricot	Fruits	Cfa	Warm temperate	Fully humid	Cerignola	Italy	15.8936	41.2656	3											Loam	RADICON	HFA	1	Foliar	1	0	3	1.20667	3.83333	9.98333	6.66667e-10	1
174	26	Tarantino Anlisa	2019	101016/jscienta201804055	apricot	Fruits	Cfa	Warm temperate	Fully humid	Cerignola	Italy	15.8936	41.2656	3											Loam	RADICON	HFA	1	Foliar	1	0	3	2.11667	7e-09	3.16667	5e-09	2
175	27	Szczepanek, Małgorzata	2018		wheat	Cereals	Cfb	Warm temperate	Fully humid	Bydgoszcz	Poland	18.0084	53.1235	4	0.069		190	Optimal	95	Medium			6.95318	Neutral		Kelpak	SWE	1	Foliar	0.67	1	1	0.4697	0.0199623	0.4757	0.0202173	0
176	27	Szczepanek, Małgorzata	2018		wheat	Cereals	Cfb	Warm temperate	Fully humid	Bydgoszcz	Poland	18.0084	53.1235	4	0.069		190	Optimal	95	Medium			6.95318	Neutral		Kelpak	SWE	1	Foliar	0.67	1	1	0.4697	0.0199623	0.4874	0.0207145	0
177	27	Szczepanek, Małgorzata	2018		wheat	Cereals	Cfb	Warm temperate	Fully humid	Bydgoszcz	Poland	18.0084	53.1235	4	0.069		190	Optimal	95	Medium			6.95318	Neutral		Kelpak	SWE	1	Foliar	1	1	2	0.4697	0.0199623	0.4947	0.0210248	0
178	28	Sakr Weaam RA	2019	105829/idosijhsop20180117	Geranium	Others	BWh	Arid	Desert	El- Khaireya	Egypt	31.1337	30.1913	3		23	109	Optimal	168	Optimal	7.986	Moderately saline	7.33224		Clay loam	MLE	PE	0	Soil	0.33	1	1	1.95433	0.172763	2.4924	0.220328	1
179	28	Sakr Weaam RA	2019	105829/idosijhsop20180119	Geranium	Others	BWh	Arid	Desert	El- Khaireya	Egypt	31.1337	30.1913	3		23	109	Optimal	168	Optimal	7.986	Moderately saline	7.33224		Clay loam	MLE	PE	0	Soil	0.67	1	1	1.95433	0.172763	2.9076	0.257032	1
180	28	Sakr Weaam RA	2019	105829/idosijhsop20180121	Geranium	Others	BWh	Arid	Desert	El- Khaireya	Egypt	31.1337	30.1913	3		23	109	Optimal	168	Optimal	7.986	Moderately saline	7.33224		Clay loam	MLE	PE	0	Soil	1	1	1	1.95433	0.172763	3.44393	0.304444	1
181	28	Sakr Weaam RA	2019	105829/idosijhsop20180123	Geranium	Others	BWh	Arid	Desert	El- Khaireya	Egypt	31.1337	30.1913	3		23	109	Optimal	168	Optimal	7.986	Moderately saline	7.33224		Clay loam		SWE	0	Soil	0.33	1	1	1.95433	0.172763	2.282	0.201729	1
182	28	Sakr Weaam RA	2019	105829/idosijhsop20180125	Geranium	Others	BWh	Arid	Desert	El- Khaireya	Egypt	31.1337	30.1913	3		23	109	Optimal	168	Optimal	7.986	Moderately saline	7.33224		Clay loam		SWE	0	Soil	0.67	1	1	1.95433	0.172763	2.77	0.244868	1
183	28	Sakr Weaam RA	2019	105829/idosijhsop20180127	Geranium	Others	BWh	Arid	Desert	El- Khaireya	Egypt	31.1337	30.1913	3		23	109	Optimal	168	Optimal	7.986	Moderately saline	7.33224		Clay loam		SWE	0	Soil	1	1	1	1.95433	0.172763	3.13787	0.277387	1
184	28	Sakr Weaam RA	2019	105829/idosijhsop20180129	Geranium	Others	BWh	Arid	Desert	El- Khaireya	Egypt	31.1337	30.1913	3		23	109	Optimal	168	Optimal	7.986	Moderately saline	7.33224		Clay loam	MLE	PE	0	Soil	0.33	1	1	2.02	0.178568	2.43473	0.21523	2
185	28	Sakr Weaam RA	2019	105829/idosijhsop20180131	Geranium	Others	BWh	Arid	Desert	El- Khaireya	Egypt	31.1337	30.1913	3		23	109	Optimal	168	Optimal	7.986	Moderately saline	7.33224		Clay loam	MLE	PE	0	Soil	0.67	1	1	2.02	0.178568	2.9132	0.257527	2
186	28	Sakr Weaam RA	2019	105829/idosijhsop20180133	Geranium	Others	BWh	Arid	Desert	El- Khaireya	Egypt	31.1337	30.1913	3		23	109	Optimal	168	Optimal	7.986	Moderately saline	7.33224		Clay loam	MLE	PE	0	Soil	1	1	1	2.02	0.178568	3.59813	0.318075	2
187	28	Sakr Weaam RA	2019	105829/idosijhsop20180135	Geranium	Others	BWh	Arid	Desert	El- Khaireya	Egypt	31.1337	30.1913	3		23	109	Optimal	168	Optimal	7.986	Moderately saline	7.33224		Clay loam		SWE	0	Soil	0.33	1	1	2.02	0.178568	2.325	0.20553	2
188	28	Sakr Weaam RA	2019	105829/idosijhsop20180137	Geranium	Others	BWh	Arid	Desert	El- Khaireya	Egypt	31.1337	30.1913	3		23	109	Optimal	168	Optimal	7.986	Moderately saline	7.33224		Clay loam		SWE	0	Soil	0.67	1	1	2.02	0.178568	2.76307	0.244255	2
189	28	Sakr Weaam RA	2019	105829/idosijhsop20180139	Geranium	Others	BWh	Arid	Desert	El- Khaireya	Egypt	31.1337	30.1913	3		23	109	Optimal	168	Optimal	7.986	Moderately saline	7.33224		Clay loam		SWE	0	Soil	1	1	1	2.02	0.178568	3.123	0.276073	2
190	29	Rouphael Y	2018	103390/agronomy8070126	baby spich	Vegetables	Csa	Warm temperate	Summer dry	Portici	Italy	14.3391	40.8141	3	0.15	129	48	Optimal	1080	Optimal	1.2882	Nonsaline	6.8	Neutral	Sandy loam	Trainer	PHs	1	Foliar	1	0	4	1.45	0.140215	2.29	0.221443	0
191	29	Rouphael Y	2018	103390/agronomy8070126	baby spich	Vegetables	Csa	Warm temperate	Summer dry	Portici	Italy	14.3391	40.8141	3	0.15	129	48	Optimal	1080	Optimal	1.2882	Nonsaline	6.8	Neutral	Sandy loam	Kelpak	SWE	1	Foliar	1	0	4	1.45	0.140215	2.22	0.214674	0
192	29	Rouphael Y	2018	103390/agronomy8070126	baby spich	Vegetables	Csa	Warm temperate	Summer dry	Portici	Italy	14.3391	40.8141	3	0.15	129	48	Optimal	1080	Optimal	1.2882	Nonsaline	6.8	Neutral	Sandy loam	Amalgerol	PE	1	Foliar	1	0	4	1.45	0.140215	2.08	0.201136	0
193	30	Ronga D	2018	10.17660/ActaHortic.2019.1233.19	tomato	Vegetables	Cfa	Warm temperate	Fully humid	Reggio Emilia	Italy	10.6297	44.699	3	0.147		15	Very low	135.35	Optimal					Silty clay	Compost tea	PE	0	Foliar	1	0	3	7.11	0.687537	10.38	1.00375	0
194	30	Ronga D	2018	10.17660/ActaHortic.2019.1233.19	tomato	Vegetables	Cfa	Warm temperate	Fully humid	Reggio Emilia	Italy	10.6297	44.699	3	0.147		15	Very low	135.35	Optimal					Silty clay	Quarry rock dust	Si	0	Foliar	1	0	3	7.11	0.687537	9.36	0.905112	0
195	31	Kocira, An	2020	10.3390/agronomy10020190	common bean	Legumes	Dfb	Boreal	Fully humid	Perespa	Poland	23.636	50.6577	4			126	Optimal	153	Optimal			8.58211	Strongly alkaline		Fylloton	PHs	1	Foliar	1	0	1	0.3074	0.016907	0.3577	0.0196735	1
196	31	Kocira, An	2020	10.3390/agronomy10020192	common bean	Legumes	Dfb	Boreal	Fully humid	Perespa	Poland	23.636	50.6577	4			126	Optimal	153	Optimal			8.58211	Strongly alkaline		Fylloton	PHs	1	Foliar	1	0	1	0.2855	0.0157025	0.2944	0.016192	2
197	31	Kocira, An	2020	10.3390/agronomy10020194	common bean	Legumes	Dfb	Boreal	Fully humid	Perespa	Poland	23.636	50.6577	4			126	Optimal	153	Optimal			8.58211	Strongly alkaline		Fylloton	PHs	1	Foliar	1	0	1	0.3035	0.0166925	0.325	0.017875	3
198	31	Kocira, An	2020	10.3390/agronomy10020196	common bean	Legumes	Dfb	Boreal	Fully humid	Perespa	Poland	23.636	50.6577	4			126	Optimal	153	Optimal			8.58211	Strongly alkaline		Fylloton	PHs	1	Foliar	1	0	2	0.3074	0.016907	0.358	0.01969	1
199	31	Kocira, An	2020	10.3390/agronomy10020198	common bean	Legumes	Dfb	Boreal	Fully humid	Perespa	Poland	23.636	50.6577	4			126	Optimal	153	Optimal			8.58211	Strongly alkaline		Fylloton	PHs	1	Foliar	1	0	2	0.2855	0.0157025	0.3361	0.0184855	2
200	31	Kocira, An	2020	10.3390/agronomy10020200	common bean	Legumes	Dfb	Boreal	Fully humid	Perespa	Poland	23.636	50.6577	4			126	Optimal	153	Optimal			8.58211	Strongly alkaline		Fylloton	PHs	1	Foliar	1	0	2	0.3035	0.0166925	0.378	0.02079	3
201	31	Kocira, An	2020	10.3390/agronomy10020202	common bean	Legumes	Dfb	Boreal	Fully humid	Perespa	Poland	23.636	50.6577	4			126	Optimal	153	Optimal			8.58211	Strongly alkaline		Terra Sorb Complex	PHs	1	Foliar	1	0	1	0.3074	0.016907	0.3209	0.0176495	1
202	31	Kocira, An	2020	10.3390/agronomy10020204	common bean	Legumes	Dfb	Boreal	Fully humid	Perespa	Poland	23.636	50.6577	4			126	Optimal	153	Optimal			8.58211	Strongly alkaline		Terra Sorb Complex	PHs	1	Foliar	1	0	1	0.2855	0.0157025	0.3226	0.017743	2
203	31	Kocira, An	2020	10.3390/agronomy10020206	common bean	Legumes	Dfb	Boreal	Fully humid	Perespa	Poland	23.636	50.6577	4			126	Optimal	153	Optimal			8.58211	Strongly alkaline		Terra Sorb Complex	PHs	1	Foliar	1	0	1	0.3035	0.0166925	0.3277	0.0180235	3
204	31	Kocira, An	2020	10.3390/agronomy10020208	common bean	Legumes	Dfb	Boreal	Fully humid	Perespa	Poland	23.636	50.6577	4			126	Optimal	153	Optimal			8.58211	Strongly alkaline		Terra Sorb Complex	PHs	1	Foliar	1	0	2	0.3074	0.016907	0.3382	0.018601	1
205	31	Kocira, An	2020	10.3390/agronomy10020210	common bean	Legumes	Dfb	Boreal	Fully humid	Perespa	Poland	23.636	50.6577	4			126	Optimal	153	Optimal			8.58211	Strongly alkaline		Terra Sorb Complex	PHs	1	Foliar	1	0	2	0.2855	0.0157025	0.3207	0.0176385	2
206	31	Kocira, An	2020	10.3390/agronomy10020212	common bean	Legumes	Dfb	Boreal	Fully humid	Perespa	Poland	23.636	50.6577	4			126	Optimal	153	Optimal			8.58211	Strongly alkaline		Terra Sorb Complex	PHs	1	Foliar	1	0	2	0.3035	0.0166925	0.3454	0.018997	3
207	31	Kocira, An	2020	10.3390/agronomy10020214	common bean	Legumes	Dfb	Boreal	Fully humid	Perespa	Poland	23.636	50.6577	4			126	Optimal	153	Optimal			8.58211	Strongly alkaline		Kelpak	SWE	1	Foliar	1	0	1	0.3074	0.016907	0.3657	0.0201135	1
208	31	Kocira, An	2020	10.3390/agronomy10020216	common bean	Legumes	Dfb	Boreal	Fully humid	Perespa	Poland	23.636	50.6577	4			126	Optimal	153	Optimal			8.58211	Strongly alkaline		Kelpak	SWE	1	Foliar	1	0	1	0.2855	0.0157025	0.3685	0.0202675	2
209	31	Kocira, An	2020	10.3390/agronomy10020218	common bean	Legumes	Dfb	Boreal	Fully humid	Perespa	Poland	23.636	50.6577	4			126	Optimal	153	Optimal			8.58211	Strongly alkaline		Kelpak	SWE	1	Foliar	1	0	1	0.3035	0.0166925	0.3633	0.0199815	3
210	31	Kocira, An	2020	10.3390/agronomy10020220	common bean	Legumes	Dfb	Boreal	Fully humid	Perespa	Poland	23.636	50.6577	4			126	Optimal	153	Optimal			8.58211	Strongly alkaline		Kelpak	SWE	1	Foliar	1	0	2	0.3074	0.016907	0.3745	0.0205975	1
211	31	Kocira, An	2020	10.3390/agronomy10020222	common bean	Legumes	Dfb	Boreal	Fully humid	Perespa	Poland	23.636	50.6577	4			126	Optimal	153	Optimal			8.58211	Strongly alkaline		Kelpak	SWE	1	Foliar	1	0	2	0.2855	0.0157025	0.3822	0.021021	2
212	31	Kocira, An	2020	10.3390/agronomy10020190	common bean	Legumes	Dfb	Boreal	Fully humid	Perespa	Poland	23.636	50.6577	4			126	Optimal	153	Optimal			8.58211	Strongly alkaline		Kelpak	SWE	1	Foliar	1	0	2	0.3035	0.0166925	0.3786	0.020823	3
213	32	Popko M	2018	103390/molecules23020470	wheat	Cereals	Cfb	Warm temperate	Fully humid	Wrocław	Poland	17.0385	51.1079	4									8.58211	Strongly alkaline	Sandy loam	AminoPrim	PHs	1	Foliar	1	1	2	0.498	0.049	0.525	0.092	0
214	32	Popko M	2018	103390/molecules23020470	wheat	Cereals	Cfb	Warm temperate	Fully humid	Wrocław	Poland	17.0385	51.1079	4									8.58211	Strongly alkaline	Sandy loam	AminoHort	PHs	1	Foliar	0.8	1	2	0.498	0.049	0.464	0.107	0
215	32	Popko M	2018	103390/molecules23020470	wheat	Cereals	Cfb	Warm temperate	Fully humid	Wrocław	Poland	17.0385	51.1079	4									8.58211	Strongly alkaline	Sandy loam	AminoHort	PHs	1	Foliar	1	1	2	0.498	0.049	0.555	0.048	0
216	33	Popescu G C	2018	101590/1678-44992017030	grape	Fruits	Cfb	Warm temperate	Fully humid	Pitesti	Romania	24.8692	44.8565	3												BioHumusSol	HFA	1	Foliar	0.6	1	2	0.861056	0.03472	0.923552	0.048608	1
217	33	Popescu G C	2018	101590/1678-44992017030	grape	Fruits	Cfb	Warm temperate	Fully humid	Pitesti	Romania	24.8692	44.8565	3												BioHumusSol	HFA	1	Foliar	0.8	1	2	0.861056	0.03472	1.11104	0.031248	1
218	33	Popescu G C	2018	101590/1678-44992017030	grape	Fruits	Cfb	Warm temperate	Fully humid	Pitesti	Romania	24.8692	44.8565	3												BioHumusSol	HFA	1	Foliar	1	1	2	0.861056	0.03472	1.12493	0.170128	1
219	33	Popescu G C	2018	101590/1678-44992017030	grape	Fruits	Cfb	Warm temperate	Fully humid	Pitesti	Romania	24.8692	44.8565	3												BioHumusSol	HFA	1	Foliar	0.6	1	2	0.743008	0.065968	0.784672	0.079856	1
220	33	Popescu G C	2018	101590/1678-44992017030	grape	Fruits	Cfb	Warm temperate	Fully humid	Pitesti	Romania	24.8692	44.8565	3												BioHumusSol	HFA	1	Foliar	0.8	1	2	0.743008	0.065968	0.97216	0.038192	1
221	33	Popescu G C	2018	101590/1678-44992017030	grape	Fruits	Cfb	Warm temperate	Fully humid	Pitesti	Romania	24.8692	44.8565	3												BioHumusSol	HFA	1	Foliar	1	1	2	0.743008	0.065968	1.01382	0.048608	1
222	33	Popescu G C	2018	101590/1678-44992017030	grape	Fruits	Cfb	Warm temperate	Fully humid	Pitesti	Romania	24.8692	44.8565	3												BioHumusSol	HFA	1	Foliar	0.6	1	2	0.871472	0.097216	0.93744	0.059024	2
223	33	Popescu G C	2018	101590/1678-44992017030	grape	Fruits	Cfb	Warm temperate	Fully humid	Pitesti	Romania	24.8692	44.8565	3												BioHumusSol	HFA	1	Foliar	0.8	1	2	0.871472	0.097216	1.09368	0.097216	2
224	33	Popescu G C	2018	101590/1678-44992017030	grape	Fruits	Cfb	Warm temperate	Fully humid	Pitesti	Romania	24.8692	44.8565	3												BioHumusSol	HFA	1	Foliar	1	1	2	0.871472	0.097216	1.14923	0.114576	2
225	33	Popescu G C	2018	101590/1678-44992017030	grape	Fruits	Cfb	Warm temperate	Fully humid	Pitesti	Romania	24.8692	44.8565	3												BioHumusSol	HFA	1	Foliar	0.6	1	2	0.76384	0.05208	0.819392	0.038192	2
226	33	Popescu G C	2018	101590/1678-44992017030	grape	Fruits	Cfb	Warm temperate	Fully humid	Pitesti	Romania	24.8692	44.8565	3												BioHumusSol	HFA	1	Foliar	0.8	1	2	0.76384	0.05208	0.940912	0.065968	2
227	33	Popescu G C	2018	101590/1678-44992017030	grape	Fruits	Cfb	Warm temperate	Fully humid	Pitesti	Romania	24.8692	44.8565	3												BioHumusSol	HFA	1	Foliar	1	1	2	0.76384	0.05208	1.00688	0.055552	2
228	34	Merwad Abdel-Rahaman MA	2018	101080/0190416720171384012	pea	Legumes	BWh	Arid	Desert	El-Sharkia	Egypt	31.7195	30.7327	4		56.34	5.26	Very low	69.87	Low	1.8555	Nonsaline	7.94693	Moderately alkaline	Sand	MLE	PHs	0	Foliar	0.25	1	3	0.178161	0.0238736	0.22069	0.0295724	1
229	34	Merwad Abdel-Rahaman MA	2018	101080/0190416720171384012	pea	Legumes	BWh	Arid	Desert	El-Sharkia	Egypt	31.7195	30.7327	4		56.34	5.26	Very low	69.87	Low	1.8555	Nonsaline	7.94693	Moderately alkaline	Sand	MLE	PHs	0	Foliar	0.5	1	3	0.178161	0.0238736	0.263218	0.0352713	1
230	34	Merwad Abdel-Rahaman MA	2018	101080/0190416720171384012	pea	Legumes	BWh	Arid	Desert	El-Sharkia	Egypt	31.7195	30.7327	4		56.34	5.26	Very low	69.87	Low	1.8555	Nonsaline	7.94693	Moderately alkaline	Sand	MLE	PHs	0	Foliar	0.75	1	3	0.178161	0.0238736	0.265517	0.0355793	1
231	34	Merwad Abdel-Rahaman MA	2018	101080/0190416720171384012	pea	Legumes	BWh	Arid	Desert	El-Sharkia	Egypt	31.7195	30.7327	4		56.34	5.26	Very low	69.87	Low	1.8555	Nonsaline	7.94693	Moderately alkaline	Sand	MLE	PHs	0	Foliar	1	1	3	0.178161	0.0238736	0.303448	0.0406621	1
232	34	Merwad Abdel-Rahaman MA	2018	101080/0190416720171384012	pea	Legumes	BWh	Arid	Desert	El-Sharkia	Egypt	31.7195	30.7327	4		56.34	5.26	Very low	69.87	Low	1.8555	Nonsaline	7.94693	Moderately alkaline	Sand	MLE	PHs	0	Foliar	0.25	1	3	0.136437	0.0182825	0.181379	0.0243048	2
233	34	Merwad Abdel-Rahaman MA	2018	101080/0190416720171384012	pea	Legumes	BWh	Arid	Desert	El-Sharkia	Egypt	31.7195	30.7327	4		56.34	5.26	Very low	69.87	Low	1.8555	Nonsaline	7.94693	Moderately alkaline	Sand	MLE	PHs	0	Foliar	0.5	1	3	0.136437	0.0182825	0.252644	0.0338543	2
234	34	Merwad Abdel-Rahaman MA	2018	101080/0190416720171384012	pea	Legumes	BWh	Arid	Desert	El-Sharkia	Egypt	31.7195	30.7327	4		56.34	5.26	Very low	69.87	Low	1.8555	Nonsaline	7.94693	Moderately alkaline	Sand	MLE	PHs	0	Foliar	0.75	1	3	0.136437	0.0182825	0.268161	0.0359336	2
235	34	Merwad Abdel-Rahaman MA	2018	101080/0190416720171384012	pea	Legumes	BWh	Arid	Desert	El-Sharkia	Egypt	31.7195	30.7327	4		56.34	5.26	Very low	69.87	Low	1.8555	Nonsaline	7.94693	Moderately alkaline	Sand	MLE	PHs	0	Foliar	1	1	3	0.136437	0.0182825	0.297356	0.0398457	2
236	35	Abbas, Mazhar	2020	10.3390/horticulturae6020028	onion	Vegetables	BSh	Arid	Steppe	Faisalabad	Pakistan	73.135	31.4504	9	0.035		6.79	Very low	135	Optimal	2.19	Slightly saline	8.12	Moderately alkaline	Sandy loam	Wokozim	SWE	1	Foliar	0.17	1	3	0.654106	0.0732599	1.37682	0.154204	0
237	35	Abbas, Mazhar	2020	10.3390/horticulturae6020028	onion	Vegetables	BSh	Arid	Steppe	Faisalabad	Pakistan	73.135	31.4504	9	0.035		6.79	Very low	135	Optimal	2.19	Slightly saline	8.12	Moderately alkaline	Sandy loam	Wokozim	SWE	1	Foliar	0.33	1	3	0.654106	0.0732599	1.09226	0.122333	0
238	35	Abbas, Mazhar	2020	10.3390/horticulturae6020028	onion	Vegetables	BSh	Arid	Steppe	Faisalabad	Pakistan	73.135	31.4504	9	0.035		6.79	Very low	135	Optimal	2.19	Slightly saline	8.12	Moderately alkaline	Sandy loam	Wokozim	SWE	1	Foliar	0.67	1	3	0.654106	0.0732599	0.941788	0.10548	0
239	35	Abbas, Mazhar	2020	10.3390/horticulturae6020028	onion	Vegetables	BSh	Arid	Steppe	Faisalabad	Pakistan	73.135	31.4504	9	0.035		6.79	Very low	135	Optimal	2.19	Slightly saline	8.12	Moderately alkaline	Sandy loam	Wokozim	SWE	1	Foliar	1	1	3	0.654106	0.0732599	0.792879	0.0888025	0
240	36	Correia, Sofia	2020	10.3390/plants9040410	cherry	Fruits	Cfb	Warm temperate	Fully humid	Montenegro	Portugal	19.3744	42.7087	6			75	Optimal	125	Medium			5.49841	Moderately acid			SWE	0	Foliar	1	1	3	0.268078	0.0493827	0.4903	0.042328	0
241	37	Alabdulla, S. A.	2019	10.31830/2348-7542.2019.130	oat	Cereals	BWh	Arid	Desert	Basrah	Iraq	47.7738	30.5258	3		30.5	15.9	Very low	110.43	Medium	7.6383	Moderately saline	7.5	Moderately alkaline			HFA	0	Foliar	0.33	1	2	0.3117	0.0132473	0.5115	0.0217388	1
242	37	Alabdulla, S. A.	2019	10.31830/2348-7542.2019.130	oat	Cereals	BWh	Arid	Desert	Basrah	Iraq	47.7738	30.5258	3		30.5	15.9	Very low	110.43	Medium	7.6383	Moderately saline	7.5	Moderately alkaline			HFA	0	Foliar	0.67	1	2	0.3117	0.0132473	0.6194	0.0263245	1
243	37	Alabdulla, S. A.	2019	10.31830/2348-7542.2019.130	oat	Cereals	BWh	Arid	Desert	Basrah	Iraq	47.7738	30.5258	3		30.5	15.9	Very low	110.43	Medium	7.6383	Moderately saline	7.5	Moderately alkaline			HFA	0	Foliar	1	1	2	0.3117	0.0132473	0.5952	0.025296	1
244	37	Alabdulla, S. A.	2019	10.31830/2348-7542.2019.130	oat	Cereals	BWh	Arid	Desert	Basrah	Iraq	47.7738	30.5258	3		31.16	17.3	Low	116.11	Medium	8.4435	Strongly saline	7.8	Moderately alkaline			HFA	0	Foliar	0.33	1	2	0.2459	0.0104508	0.4199	0.0178458	2
245	37	Alabdulla, S. A.	2019	10.31830/2348-7542.2019.130	oat	Cereals	BWh	Arid	Desert	Basrah	Iraq	47.7738	30.5258	3		31.16	17.3	Low	116.11	Medium	8.4435	Strongly saline	7.8	Moderately alkaline			HFA	0	Foliar	0.67	1	2	0.2459	0.0104508	0.5967	0.0253598	2
246	37	Alabdulla, S. A.	2019	10.31830/2348-7542.2019.130	oat	Cereals	BWh	Arid	Desert	Basrah	Iraq	47.7738	30.5258	3		31.16	17.3	Low	116.11	Medium	8.4435	Strongly saline	7.8	Moderately alkaline			HFA	0	Foliar	1	1	2	0.2459	0.0104508	0.5872	0.024956	2
247	38	ShM Thaa	2017	104172/2376-03541000193	pulm	Fruits	BWh	Arid	Desert	Ashmoun	Egypt	30.9782	30.2945	3												MLE	PE	0	Foliar	0.67	1	3	1.67568	0.192	2.24592	0.19776	1
248	38	ShM Thaa	2017	104172/2376-03541000193	pulm	Fruits	BWh	Arid	Desert	Ashmoun	Egypt	30.9782	30.2945	3												MLE	PE	0	Foliar	0.83	1	3	1.67568	0.192	2.40288	0.192	1
249	38	ShM Thaa	2017	104172/2376-03541000193	pulm	Fruits	BWh	Arid	Desert	Ashmoun	Egypt	30.9782	30.2945	3												MLE	PE	0	Foliar	1	1	3	1.67568	0.192	2.80416	0.19776	1
250	38	ShM Thaa	2017	104172/2376-03541000193	pulm	Fruits	BWh	Arid	Desert	Ashmoun	Egypt	30.9782	30.2945	3												MLE	PE	0	Foliar	0.67	1	3	1.93152	0.192	2.32704	0.192	2
251	38	ShM Thaa	2017	104172/2376-03541000193	pulm	Fruits	BWh	Arid	Desert	Ashmoun	Egypt	30.9782	30.2945	3												MLE	PE	0	Foliar	0.83	1	3	1.93152	0.192	2.6472	0.18624	2
252	38	ShM Thaa	2017	104172/2376-03541000193	pulm	Fruits	BWh	Arid	Desert	Ashmoun	Egypt	30.9782	30.2945	3												MLE	PE	0	Foliar	1	1	3	1.93152	0.192	2.81616	0.18576	2
253	39	Mahmood sir	2017	1021162/PAKJAS/175654	pepper	Vegetables	Cwa	Warm temperate	Winter dry	Pir Mehr Ali Shah Arid	Pakistan	73.0815	33.6492	3													Chi	0	Foliar	0.6	1	continuous	0.973	0.0940891	1.311	0.126774	1
254	39	Mahmood sir	2017	1021162/PAKJAS/175656	pepper	Vegetables	Cwa	Warm temperate	Winter dry	Pir Mehr Ali Shah Arid	Pakistan	73.0815	33.6492	3													Chi	0	Foliar	0.8	1	continuous	0.973	0.0940891	1.176	0.113719	1
255	39	Mahmood sir	2017	1021162/PAKJAS/175658	pepper	Vegetables	Cwa	Warm temperate	Winter dry	Pir Mehr Ali Shah Arid	Pakistan	73.0815	33.6492	3													Chi	0	Foliar	1	1	continuous	0.973	0.0940891	1.076	0.104049	1
256	39	Mahmood sir	2017	1021162/PAKJAS/175660	pepper	Vegetables	Cwa	Warm temperate	Winter dry	Pir Mehr Ali Shah Arid	Pakistan	73.0815	33.6492	3													Chi	0	Foliar	0.6	1	continuous	1.187	0.114783	1.261	0.121939	2
257	39	Mahmood sir	2017	1021162/PAKJAS/175662	pepper	Vegetables	Cwa	Warm temperate	Winter dry	Pir Mehr Ali Shah Arid	Pakistan	73.0815	33.6492	3													Chi	0	Foliar	0.8	1	continuous	1.187	0.114783	1.241	0.120005	2
258	39	Mahmood sir	2017	1021162/PAKJAS/175664	pepper	Vegetables	Cwa	Warm temperate	Winter dry	Pir Mehr Ali Shah Arid	Pakistan	73.0815	33.6492	3													Chi	0	Foliar	1	1	continuous	1.187	0.114783	1.289	0.124646	2
259	40	Kahraman A	2017	10.18805/lr.v0iOF.3763	cowpea	Legumes	Csb	Warm temperate	Summer dry	Konya	Turkey	32.4932	37.8746	3									8.05	Moderately alkaline	Clay loam	Konya Seker	HFA	1	Foliar	0.47	1	2	0.173711	0.0232773	0.191486	0.0256591	0
260	40	Kahraman A	2017	10.18805/lr.v0iOF.3763	cowpea	Legumes	Csb	Warm temperate	Summer dry	Konya	Turkey	32.4932	37.8746	3									8.05	Moderately alkaline	Clay loam	Konya Seker	HFA	1	Foliar	0.73	1	2	0.173711	0.0232773	0.187824	0.0251684	0
261	40	Kahraman A	2017	10.18805/lr.v0iOF.3763	cowpea	Legumes	Csb	Warm temperate	Summer dry	Konya	Turkey	32.4932	37.8746	3									8.05	Moderately alkaline	Clay loam	Konya Seker	HFA	1	Foliar	1	1	2	0.173711	0.0232773	0.200942	0.0269262	0
262	41	Hidangmayum Akash	2018		onion	Vegetables	Csa	Warm temperate	Summer dry	Allahabad Uttar Pradesh	India	81.8463	25.4358	4												organic dews	SWE	1	Foliar	0.47	1	4	6.0803	0.486691	6.667	0.546694	0
263	41	Hidangmayum Akash	2018		onion	Vegetables	Csa	Warm temperate	Summer dry	Allahabad Uttar Pradesh	India	81.8463	25.4358	4												organic dews	SWE	1	Foliar	0.6	1	4	6.0803	0.486691	7.20903	0.566695	0
264	41	Hidangmayum Akash	2018		onion	Vegetables	Csa	Warm temperate	Summer dry	Allahabad Uttar Pradesh	India	81.8463	25.4358	4												organic dews	SWE	1	Foliar	0.73	1	4	6.0803	0.486691	8.0144	0.566695	0
265	41	Hidangmayum Akash	2018		onion	Vegetables	Csa	Warm temperate	Summer dry	Allahabad Uttar Pradesh	India	81.8463	25.4358	4												organic dews	SWE	1	Foliar	0.87	1	4	6.0803	0.486691	7.41704	1.3734	0
266	41	Hidangmayum Akash	2018		onion	Vegetables	Csa	Warm temperate	Summer dry	Allahabad Uttar Pradesh	India	81.8463	25.4358	4												organic dews	SWE	1	Foliar	1	1	4	6.0803	0.486691	7.40504	1.06005	0
267	42	Falcón-Rodríguez, A. B.	2017	105424/sjar/2017151-9288	potato	Root/tuber crops	Aw	Equatorial	Winter dry	Mayabeque	Cuba	-81.9535	22.8927	3			436	Optimal	89.7	Low			6.69706	Neutral			Chi	0	Foliar	0.36	1	3	3.021	0.287297	3.198	0.30413	0
268	42	Falcón-Rodríguez, A. B.	2017	105424/sjar/2017151-9288	potato	Root/tuber crops	Aw	Equatorial	Winter dry	Mayabeque	Cuba	-81.9535	22.8927	3			436	Optimal	89.7	Low			6.69706	Neutral			Chi	0	Foliar	0.58	1	3	3.021	0.287297	3.67	0.349017	0
269	42	Falcón-Rodríguez, A. B.	2017	105424/sjar/2017151-9288	potato	Root/tuber crops	Aw	Equatorial	Winter dry	Mayabeque	Cuba	-81.9535	22.8927	3			436	Optimal	89.7	Low			6.69706	Neutral			Chi	0	Foliar	1	1	3	3.021	0.287297	3.198	0.30413	0
270	42	Falcón-Rodríguez, A. B.	2017	105424/sjar/2017151-9288	potato	Root/tuber crops	Aw	Equatorial	Winter dry	Mayabeque	Cuba	-81.9535	22.8927	3			436	Optimal	89.7	Low			6.69706	Neutral			Chi	0	Foliar	0.36	1	3	3.021	0.287297	3.396	0.32296	0
271	42	Falcón-Rodríguez, A. B.	2017	105424/sjar/2017151-9288	potato	Root/tuber crops	Aw	Equatorial	Winter dry	Mayabeque	Cuba	-81.9535	22.8927	3			436	Optimal	89.7	Low			6.69706	Neutral			Chi	0	Foliar	0.58	1	3	3.021	0.287297	3.543	0.336939	0
272	42	Falcón-Rodríguez, A. B.	2017	105424/sjar/2017151-9288	potato	Root/tuber crops	Aw	Equatorial	Winter dry	Mayabeque	Cuba	-81.9535	22.8927	3			436	Optimal	89.7	Low			6.69706	Neutral			Chi	0	Foliar	1	1	3	3.021	0.287297	3.432	0.326383	0
273	42	Falcón-Rodríguez, A. B.	2017	105424/sjar/2017151-9288	potato	Root/tuber crops	Aw	Equatorial	Winter dry	Mayabeque	Cuba	-81.9535	22.8927	3			436	Optimal	89.7	Low			6.69706	Neutral			Chi	0	Foliar	0.36	1	3	3.295	0.313354	3.492	0.332089	0
274	42	Falcón-Rodríguez, A. B.	2017	105424/sjar/2017151-9288	potato	Root/tuber crops	Aw	Equatorial	Winter dry	Mayabeque	Cuba	-81.9535	22.8927	3			436	Optimal	89.7	Low			6.69706	Neutral			Chi	0	Foliar	0.58	1	3	3.295	0.313354	3.547	0.33732	0
275	42	Falcón-Rodríguez, A. B.	2017	105424/sjar/2017151-9288	potato	Root/tuber crops	Aw	Equatorial	Winter dry	Mayabeque	Cuba	-81.9535	22.8927	3			436	Optimal	89.7	Low			6.69706	Neutral			Chi	0	Foliar	1	1	3	3.295	0.313354	2.887	0.274554	0
276	42	Falcón-Rodríguez, A. B.	2017	105424/sjar/2017151-9288	potato	Root/tuber crops	Aw	Equatorial	Winter dry	Mayabeque	Cuba	-81.9535	22.8927	3			436	Optimal	89.7	Low			6.69706	Neutral			Chi	0	Foliar	0.36	1	3	3.295	0.313354	3.914	0.372221	0
277	42	Falcón-Rodríguez, A. B.	2017	105424/sjar/2017151-9288	potato	Root/tuber crops	Aw	Equatorial	Winter dry	Mayabeque	Cuba	-81.9535	22.8927	3			436	Optimal	89.7	Low			6.69706	Neutral			Chi	0	Foliar	0.58	1	3	3.295	0.313354	3.711	0.352916	0
278	42	Falcón-Rodríguez, A. B.	2017	105424/sjar/2017151-9288	potato	Root/tuber crops	Aw	Equatorial	Winter dry	Mayabeque	Cuba	-81.9535	22.8927	3			436	Optimal	89.7	Low			6.69706	Neutral			Chi	0	Foliar	1	1	3	3.295	0.313354	4.023	0.382587	0
279	43	sir Maryam	2016	101016/jscienta201607033	mandarin	Fruits	BSh	Arid	Steppe	Faisalabad	Pakistan	73.135	31.4504	4												MLE	PE	0	Foliar	1	0	1	1.46923	0.242423	2.18893	0.361173	1
280	43	sir Maryam	2016	101016/jscienta201607035	mandarin	Fruits	BSh	Arid	Steppe	Faisalabad	Pakistan	73.135	31.4504	4												MLE	PE	0	Foliar	1	0	1	0.452567	0.0746735	0.884708	0.145977	2
281	44	Mondal M M A	2016	1021162/PAKJAS/162011	tomato	Vegetables	Am	Equatorial	Monsoonal	Mymensingh	Bangladesh	90.4203	24.7471	3											Sandy loam		Chi	0	Foliar	0.25	1	2	1.714	0.165744	1.923	0.185954	1
282	44	Mondal M M A	2016	1021162/PAKJAS/162011	tomato	Vegetables	Am	Equatorial	Monsoonal	Mymensingh	Bangladesh	90.4203	24.7471	3											Sandy loam		Chi	0	Foliar	0.5	1	2	1.714	0.165744	2.687	0.259833	1
283	44	Mondal M M A	2016	1021162/PAKJAS/162011	tomato	Vegetables	Am	Equatorial	Monsoonal	Mymensingh	Bangladesh	90.4203	24.7471	3											Sandy loam		Chi	0	Foliar	0.75	1	2	1.714	0.165744	3.01	0.291067	1
284	44	Mondal M M A	2016	1021162/PAKJAS/162011	tomato	Vegetables	Am	Equatorial	Monsoonal	Mymensingh	Bangladesh	90.4203	24.7471	3											Sandy loam		Chi	0	Foliar	1	1	2	1.714	0.165744	2.182	0.210999	1
285	44	Mondal M M A	2016	1021162/PAKJAS/162011	tomato	Vegetables	Am	Equatorial	Monsoonal	Mymensingh	Bangladesh	90.4203	24.7471	3											Sandy loam		Chi	0	Foliar	0.25	1	2	3.245	0.313792	3.428	0.331488	2
286	44	Mondal M M A	2016	1021162/PAKJAS/162011	tomato	Vegetables	Am	Equatorial	Monsoonal	Mymensingh	Bangladesh	90.4203	24.7471	3											Sandy loam		Chi	0	Foliar	0.5	1	2	3.245	0.313792	4.083	0.394826	2
287	44	Mondal M M A	2016	1021162/PAKJAS/162011	tomato	Vegetables	Am	Equatorial	Monsoonal	Mymensingh	Bangladesh	90.4203	24.7471	3											Sandy loam		Chi	0	Foliar	0.75	1	2	3.245	0.313792	4.112	0.39763	2
288	44	Mondal M M A	2016	1021162/PAKJAS/162011	tomato	Vegetables	Am	Equatorial	Monsoonal	Mymensingh	Bangladesh	90.4203	24.7471	3											Sandy loam		Chi	0	Foliar	1	1	2	3.245	0.313792	3.97	0.383899	2
289	45	Dudaš, Slavica	2016	101515/botcro-2016-0023	lettuce	Vegetables	Cfa	Warm temperate	Fully humid	Porec	Croatia	13.5947	45.2272	3			49.98	Optimal	68.8	Low			7.77277	Moderately alkaline		Bio-algeen	SWE	1	Foliar	1	0	2	1.26	0.13	2.54	0.32	0
290	46	Pourghasemian N	2020	101016/jagwat2019105997	sesame	Others	BSk	Arid	Steppe	Shahid Bahor	Iran	57.1055	30.252	3	0.089		11.3	Very low	287	Optimal	2.7339	Slightly saline	7.70106	Moderately alkaline	Sandy clay loam	licorice extract	PE	0	Foliar	1	0	continuous	0.155631	0.017748	0.163481	0.01092	0
291	46	Pourghasemian N	2020	101016/jagwat2019105997	sesame	Others	BSk	Arid	Steppe	Shahid Bahor	Iran	57.1055	30.252	3	0.089		11.3	Very low	287	Optimal	2.7339	Slightly saline	7.70106	Moderately alkaline	Sandy clay loam	beewax water extract	PHs	0	Foliar	1	0	continuous	0.155631	0.017748	0.176109	0.01092	0
292	47	Wang M	2015	10.1016/j.fcr.2014.12.008	wheat	Cereals	Cwa	Warm temperate	Winter dry	Yanglinqianyang	China	108.085	34.2721	3									7.19906	Neutral		COS	Chi	1	Seed	1	0	1	0.45352	0.002939	0.48536	0.003533	1
293	47	Wang M	2015	10.1016/j.fcr.2014.12.010	wheat	Cereals	Cwa	Warm temperate	Winter dry	Yanglinqianyang	China	108.085	34.2721	3									7.19906	Neutral		COS	Chi	1	Seed	1	0	1	0.48865	0.003348	0.51073	0.0002737	1
294	47	Wang M	2015	10.1016/j.fcr.2014.12.012	wheat	Cereals	Cwa	Warm temperate	Winter dry	Yanglinqianyang	China	108.085	34.2721	3									7.19906	Neutral		COS	Chi	1	Seed	1	0	1	0.49668	0.003156	0.52349	0.0002835	1
295	47	Wang M	2015	10.1016/j.fcr.2014.12.014	wheat	Cereals	Cwa	Warm temperate	Winter dry	Yanglinqianyang	China	108.085	34.2721	3									7.19906	Neutral		COS	Chi	1	Seed	1	0	1	0.55249	0.003131	0.57585	0.002414	2
296	47	Wang M	2015	10.1016/j.fcr.2014.12.016	wheat	Cereals	Cwa	Warm temperate	Winter dry	Yanglinqianyang	China	108.085	34.2721	3									7.19906	Neutral		COS	Chi	1	Seed	1	0	1	0.53304	0.002882	0.5714	0.003427	2
297	47	Wang M	2015	10.1016/j.fcr.2014.12.018	wheat	Cereals	Cwa	Warm temperate	Winter dry	Yanglinqianyang	China	108.085	34.2721	3									7.19906	Neutral		COS	Chi	1	Seed	1	0	1	0.53471	0.003171	0.57362	0.0003428	2
298	47	Wang M	2015	10.1016/j.fcr.2014.12.020	wheat	Cereals	Cwa	Warm temperate	Winter dry	Yanglinqianyang	China	108.085	34.2721	3									7.19906	Neutral		COS	Chi	1	Foliar	1	0	3	0.45851	0.002752	0.43099	0.002943	1
299	47	Wang M	2015	10.1016/j.fcr.2014.12.022	wheat	Cereals	Cwa	Warm temperate	Winter dry	Yanglinqianyang	China	108.085	34.2721	3									7.19906	Neutral		COS	Chi	1	Foliar	1	0	3	0.45851	0.002752	0.44188	0.002624	1
300	47	Wang M	2015	10.1016/j.fcr.2014.12.024	wheat	Cereals	Cwa	Warm temperate	Winter dry	Yanglinqianyang	China	108.085	34.2721	3									7.19906	Neutral		COS	Chi	1	Foliar	1	0	3	0.45851	0.002752	0.45618	0.003253	1
301	47	Wang M	2015	10.1016/j.fcr.2014.12.026	wheat	Cereals	Cwa	Warm temperate	Winter dry	Yanglinqianyang	China	108.085	34.2721	3									7.19906	Neutral		COS	Chi	1	Foliar	1	0	3	0.45097	0.003063	0.43823	0.002864	1
302	47	Wang M	2015	10.1016/j.fcr.2014.12.028	wheat	Cereals	Cwa	Warm temperate	Winter dry	Yanglinqianyang	China	108.085	34.2721	3									7.19906	Neutral		COS	Chi	1	Foliar	1	0	3	0.45097	0.003063	0.4607	0.002651	1
303	47	Wang M	2015	10.1016/j.fcr.2014.12.030	wheat	Cereals	Cwa	Warm temperate	Winter dry	Yanglinqianyang	China	108.085	34.2721	3									7.19906	Neutral		COS	Chi	1	Foliar	1	0	3	0.45097	0.003063	0.49695	0.00323	1
304	47	Wang M	2015	10.1016/j.fcr.2014.12.032	wheat	Cereals	Cwa	Warm temperate	Winter dry	Yanglinqianyang	China	108.085	34.2721	3									7.19906	Neutral		COS	Chi	1	Foliar	1	0	3	0.39062	0.002905	0.40588	0.003207	1
305	47	Wang M	2015	10.1016/j.fcr.2014.12.034	wheat	Cereals	Cwa	Warm temperate	Winter dry	Yanglinqianyang	China	108.085	34.2721	3									7.19906	Neutral		COS	Chi	1	Foliar	1	0	3	0.39062	0.002905	0.41717	0.00326	1
306	47	Wang M	2015	10.1016/j.fcr.2014.12.036	wheat	Cereals	Cwa	Warm temperate	Winter dry	Yanglinqianyang	China	108.085	34.2721	3									7.19906	Neutral		COS	Chi	1	Foliar	1	0	3	0.39062	0.002905	0.40279	0.003125	1
307	47	Wang M	2015	10.1016/j.fcr.2014.12.038	wheat	Cereals	Cwa	Warm temperate	Winter dry	Yanglinqianyang	China	108.085	34.2721	3									7.19906	Neutral		COS	Chi	1	Foliar	1	0	3	0.43803	0.00327	0.47706	0.003318	2
308	47	Wang M	2015	10.1016/j.fcr.2014.12.040	wheat	Cereals	Cwa	Warm temperate	Winter dry	Yanglinqianyang	China	108.085	34.2721	3									7.19906	Neutral		COS	Chi	1	Foliar	1	0	3	0.43803	0.00327	0.48603	0.002853	2
309	47	Wang M	2015	10.1016/j.fcr.2014.12.042	wheat	Cereals	Cwa	Warm temperate	Winter dry	Yanglinqianyang	China	108.085	34.2721	3									7.19906	Neutral		COS	Chi	1	Foliar	1	0	3	0.43803	0.00327	0.45757	0.003366	2
310	47	Wang M	2015	10.1016/j.fcr.2014.12.044	wheat	Cereals	Cwa	Warm temperate	Winter dry	Yanglinqianyang	China	108.085	34.2721	3									7.19906	Neutral		COS	Chi	1	Foliar	1	0	3	0.41585	0.003084	0.45271	0.003192	2
311	47	Wang M	2015	10.1016/j.fcr.2014.12.046	wheat	Cereals	Cwa	Warm temperate	Winter dry	Yanglinqianyang	China	108.085	34.2721	3									7.19906	Neutral		COS	Chi	1	Foliar	1	0	3	0.41585	0.003084	0.46167	0.003149	2
312	47	Wang M	2015	10.1016/j.fcr.2014.12.048	wheat	Cereals	Cwa	Warm temperate	Winter dry	Yanglinqianyang	China	108.085	34.2721	3									7.19906	Neutral		COS	Chi	1	Foliar	1	0	3	0.41585	0.003084	0.43745	0.002723	2
313	47	Wang M	2015	10.1016/j.fcr.2014.12.050	wheat	Cereals	Cwa	Warm temperate	Winter dry	Yanglinqianyang	China	108.085	34.2721	3									7.19906	Neutral		COS	Chi	1	Foliar	1	0	3	0.43974	0.00351	0.45645	0.002925	2
314	48	El-Sharony TF	2015	104172/2376-03541000162	Mango	Fruits	BWh	Arid	Desert	El-Nobaria region Behera Governorate	Egypt	30.3436	30.8481	3											Sand		SWE	0	Foliar	1	0	4	0.772667	0.12749	1.11	0.18315	1
315	48	El-Sharony TF	2015	104172/2376-03541000162	Mango	Fruits	BWh	Arid	Desert	El-Nobaria region Behera Governorate	Egypt	30.3436	30.8481	3											Sand	Roselle extract	PE	0	Foliar	1	0	4	0.772667	0.12749	0.849333	0.14014	1
316	48	El-Sharony TF	2015	104172/2376-03541000162	Mango	Fruits	BWh	Arid	Desert	El-Nobaria region Behera Governorate	Egypt	30.3436	30.8481	3											Sand	Garlic extract	PE	0	Foliar	1	0	4	0.772667	0.12749	0.85	0.14025	1
317	48	El-Sharony TF	2015	104172/2376-03541000162	Mango	Fruits	BWh	Arid	Desert	El-Nobaria region Behera Governorate	Egypt	30.3436	30.8481	3											Sand		SWE	0	Foliar	1	0	4	0.818	0.13497	1.26667	0.209	2
318	48	El-Sharony TF	2015	104172/2376-03541000162	Mango	Fruits	BWh	Arid	Desert	El-Nobaria region Behera Governorate	Egypt	30.3436	30.8481	3											Sand	Roselle extract	PE	0	Foliar	1	0	4	0.818	0.13497	0.996667	0.16445	2
319	48	El-Sharony TF	2015	104172/2376-03541000162	Mango	Fruits	BWh	Arid	Desert	El-Nobaria region Behera Governorate	Egypt	30.3436	30.8481	3											Sand	Garlic extract	PE	0	Foliar	1	0	4	0.818	0.13497	1.038	0.17127	2
320	49	Garmendia, A.	2018	10.7717/peerj.4729	potato	Root/tuber crops	Am	Equatorial	Monsoonal	Valencia	Spain	-61.1971	10.6538	6	0.08		134.2	Optimal			0.93867	Nonsaline	8.7	Strongly alkaline	Silty clay loam	nettle slurry	PE	0	Foliar	0.5	1	3	2.35	0.223485	2.16	0.205416	0
321	49	Garmendia, A.	2018	10.7717/peerj.4729	potato	Root/tuber crops	Am	Equatorial	Monsoonal	Valencia	Spain	-61.1971	10.6538	6	0.08		134.2	Optimal			0.93867	Nonsaline	8.7	Strongly alkaline	Silty clay loam	nettle slurry	PE	0	Foliar	0.25	1	3	2.35	0.223485	2.33	0.221583	0
322	49	Garmendia, A.	2018	10.7717/peerj.4729	potato	Root/tuber crops	Am	Equatorial	Monsoonal	Valencia	Spain	-61.1971	10.6538	6	0.08		134.2	Optimal			0.93867	Nonsaline	8.7	Strongly alkaline	Silty clay loam	nettle slurry	PE	0	Foliar	1	1	3	2.35	0.223485	2.27	0.215877	0
323	50	Mehrafari A	2015		Lemon Balm	Others	Csa	Warm temperate	Summer dry	Karaj	Iran	50.9391	35.84	3	0.08		36.2	Optimal	498	Optimal	1.8189	Nonsaline	7.89571	Moderately alkaline		Aminolforte	PHs	1	Foliar	1	0	3	0.1457	0.0128799	0.1618	0.0143031	0
324	50	Mehrafari A	2015		Lemon Balm	Others	Csa	Warm temperate	Summer dry	Karaj	Iran	50.9391	35.84	3	0.08		36.2	Optimal	498	Optimal	1.8189	Nonsaline	7.89571	Moderately alkaline		Kadostim	PHs	1	Foliar	1	0	3	0.1457	0.0128799	0.1537	0.0135871	0
325	50	Mehrafari A	2015		Lemon Balm	Others	Csa	Warm temperate	Summer dry	Karaj	Iran	50.9391	35.84	3	0.08		36.2	Optimal	498	Optimal	1.8189	Nonsaline	7.89571	Moderately alkaline		Fosnutren	PHs	1	Foliar	1	0	3	0.1457	0.0128799	0.1934	0.0170966	0
326	50	Mehrafari A	2015		Lemon Balm	Others	Csa	Warm temperate	Summer dry	Karaj	Iran	50.9391	35.84	3	0.08		36.2	Optimal	498	Optimal	1.8189	Nonsaline	7.89571	Moderately alkaline		Humiforte	PHs	1	Foliar	1	0	3	0.1457	0.0128799	0.1516	0.0134014	0
327	51	Abood, M. A.	2019	10.24326/asphc.2019.2.2	okra	Vegetables	BSh	Arid	Steppe	Diyala	Iraq	45.1495	33.7733	3		54.01	8.04	Very low	81.79	Low	13.9335	Strongly saline			Silt loam	Tecamin max	PHs	1	Foliar	0.5	1	3	0.7237	0.0699818	0.9866	0.0954042	0
328	51	Abood, M. A.	2019	10.24326/asphc.2019.2.2	okra	Vegetables	BSh	Arid	Steppe	Diyala	Iraq	45.1495	33.7733	3		54.01	8.04	Very low	81.79	Low	13.9335	Strongly saline			Silt loam	Tecamin max	PHs	1	Foliar	1	1	3	0.7237	0.0699818	0.9431	0.0911978	0
329	52	Suh Hye Young	2014	101007/s13580-014-0005-x	potato	Root/tuber crops	Cwa	Warm temperate	Winter dry	Gyeongsan	South Korea	128.742	35.8251	3												Fulvic acid	HFA	1	Foliar	0.5	1	3	2.59	0.246309	2.67	0.253917	0
330	52	Suh Hye Young	2014	101007/s13580-014-0005-x	potato	Root/tuber crops	Cwa	Warm temperate	Winter dry	Gyeongsan	South Korea	128.742	35.8251	3												Fulvic acid	HFA	1	Foliar	0.67	1	3	2.59	0.246309	2.34	0.222534	0
331	52	Suh Hye Young	2014	101007/s13580-014-0005-x	potato	Root/tuber crops	Cwa	Warm temperate	Winter dry	Gyeongsan	South Korea	128.742	35.8251	3												Fulvic acid	HFA	1	Foliar	1	1	3	2.59	0.246309	2.74	0.260574	0
332	52	Suh Hye Young	2014	101007/s13580-014-0005-x	potato	Root/tuber crops	Cwa	Warm temperate	Winter dry	Gyeongsan	South Korea	128.742	35.8251	3												Natural Fulvic acid	HFA	1	Soil	0.5	1	1	2.7	0.25677	2.7	0.25677	0
333	52	Suh Hye Young	2014	101007/s13580-014-0005-x	potato	Root/tuber crops	Cwa	Warm temperate	Winter dry	Gyeongsan	South Korea	128.742	35.8251	3												Natural Fulvic acid	HFA	1	Soil	1	1	1	2.7	0.25677	3	0.2853	0
334	53	Shalaby Tarek A	2014		garlic	Vegetables	BWh	Arid	Desert	El-Gharbia Governorate	Egypt	31.0335	30.8754	3												yeast	PHs	0	Foliar	1	0	4	1.52381	0.147352	2.14286	0.207214	1
335	53	Shalaby Tarek A	2014		garlic	Vegetables	BWh	Arid	Desert	El-Gharbia Governorate	Egypt	31.0335	30.8754	3												alga 600	SWE	1	Foliar	1	0	4	1.52381	0.147352	1.7381	0.168074	1
336	53	Shalaby Tarek A	2014		garlic	Vegetables	BWh	Arid	Desert	El-Gharbia Governorate	Egypt	31.0335	30.8754	3												Animo ruter	PHs	1	Foliar	1	0	4	1.52381	0.147352	1.97619	0.191098	1
337	53	Shalaby Tarek A	2014		garlic	Vegetables	BWh	Arid	Desert	El-Gharbia Governorate	Egypt	31.0335	30.8754	3												animo total	PHs	1	Foliar	1	0	4	1.52381	0.147352	2.33333	0.225633	1
338	53	Shalaby Tarek A	2014		garlic	Vegetables	BWh	Arid	Desert	El-Gharbia Governorate	Egypt	31.0335	30.8754	3												spiruli	PE	0	Foliar	1	0	4	1.52381	0.147352	1.61905	0.156562	1
339	53	Shalaby Tarek A	2014		garlic	Vegetables	BWh	Arid	Desert	El-Gharbia Governorate	Egypt	31.0335	30.8754	3												yeast	PHs	0	Foliar	1	0	4	1.40476	0.13584	2.2381	0.216424	2
340	53	Shalaby Tarek A	2014		garlic	Vegetables	BWh	Arid	Desert	El-Gharbia Governorate	Egypt	31.0335	30.8754	3												alga 600	SWE	1	Foliar	1	0	4	1.40476	0.13584	1.97619	0.191098	2
341	53	Shalaby Tarek A	2014		garlic	Vegetables	BWh	Arid	Desert	El-Gharbia Governorate	Egypt	31.0335	30.8754	3												Animo ruter	PHs	1	Foliar	1	0	4	1.40476	0.13584	1.83333	0.177283	2
342	53	Shalaby Tarek A	2014		garlic	Vegetables	BWh	Arid	Desert	El-Gharbia Governorate	Egypt	31.0335	30.8754	3												animo total	PHs	1	Foliar	1	0	4	1.40476	0.13584	2.11905	0.204912	2
343	53	Shalaby Tarek A	2014		garlic	Vegetables	BWh	Arid	Desert	El-Gharbia Governorate	Egypt	31.0335	30.8754	3												spiruli	PE	0	Foliar	1	0	4	1.40476	0.13584	1.64286	0.158864	2
344	54	Sabir Ali	2014	101016/jscienta201405021	grape	Fruits	Csb	Warm temperate	Summer dry	Central Atolia	Turkey	32.8619	39.8747	3							5.7534	Moderately saline	7.49616	Moderately alkaline	Clay loam		SWE	0	Foliar	1	0	4	0.609053	0.21865	0.615226	0.220866	1
345	54	Sabir Ali	2014	101016/jscienta201405021	grape	Fruits	Csb	Warm temperate	Summer dry	Central Atolia	Turkey	32.8619	39.8747	3							5.7534	Moderately saline	7.49616	Moderately alkaline	Clay loam		SWE	0	Foliar	1	0	4	0.107613	0.0386331	0.107202	0.0384854	2
346	55	Osman Hany Samir	2014	105829/idosijhsop2014631148	eggplant	Vegetables	BWh	Arid	Desert	Cairo	Egypt	31.2357	30.0444	3		30	71	Optimal	752	Optimal	1.8189	Nonsaline	7.49616	Moderately alkaline	Clay loam		SWE	0	Foliar	0.25	1	5	6.31429	0.610591	7.25714	0.701766	1
347	55	Osman Hany Samir	2014	105829/idosijhsop2014631150	eggplant	Vegetables	BWh	Arid	Desert	Cairo	Egypt	31.2357	30.0444	3		30	71	Optimal	752	Optimal	1.8189	Nonsaline	7.49616	Moderately alkaline	Clay loam		SWE	0	Foliar	0.5	1	5	6.31429	0.610591	8.52143	0.824022	1
348	55	Osman Hany Samir	2014	105829/idosijhsop2014631152	eggplant	Vegetables	BWh	Arid	Desert	Cairo	Egypt	31.2357	30.0444	3		30	71	Optimal	752	Optimal	1.8189	Nonsaline	7.49616	Moderately alkaline	Clay loam		SWE	0	Foliar	1	1	5	6.31429	0.610591	8.02143	0.775672	1
349	55	Osman Hany Samir	2014	105829/idosijhsop2014631154	eggplant	Vegetables	BWh	Arid	Desert	Cairo	Egypt	31.2357	30.0444	3		50	88	Optimal	488	Optimal	2.1117	Slightly saline	7.40395	Moderately alkaline	Clay loam		SWE	0	Foliar	0.25	1	5	6.0881	0.588719	7.39762	0.71535	2
350	55	Osman Hany Samir	2014	105829/idosijhsop2014631156	eggplant	Vegetables	BWh	Arid	Desert	Cairo	Egypt	31.2357	30.0444	3		50	88	Optimal	488	Optimal	2.1117	Slightly saline	7.40395	Moderately alkaline	Clay loam		SWE	0	Foliar	0.5	1	5	6.0881	0.588719	8.12619	0.785803	2
351	55	Osman Hany Samir	2014	105829/idosijhsop2014631158	eggplant	Vegetables	BWh	Arid	Desert	Cairo	Egypt	31.2357	30.0444	3		50	88	Optimal	488	Optimal	2.1117	Slightly saline	7.40395	Moderately alkaline	Clay loam		SWE	0	Foliar	1	1	5	6.0881	0.588719	8.12857	0.786033	2
352	56	Lola-Luz T	2014		broccoli	Vegetables	Cfb	Warm temperate	Fully humid	Dublin	Ireland	-6.26031	53.3498	6											Loam	AlgaeGreen	SWE	1	Foliar	0.01	1	5	5.474	0.529336	5.486	0.530496	0
353	56	Lola-Luz T	2014		broccoli	Vegetables	Cfb	Warm temperate	Fully humid	Dublin	Ireland	-6.26031	53.3498	6											Loam	AlgaeGreen	SWE	1	Foliar	0.1	1	5	5.474	0.529336	5.349	0.517248	0
354	56	Lola-Luz T	2014		broccoli	Vegetables	Cfb	Warm temperate	Fully humid	Dublin	Ireland	-6.26031	53.3498	6											Loam	AlgaeGreen	SWE	1	Foliar	1	1	5	5.474	0.529336	5.853	0.565985	0
355	56	Lola-Luz T	2014		broccoli	Vegetables	Cfb	Warm temperate	Fully humid	Dublin	Ireland	-6.26031	53.3498	6											Loam	AlgaeGreen	SWE	1	Foliar	0.01	1	5	1.67	0.161489	1.36	0.131512	0
356	56	Lola-Luz T	2014		broccoli	Vegetables	Cfb	Warm temperate	Fully humid	Dublin	Ireland	-6.26031	53.3498	6											Loam	AlgaeGreen	SWE	1	Foliar	0.1	1	5	1.67	0.161489	1.47	0.142149	0
357	56	Lola-Luz T	2014		broccoli	Vegetables	Cfb	Warm temperate	Fully humid	Dublin	Ireland	-6.26031	53.3498	6											Loam	AlgaeGreen	SWE	1	Foliar	1	1	5	1.67	0.161489	2.19	0.211773	0
358	57	Hussein NM	2014		tomato	Vegetables	BWh	Arid	Desert	Minia governorate	Egypt	30.5279	28.2847	3												Lemon grass	PE	0	Foliar	1	0	3	4.52619	0.437683	7.1881	0.695089	1
359	57	Hussein NM	2014		tomato	Vegetables	BWh	Arid	Desert	Minia governorate	Egypt	30.5279	28.2847	3												Garlic extract	PE	0	Foliar	1	0	3	4.52619	0.437683	9.87143	0.954567	1
360	57	Hussein NM	2014		tomato	Vegetables	BWh	Arid	Desert	Minia governorate	Egypt	30.5279	28.2847	3												Lemon grass	PE	0	Foliar	1	0	3	6.1881	0.598389	6.12381	0.592172	2
361	57	Hussein NM	2014		tomato	Vegetables	BWh	Arid	Desert	Minia governorate	Egypt	30.5279	28.2847	3												Garlic extract	PE	0	Foliar	1	0	3	6.1881	0.598389	8.77381	0.848427	2
362	58	Alam Mohammed Zahidul	2014	104141/CJPS2013-136	carrot	Vegetables	Dfb	Boreal	Fully humid	Berwick	Canada	-76.2333	41.0545	3											Silt loam	Acadian	SWE	1	Foliar	0.25	1	5	0.1832	0.008	0.2056	0.0096	1
363	58	Alam Mohammed Zahidul	2014	104141/CJPS2013-138	carrot	Vegetables	Dfb	Boreal	Fully humid	Berwick	Canada	-76.2333	41.0545	3											Silt loam	Acadian	SWE	1	Foliar	0.5	1	5	0.1832	0.008	0.2224	0.008	1
364	58	Alam Mohammed Zahidul	2014	104141/CJPS2013-140	carrot	Vegetables	Dfb	Boreal	Fully humid	Berwick	Canada	-76.2333	41.0545	3											Silt loam	Acadian	SWE	1	Foliar	0.75	1	5	0.1832	0.008	0.2224	0.0256	1
365	58	Alam Mohammed Zahidul	2014	104141/CJPS2013-142	carrot	Vegetables	Dfb	Boreal	Fully humid	Berwick	Canada	-76.2333	41.0545	3											Silt loam	Acadian	SWE	1	Foliar	1	1	5	0.1832	0.008	0.2224	0.016	1
366	58	Alam Mohammed Zahidul	2014	104141/CJPS2013-144	carrot	Vegetables	Dfb	Boreal	Fully humid	Berwick	Canada	-76.2333	41.0545	3											Silt loam	Acadian	SWE	1	Foliar	0.25	1	5	0.1696	0.0048	0.1832	0.008	2
367	58	Alam Mohammed Zahidul	2014	104141/CJPS2013-146	carrot	Vegetables	Dfb	Boreal	Fully humid	Berwick	Canada	-76.2333	41.0545	3											Silt loam	Acadian	SWE	1	Foliar	0.5	1	5	0.1696	0.0048	0.1992	0.008	2
368	58	Alam Mohammed Zahidul	2014	104141/CJPS2013-148	carrot	Vegetables	Dfb	Boreal	Fully humid	Berwick	Canada	-76.2333	41.0545	3											Silt loam	Acadian	SWE	1	Foliar	0.75	1	5	0.1696	0.0048	0.212	0.0104	2
369	58	Alam Mohammed Zahidul	2014	104141/CJPS2013-150	carrot	Vegetables	Dfb	Boreal	Fully humid	Berwick	Canada	-76.2333	41.0545	3											Silt loam	Acadian	SWE	1	Foliar	1	1	5	0.1696	0.0048	0.1816	0.016	2
370	59	Shah M T	2013		wheat	Cereals	BSh	Arid	Steppe	Gujarat	India	71.1924	22.2587	4							0.4647	Nonsaline	7.70106	Moderately alkaline	Sandy loam	Kappaphycus alvarezii	SWE	0	Foliar	0.25	1	4	0.38	0.01615	0.414	0.017595	0
371	59	Shah M T	2013		wheat	Cereals	BSh	Arid	Steppe	Gujarat	India	71.1924	22.2587	4							0.4647	Nonsaline	7.70106	Moderately alkaline	Sandy loam	Kappaphycus alvarezii	SWE	0	Foliar	0.5	1	4	0.38	0.01615	0.429	0.0182325	0
372	59	Shah M T	2013		wheat	Cereals	BSh	Arid	Steppe	Gujarat	India	71.1924	22.2587	4							0.4647	Nonsaline	7.70106	Moderately alkaline	Sandy loam	Kappaphycus alvarezii	SWE	0	Foliar	0.75	1	4	0.38	0.01615	0.455	0.0193375	0
373	59	Shah M T	2013		wheat	Cereals	BSh	Arid	Steppe	Gujarat	India	71.1924	22.2587	4							0.4647	Nonsaline	7.70106	Moderately alkaline	Sandy loam	Kappaphycus alvarezii	SWE	0	Foliar	1	1	4	0.38	0.01615	0.416	0.01768	0
374	59	Shah M T	2013		wheat	Cereals	BSh	Arid	Steppe	Gujarat	India	71.1924	22.2587	4							0.4647	Nonsaline	7.70106	Moderately alkaline	Sandy loam	Gracilaria edulis	SWE	0	Foliar	0.25	1	4	0.38	0.01615	0.383	0.0162775	0
375	59	Shah M T	2013		wheat	Cereals	BSh	Arid	Steppe	Gujarat	India	71.1924	22.2587	4							0.4647	Nonsaline	7.70106	Moderately alkaline	Sandy loam	Gracilaria edulis	SWE	0	Foliar	0.5	1	4	0.38	0.01615	0.43	0.018275	0
376	59	Shah M T	2013		wheat	Cereals	BSh	Arid	Steppe	Gujarat	India	71.1924	22.2587	4							0.4647	Nonsaline	7.70106	Moderately alkaline	Sandy loam	Gracilaria edulis	SWE	0	Foliar	0.75	1	4	0.38	0.01615	0.422	0.017935	0
377	59	Shah M T	2013		wheat	Cereals	BSh	Arid	Steppe	Gujarat	India	71.1924	22.2587	4							0.4647	Nonsaline	7.70106	Moderately alkaline	Sandy loam	Gracilaria edulis	SWE	0	Foliar	1	1	4	0.38	0.01615	0.383	0.0162775	0
378	60	Aghaei, K.	2019	10.1016/j.bcab.2019.101318	hyssop	Others	Csa	Warm temperate	Summer dry	Shahrekord	Iran	50.8769	32.3282	3	0.05		14.8	Very low	238	Optimal	2.0202		7.93669	Moderately alkaline	Clay	L-phenylalanine	PHs	0	Foliar	0.5	1	3	0.83	0.01	1.12	0.05	1
379	60	Aghaei, K.	2019	10.1016/j.bcab.2019.101318	hyssop	Others	Csa	Warm temperate	Summer dry	Shahrekord	Iran	50.8769	32.3282	3	0.05		14.8	Very low	238	Optimal	2.0202		7.93669	Moderately alkaline	Clay	L-phenylalanine	PHs	0	Foliar	1	1	3	0.83	0.01	1.14	0.02	1
380	60	Aghaei, K.	2019	10.1016/j.bcab.2019.101318	hyssop	Others	Csa	Warm temperate	Summer dry	Shahrekord	Iran	50.8769	32.3282	3	0.05		14.8	Very low	238	Optimal	2.0202		7.93669	Moderately alkaline	Clay	L-phenylalanine	PHs	0	Foliar	0.5	1	3	1.63	0.12	1.55	0.04	2
381	60	Aghaei, K.	2019	10.1016/j.bcab.2019.101318	hyssop	Others	Csa	Warm temperate	Summer dry	Shahrekord	Iran	50.8769	32.3282	3	0.05		14.8	Very low	238	Optimal	2.0202		7.93669	Moderately alkaline	Clay	L-phenylalanine	PHs	0	Foliar	1	1	3	1.63	0.12	1.91	0.04	2
382	61	Wolski K	2019	105601/jelem20182321570	grass mixure	Others	Cfb	Warm temperate	Fully humid	Wroclaw-Swojec	Poland	17.1458	51.1137	3									6.60486	Neutral	Sandy loam	Bio-Algeen	SWE	1	Foliar	1	0	3	0.293103	0.0351724	0.374713	0.0449655	0
383	61	Wolski K	2019	105601/jelem20182321572	grass mixure	Others	Cfb	Warm temperate	Fully humid	Wroclaw-Swojec	Poland	17.1458	51.1137	3									6.60486	Neutral	Sandy loam	Bio-Algeen	SWE	1	Foliar	1	0	3	0.337931	0.0405517	0.412644	0.0495172	0
384	61	Wolski K	2019	105601/jelem20182321574	grass mixure	Others	Cfb	Warm temperate	Fully humid	Wroclaw-Swojec	Poland	17.1458	51.1137	3									6.60486	Neutral	Sandy loam	Bio-Algeen	SWE	1	Foliar	1	0	3	0.578161	0.0693793	0.802299	0.0962759	0
385	62	Semida W M	2019	101080/1462031620191592712	onion	Vegetables	BWh	Arid	Desert	Cairo	Egypt	31.2357	30.0444	6	0.04		531.2	Optimal	70.1	Low	8.81	Strongly saline	7.6	Moderately alkaline	Sandy loam	diluted bee-honey extract	PHs	0	Foliar	0.5	1	2	3.78	0.09	5.71	0.021	0
386	62	Semida W M	2019	101080/1462031620191592714	onion	Vegetables	BWh	Arid	Desert	Cairo	Egypt	31.2357	30.0444	6	0.04		531.2	Optimal	70.1	Low	8.81	Strongly saline	7.6	Moderately alkaline	Sandy loam	diluted bee-honey extract	PHs	0	Foliar	1	1	2	3.78	0.09	6.52	0.024	0
387	62	Semida W M	2019	101080/1462031620191592716	onion	Vegetables	BWh	Arid	Desert	Cairo	Egypt	31.2357	30.0444	6	0.04		531.2	Optimal	70.1	Low	8.81	Strongly saline	7.6	Moderately alkaline	Sandy loam	diluted bee-honey extract	PHs	0	Foliar	0.5	1	2	3.4	0.019	5.39	0.021	0
388	62	Semida W M	2019	101080/1462031620191592718	onion	Vegetables	BWh	Arid	Desert	Cairo	Egypt	31.2357	30.0444	6	0.04		531.2	Optimal	70.1	Low	8.81	Strongly saline	7.6	Moderately alkaline	Sandy loam	diluted bee-honey extract	PHs	0	Foliar	1	1	2	3.4	0.019	6.58	0.031	0
389	63	Schoebitz M	2019	101080/0010362420191667375	blueberry	Fruits	Csb	Warm temperate	Summer dry	El Nogal	Chile	-70.6427	-33.5607	5		11.6	77	Optimal	406	Optimal			6.69706	Neutral		Biosolve	HFA	1	Soil	1	1	1	2.88889	0.222222	3.33333	0.555556	0
390	64	Ruban S J	2019		eggplant	Vegetables	Aw	Equatorial	Winter dry	Karur district of Tamil du	India	78.1564	10.8855	3													SWE	0	Foliar	0.5	1	1	2.14	0.206938	4.98	0.481566	0
391	64	Ruban S J	2019		eggplant	Vegetables	Aw	Equatorial	Winter dry	Karur district of Tamil du	India	78.1564	10.8855	3													SWE	0	Foliar	1	1	1	2.14	0.206938	5.58	0.539586	0
392	64	Ruban S J	2019		eggplant	Vegetables	Aw	Equatorial	Winter dry	Karur district of Tamil du	India	78.1564	10.8855	3													HFA	0	Foliar	0.5	1	1	2.14	0.206938	5.84	0.564728	0
393	64	Ruban S J	2019		eggplant	Vegetables	Aw	Equatorial	Winter dry	Karur district of Tamil du	India	78.1564	10.8855	3													HFA	0	Foliar	1	1	1	2.14	0.206938	6.54	0.632418	0
394	65	Rady M M	2019	101016/jsajb201811020	bean	Legumes	BWh	Arid	Desert	El-Noubaria	Egypt	29.8641	31.1565	9		58	8.8	Very low	97.7	Medium	13.1283	Strongly saline	7.10685	Neutral	Loam	licorice root extract	PE	0	Foliar	1	0	3	0.323	0.022	0.482	0.035	1
395	65	Rady M M	2019	101016/jsajb201811022	bean	Legumes	BWh	Arid	Desert	El-Noubaria	Egypt	29.8641	31.1565	9		58	8.8	Very low	97.7	Medium	13.1283	Strongly saline	7.10685	Neutral	Loam	licorice root extract	PE	0	Seed	1	0	1	0.323	0.022	0.749	0.049	1
396	65	Rady M M	2019	101016/jsajb201811024	bean	Legumes	BWh	Arid	Desert	El-Noubaria	Egypt	29.8641	31.1565	9		58.4	8.9	Very low	99	Medium	13.2381	Strongly saline	7.16832	Neutral	Loam	licorice root extract	PE	0	Foliar	1	0	3	0.328	0.027	0.516	0.039	2
397	65	Rady M M	2019	101016/jsajb201811026	bean	Legumes	BWh	Arid	Desert	El-Noubaria	Egypt	29.8641	31.1565	9		58.4	8.9	Very low	99	Medium	13.2381	Strongly saline	7.16832	Neutral	Loam	licorice root extract	PE	0	Seed	1	0	1	0.328	0.027	0.773	0.048	2
398	66	Kiczorowski P	2019	1024326/asphc2019121	apple	Fruits	Dfb	Boreal	Fully humid	Podkarpackie	Poland	22.0896	50.0575	4		93	160	Optimal	153	Optimal			5.30376	Moderately acid		BioFeed	SWE	1	Foliar	1	0	2	1.75333	0.2893	2.94333	0.48565	0
399	66	Kiczorowski P	2019	1024326/asphc2019123	apple	Fruits	Dfb	Boreal	Fully humid	Podkarpackie	Poland	22.0896	50.0575	4		93	160	Optimal	153	Optimal			5.30376	Moderately acid		stillage from yeast	PHs	1	Foliar	1	0	2	1.75333	0.2893	2.05333	0.3388	0
400	66	Kiczorowski P	2019	1024326/asphc2019125	apple	Fruits	Dfb	Boreal	Fully humid	Podkarpackie	Poland	22.0896	50.0575	4		93	160	Optimal	153	Optimal			5.30376	Moderately acid		BioFeed	SWE	1	Foliar	1	0	2	1.16	0.1914	2.01	0.33165	0
401	66	Kiczorowski P	2019	1024326/asphc2019127	apple	Fruits	Dfb	Boreal	Fully humid	Podkarpackie	Poland	22.0896	50.0575	4		93	160	Optimal	153	Optimal			5.30376	Moderately acid		stillage from yeast	PHs	1	Foliar	1	0	2	1.16	0.1914	1.52333	0.25135	0
402	66	Kiczorowski P	2019	1024326/asphc2019129	apple	Fruits	Dfb	Boreal	Fully humid	Podkarpackie	Poland	22.0896	50.0575	4		93	160	Optimal	153	Optimal			5.30376	Moderately acid		BioFeed	SWE	1	Foliar	1	0	2	1.37333	0.2266	2.05667	0.33935	0
403	66	Kiczorowski P	2019	1024326/asphc2019131	apple	Fruits	Dfb	Boreal	Fully humid	Podkarpackie	Poland	22.0896	50.0575	4		93	160	Optimal	153	Optimal			5.30376	Moderately acid		stillage from yeast	PHs	1	Foliar	1	0	2	1.37333	0.2266	1.69667	0.27995	0
404	66	Kiczorowski P	2019	1024326/asphc2019133	apple	Fruits	Dfb	Boreal	Fully humid	Podkarpackie	Poland	22.0896	50.0575	4		93	160	Optimal	153	Optimal			5.30376	Moderately acid		BioFeed	SWE	1	Foliar	1	0	2	1.10333	0.18205	1.46	0.2409	0
405	66	Kiczorowski P	2019	1024326/asphc2019135	apple	Fruits	Dfb	Boreal	Fully humid	Podkarpackie	Poland	22.0896	50.0575	4		93	160	Optimal	153	Optimal			5.30376	Moderately acid		stillage from yeast	PHs	1	Foliar	1	0	2	1.10333	0.18205	1.27	0.20955	0
406	67	Karimzadeh Asl K	2019	101007/s11738-018-2801-x	dragonhead	Others	Csa	Warm temperate	Summer dry	Karaj	Iran	50.9391	35.84	3	0.08		13.5	Very low	180	Optimal	2.13	Slightly saline	7.8035	Moderately alkaline	Clay loam	zeolite	Si	0	Soil	1	0	1	0.3255	0.0287742	0.3478	0.0307455	1
407	67	Karimzadeh Asl K	2019	101007/s11738-018-2801-x	dragonhead	Others	Csa	Warm temperate	Summer dry	Karaj	Iran	50.9391	35.84	3	0.08		13.5	Very low	180	Optimal	2.13	Slightly saline	7.8035	Moderately alkaline	Clay loam	zeolite	Si	0	Soil	1	0	1	0.3285	0.0290394	0.3362	0.0297201	2
408	68	Ciepiela G A	2019	1015666/aeer/1705_1240712419	ryegrass	Others	Dfb	Boreal	Fully humid	Siedlce	Poland	22.2902	52.1676	3	0.13		170	Optimal	114	Medium			7.92644	Moderately alkaline	Sandy loam	Algex	SWE	1	Foliar	1	0	3	1.26	0.111384	1.77	0.156468	1
409	68	Ciepiela G A	2019	1015666/aeer/1705_1240712421	ryegrass	Others	Dfb	Boreal	Fully humid	Siedlce	Poland	22.2902	52.1676	3	0.13		170	Optimal	114	Medium			7.92644	Moderately alkaline	Sandy loam	Algex	SWE	1	Foliar	1	0	3	0.56	0.049504	1.08	0.095472	2
410	69	Szczepanek M	2018	1022616/rrd242018051	barley	Cereals	Cfb	Warm temperate	Fully humid	Kuyavian- Pomeranian voivodeship	Poland	18.4834	53.1648	4		6.9	190	Optimal	95	Medium			6.73804	Neutral		Kelpak	SWE	1	Foliar	0.67	1	1	0.5909	0.0251133	0.6141	0.0260993	0
411	69	Szczepanek M	2018	1022616/rrd242018053	barley	Cereals	Cfb	Warm temperate	Fully humid	Kuyavian- Pomeranian voivodeship	Poland	18.4834	53.1648	4		6.9	190	Optimal	95	Medium			6.73804	Neutral		Kelpak	SWE	1	Foliar	0.67	1	1	0.5909	0.0251133	0.5912	0.025126	0
412	69	Szczepanek M	2018	1022616/rrd242018055	barley	Cereals	Cfb	Warm temperate	Fully humid	Kuyavian- Pomeranian voivodeship	Poland	18.4834	53.1648	4		6.9	190	Optimal	95	Medium			6.73804	Neutral		Kelpak	SWE	1	Foliar	1	1	2	0.5909	0.0251133	0.5975	0.0253938	0
413	70	Szczepanek M	2018	1022616/ERDev201817N075	maize	Cereals	Cfb	Warm temperate	Fully humid	Bydgoszcz	Poland	18.0084	53.1235	4			190	Optimal	95	Medium			6.73706	Neutral		Kelpak	SWE	1	Foliar	0.67	1	1	1.081	0.0459425	1.0891	0.0462868	1
414	70	Szczepanek M	2018	1022616/ERDev201817N077	maize	Cereals	Cfb	Warm temperate	Fully humid	Bydgoszcz	Poland	18.0084	53.1235	4			190	Optimal	95	Medium			6.73706	Neutral		Kelpak	SWE	1	Foliar	0.67	1	1	1.081	0.0459425	1.1139	0.0473408	1
415	70	Szczepanek M	2018	1022616/ERDev201817N079	maize	Cereals	Cfb	Warm temperate	Fully humid	Bydgoszcz	Poland	18.0084	53.1235	4			190	Optimal	95	Medium			6.73706	Neutral		Kelpak	SWE	1	Foliar	1	1	2	1.081	0.0459425	1.1382	0.0483735	1
416	70	Szczepanek M	2018	1022616/ERDev201817N081	maize	Cereals	Cfb	Warm temperate	Fully humid	Bydgoszcz	Poland	18.0084	53.1235	4			190	Optimal	95	Medium			6.73706	Neutral		Kelpak	SWE	1	Foliar	0.67	1	1	0.6434	0.0273445	0.6704	0.028492	2
417	70	Szczepanek M	2018	1022616/ERDev201817N083	maize	Cereals	Cfb	Warm temperate	Fully humid	Bydgoszcz	Poland	18.0084	53.1235	4			190	Optimal	95	Medium			6.73706	Neutral		Kelpak	SWE	1	Foliar	0.67	1	1	0.6434	0.0273445	0.6493	0.0275953	2
418	70	Szczepanek M	2018	1022616/ERDev201817N085	maize	Cereals	Cfb	Warm temperate	Fully humid	Bydgoszcz	Poland	18.0084	53.1235	4			190	Optimal	95	Medium			6.73706	Neutral		Kelpak	SWE	1	Foliar	1	1	2	0.6434	0.0273445	0.6432	0.027336	2
419	70	Szczepanek M	2018	1022616/ERDev201817N087	maize	Cereals	Cfb	Warm temperate	Fully humid	Bydgoszcz	Poland	18.0084	53.1235	4			190	Optimal	95	Medium			6.73706	Neutral		Kelpak	SWE	1	Foliar	0.67	1	1	1.1738	0.0498865	1.2021	0.0510893	3
420	70	Szczepanek M	2018	1022616/ERDev201817N089	maize	Cereals	Cfb	Warm temperate	Fully humid	Bydgoszcz	Poland	18.0084	53.1235	4			190	Optimal	95	Medium			6.73706	Neutral		Kelpak	SWE	1	Foliar	0.67	1	1	1.1738	0.0498865	1.2213	0.0519053	3
421	70	Szczepanek M	2018	1022616/ERDev201817N091	maize	Cereals	Cfb	Warm temperate	Fully humid	Bydgoszcz	Poland	18.0084	53.1235	4			190	Optimal	95	Medium			6.73706	Neutral		Kelpak	SWE	1	Foliar	1	1	2	1.1738	0.0498865	1.2018	0.0510765	3
422	71	Rahman Mosaddiqur	2018	101371/jourlpone0203770	strawberry	Fruits	Aw	Equatorial	Winter dry	Bangabandhu Sheikh Mujibur Rahman	Bangladesh	90.401	24.0289	3	0.115		21.35	Low	93.6	Medium			6.7	Neutral		chitosan biopolymer	Chi	1	Foliar	0.125	1	5	2.64677	0.950192	3.39118	1.21743	0
423	71	Rahman Mosaddiqur	2018	101371/jourlpone0203772	strawberry	Fruits	Aw	Equatorial	Winter dry	Bangabandhu Sheikh Mujibur Rahman	Bangladesh	90.401	24.0289	3	0.115		21.35	Low	93.6	Medium			6.7	Neutral		chitosan biopolymer	Chi	1	Foliar	0.25	1	5	2.64677	0.950192	3.49462	1.25457	0
424	71	Rahman Mosaddiqur	2018	101371/jourlpone0203774	strawberry	Fruits	Aw	Equatorial	Winter dry	Bangabandhu Sheikh Mujibur Rahman	Bangladesh	90.401	24.0289	3	0.115		21.35	Low	93.6	Medium			6.7	Neutral		chitosan biopolymer	Chi	1	Foliar	0.5	1	5	2.64677	0.950192	3.78409	1.35849	0
425	71	Rahman Mosaddiqur	2018	101371/jourlpone0203776	strawberry	Fruits	Aw	Equatorial	Winter dry	Bangabandhu Sheikh Mujibur Rahman	Bangladesh	90.401	24.0289	3	0.115		21.35	Low	93.6	Medium			6.7	Neutral		chitosan biopolymer	Chi	1	Foliar	1	1	5	2.64677	0.950192	3.61871	1.29912	0
426	72	Radkowski A	2018	1017221/112/2018-PSE	timothy	Others	Cfb	Warm temperate	Fully humid	Krakow	Poland	19.945	50.0647	4			48	Optimal	132.2	Optimal			8.03914	Moderately alkaline		Microfert	PHs	1	Foliar	0.4	1	3	0.0994	0.0074	0.1003	0.007	1
427	72	Radkowski A	2018	1017221/112/2018-PSE	timothy	Others	Cfb	Warm temperate	Fully humid	Krakow	Poland	19.945	50.0647	4			48	Optimal	132.2	Optimal			8.03914	Moderately alkaline		Microfert	PHs	1	Foliar	0.67	1	3	0.0994	0.0074	0.1071	0.0085	1
428	72	Radkowski A	2018	1017221/112/2018-PSE	timothy	Others	Cfb	Warm temperate	Fully humid	Krakow	Poland	19.945	50.0647	4			48	Optimal	132.2	Optimal			8.03914	Moderately alkaline		Microfert	PHs	1	Foliar	1	1	3	0.0994	0.0074	0.1132	0.0062	1
429	72	Radkowski A	2018	1017221/112/2018-PSE	timothy	Others	Cfb	Warm temperate	Fully humid	Krakow	Poland	19.945	50.0647	4			48	Optimal	132.2	Optimal			8.03914	Moderately alkaline		Microfert	PHs	1	Foliar	0.4	1	3	0.082	0.0075	0.0875	0.0064	2
430	72	Radkowski A	2018	1017221/112/2018-PSE	timothy	Others	Cfb	Warm temperate	Fully humid	Krakow	Poland	19.945	50.0647	4			48	Optimal	132.2	Optimal			8.03914	Moderately alkaline		Microfert	PHs	1	Foliar	0.67	1	3	0.082	0.0075	0.0942	0.0068	2
431	72	Radkowski A	2018	1017221/112/2018-PSE	timothy	Others	Cfb	Warm temperate	Fully humid	Krakow	Poland	19.945	50.0647	4			48	Optimal	132.2	Optimal			8.03914	Moderately alkaline		Microfert	PHs	1	Foliar	1	1	3	0.082	0.0075	0.0948	0.0052	2
432	72	Radkowski A	2018	1017221/112/2018-PSE	timothy	Others	Cfb	Warm temperate	Fully humid	Krakow	Poland	19.945	50.0647	4			48	Optimal	132.2	Optimal			8.03914	Moderately alkaline		Microfert	PHs	1	Foliar	0.4	1	3	0.0809	0.0082	0.0838	0.0074	3
433	72	Radkowski A	2018	1017221/112/2018-PSE	timothy	Others	Cfb	Warm temperate	Fully humid	Krakow	Poland	19.945	50.0647	4			48	Optimal	132.2	Optimal			8.03914	Moderately alkaline		Microfert	PHs	1	Foliar	0.67	1	3	0.0809	0.0082	0.0888	0.0084	3
434	72	Radkowski A	2018	1017221/112/2018-PSE	timothy	Others	Cfb	Warm temperate	Fully humid	Krakow	Poland	19.945	50.0647	4			48	Optimal	132.2	Optimal			8.03914	Moderately alkaline		Microfert	PHs	1	Foliar	1	1	3	0.0809	0.0082	0.0915	0.0073	3
435	73	Matysiak K	2018	101590/0103-8478cr20180406	wheat	Cereals	Cfb	Warm temperate	Fully humid	Torun	Poland	18.5984	53.0138	4									5.6	Moderately acid		Kelpak	SWE	1	Foliar	1	0	1	0.727	0.0308975	0.654	0.027795	1
436	73	Matysiak K	2018	101590/0103-8478cr20180408	wheat	Cereals	Cfb	Warm temperate	Fully humid	Torun	Poland	18.5984	53.0138	4									5.6	Moderately acid		Kelpak	SWE	1	Foliar	1	0	1	0.727	0.0308975	0.615	0.0261375	1
437	73	Matysiak K	2018	101590/0103-8478cr20180410	wheat	Cereals	Cfb	Warm temperate	Fully humid	Torun	Poland	18.5984	53.0138	4									5.6	Moderately acid		Kelpak	SWE	1	Foliar	1	0	1	0.698	0.029665	0.754	0.032045	1
438	73	Matysiak K	2018	101590/0103-8478cr20180412	wheat	Cereals	Cfb	Warm temperate	Fully humid	Torun	Poland	18.5984	53.0138	4									5.6	Moderately acid		Kelpak	SWE	1	Foliar	1	0	1	0.698	0.029665	0.723	0.0307275	1
439	73	Matysiak K	2018	101590/0103-8478cr20180414	wheat	Cereals	Cfb	Warm temperate	Fully humid	Torun	Poland	18.5984	53.0138	4									5.6	Moderately acid		Kelpak	SWE	1	Foliar	1	0	1	0.674	0.028645	0.717	0.0304725	1
440	73	Matysiak K	2018	101590/0103-8478cr20180416	wheat	Cereals	Cfb	Warm temperate	Fully humid	Torun	Poland	18.5984	53.0138	4									5.6	Moderately acid		Kelpak	SWE	1	Foliar	1	0	1	0.674	0.028645	0.634	0.026945	1
441	74	Mattner S. W.	2018	101007/s10811-017-1387-10	strawberry	Fruits	Cfb	Warm temperate	Fully humid	Voctotria	Austrilia	144.831	-37.712	3		27	250	Optimal	510	Optimal	0.3549	Nonsaline	6.50241		Clay loam	Seasol	SWE	1	Seed	1	0	1	0.867	0.143055	1.034	0.17061	0
442	74	Mattner S. W.	2018	101007/s10811-017-1387-12	strawberry	Fruits	Cfb	Warm temperate	Fully humid	Voctotria	Austrilia	144.831	-37.712	3		20	130	Optimal	440	Optimal	0.483	Nonsaline	6.00041		Clay loam	Seasol	SWE	1	Seed	1	0	1	1.445	0.238425	1.567	0.258555	0
443	74	Mattner S. W.	2018	101007/s10811-017-1387-14	strawberry	Fruits	Cfb	Warm temperate	Fully humid	Voctotria	Austrilia	144.831	-37.712	3		20	140	Optimal	230	Optimal	0.4647	Nonsaline	7.19906	Neutral	Clay loam	Seasol	SWE	1	Soil	1	0	1	0.5028	0.082962	0.5476	0.090354	0
444	75	Kocira S	2018	103389/fpls201800389	soybean	Legumes	Dfb	Boreal	Fully humid	Perespa	Poland	23.636	50.6577	4			126	Optimal	153	Optimal			8.58211	Strongly alkaline		Fylloton	SWE	1	Foliar	0.7	1	1	0.2812	0.0376808	0.3073	0.0411782	1
445	75	Kocira S	2018	103389/fpls201800391	soybean	Legumes	Dfb	Boreal	Fully humid	Perespa	Poland	23.636	50.6577	4			126	Optimal	153	Optimal			8.58211	Strongly alkaline		Fylloton	SWE	1	Foliar	1	1	1	0.2812	0.0376808	0.3078	0.0412452	1
446	75	Kocira S	2018	103389/fpls201800393	soybean	Legumes	Dfb	Boreal	Fully humid	Perespa	Poland	23.636	50.6577	4			126	Optimal	153	Optimal			8.58211	Strongly alkaline		Fylloton	SWE	1	Foliar	0.7	1	2	0.2812	0.0376808	0.3151	0.0422234	1
447	75	Kocira S	2018	103389/fpls201800395	soybean	Legumes	Dfb	Boreal	Fully humid	Perespa	Poland	23.636	50.6577	4			126	Optimal	153	Optimal			8.58211	Strongly alkaline		Fylloton	SWE	1	Foliar	1	1	2	0.2812	0.0376808	0.3368	0.0451312	1
448	75	Kocira S	2018	103389/fpls201800397	soybean	Legumes	Dfb	Boreal	Fully humid	Perespa	Poland	23.636	50.6577	4			126	Optimal	153	Optimal			8.58211	Strongly alkaline		Fylloton	SWE	1	Foliar	0.7	1	1	0.2859	0.0383106	0.3324	0.0445416	2
449	75	Kocira S	2018	103389/fpls201800399	soybean	Legumes	Dfb	Boreal	Fully humid	Perespa	Poland	23.636	50.6577	4			126	Optimal	153	Optimal			8.58211	Strongly alkaline		Fylloton	SWE	1	Foliar	1	1	1	0.2859	0.0383106	0.3234	0.0433356	2
450	75	Kocira S	2018	103389/fpls201800401	soybean	Legumes	Dfb	Boreal	Fully humid	Perespa	Poland	23.636	50.6577	4			126	Optimal	153	Optimal			8.58211	Strongly alkaline		Fylloton	SWE	1	Foliar	0.7	1	2	0.2859	0.0383106	0.3152	0.0422368	2
451	75	Kocira S	2018	103389/fpls201800403	soybean	Legumes	Dfb	Boreal	Fully humid	Perespa	Poland	23.636	50.6577	4			126	Optimal	153	Optimal			8.58211	Strongly alkaline		Fylloton	SWE	1	Foliar	1	1	2	0.2859	0.0383106	0.3446	0.0461764	2
452	75	Kocira S	2018	103389/fpls201800405	soybean	Legumes	Dfb	Boreal	Fully humid	Perespa	Poland	23.636	50.6577	4			126	Optimal	153	Optimal			8.58211	Strongly alkaline		Fylloton	SWE	1	Foliar	0.7	1	1	0.2969	0.0397846	0.3963	0.0531042	3
453	75	Kocira S	2018	103389/fpls201800407	soybean	Legumes	Dfb	Boreal	Fully humid	Perespa	Poland	23.636	50.6577	4			126	Optimal	153	Optimal			8.58211	Strongly alkaline		Fylloton	SWE	1	Foliar	1	1	1	0.2969	0.0397846	0.3277	0.0439118	3
454	75	Kocira S	2018	103389/fpls201800409	soybean	Legumes	Dfb	Boreal	Fully humid	Perespa	Poland	23.636	50.6577	4			126	Optimal	153	Optimal			8.58211	Strongly alkaline		Fylloton	SWE	1	Foliar	0.7	1	2	0.2969	0.0397846	0.3156	0.0422904	3
455	75	Kocira S	2018	103389/fpls201800411	soybean	Legumes	Dfb	Boreal	Fully humid	Perespa	Poland	23.636	50.6577	4			126	Optimal	153	Optimal			8.58211	Strongly alkaline		Fylloton	SWE	1	Foliar	1	1	2	0.2969	0.0397846	0.3406	0.0456404	3
456	75	Kocira S	2018	103389/fpls201800413	soybean	Legumes	Dfb	Boreal	Fully humid	Perespa	Poland	23.636	50.6577	4			126	Optimal	153	Optimal			8.58211	Strongly alkaline		Fylloton	SWE	1	Foliar	0.7	1	1	0.3439	0.0460826	0.4326	0.0579684	1
457	75	Kocira S	2018	103389/fpls201800415	soybean	Legumes	Dfb	Boreal	Fully humid	Perespa	Poland	23.636	50.6577	4			126	Optimal	153	Optimal			8.58211	Strongly alkaline		Fylloton	SWE	1	Foliar	1	1	1	0.3439	0.0460826	0.4355	0.058357	1
458	75	Kocira S	2018	103389/fpls201800417	soybean	Legumes	Dfb	Boreal	Fully humid	Perespa	Poland	23.636	50.6577	4			126	Optimal	153	Optimal			8.58211	Strongly alkaline		Fylloton	SWE	1	Foliar	0.7	1	2	0.3439	0.0460826	0.4299	0.0576066	1
459	75	Kocira S	2018	103389/fpls201800419	soybean	Legumes	Dfb	Boreal	Fully humid	Perespa	Poland	23.636	50.6577	4			126	Optimal	153	Optimal			8.58211	Strongly alkaline		Fylloton	SWE	1	Foliar	1	1	2	0.3439	0.0460826	0.4497	0.0602598	1
460	75	Kocira S	2018	103389/fpls201800421	soybean	Legumes	Dfb	Boreal	Fully humid	Perespa	Poland	23.636	50.6577	4			126	Optimal	153	Optimal			8.58211	Strongly alkaline		Fylloton	SWE	1	Foliar	0.7	1	1	0.3215	0.043081	0.3307	0.0443138	2
461	75	Kocira S	2018	103389/fpls201800423	soybean	Legumes	Dfb	Boreal	Fully humid	Perespa	Poland	23.636	50.6577	4			126	Optimal	153	Optimal			8.58211	Strongly alkaline		Fylloton	SWE	1	Foliar	1	1	1	0.3215	0.043081	0.3252	0.0435768	2
462	75	Kocira S	2018	103389/fpls201800425	soybean	Legumes	Dfb	Boreal	Fully humid	Perespa	Poland	23.636	50.6577	4			126	Optimal	153	Optimal			8.58211	Strongly alkaline		Fylloton	SWE	1	Foliar	0.7	1	2	0.3215	0.043081	0.3812	0.0510808	2
463	75	Kocira S	2018	103389/fpls201800427	soybean	Legumes	Dfb	Boreal	Fully humid	Perespa	Poland	23.636	50.6577	4			126	Optimal	153	Optimal			8.58211	Strongly alkaline		Fylloton	SWE	1	Foliar	1	1	2	0.3215	0.043081	0.392	0.052528	2
464	75	Kocira S	2018	103389/fpls201800429	soybean	Legumes	Dfb	Boreal	Fully humid	Perespa	Poland	23.636	50.6577	4			126	Optimal	153	Optimal			8.58211	Strongly alkaline		Fylloton	SWE	1	Foliar	0.7	1	1	0.352	0.047168	0.3762	0.0504108	3
465	75	Kocira S	2018	103389/fpls201800431	soybean	Legumes	Dfb	Boreal	Fully humid	Perespa	Poland	23.636	50.6577	4			126	Optimal	153	Optimal			8.58211	Strongly alkaline		Fylloton	SWE	1	Foliar	1	1	1	0.352	0.047168	0.3583	0.0480122	3
466	75	Kocira S	2018	103389/fpls201800433	soybean	Legumes	Dfb	Boreal	Fully humid	Perespa	Poland	23.636	50.6577	4			126	Optimal	153	Optimal			8.58211	Strongly alkaline		Fylloton	SWE	1	Foliar	0.7	1	2	0.352	0.047168	0.3762	0.0504108	3
467	75	Kocira S	2018	103389/fpls201800435	soybean	Legumes	Dfb	Boreal	Fully humid	Perespa	Poland	23.636	50.6577	4			126	Optimal	153	Optimal			8.58211	Strongly alkaline		Fylloton	SWE	1	Foliar	1	1	2	0.352	0.047168	0.4137	0.0554358	3
468	75	Kocira S	2018	103389/fpls201800437	soybean	Legumes	Dfb	Boreal	Fully humid	Perespa	Poland	23.636	50.6577	4			126	Optimal	153	Optimal			8.58211	Strongly alkaline		Fylloton	SWE	1	Foliar	0.7	1	1	0.3631	0.0486554	0.4186	0.0560924	1
469	75	Kocira S	2018	103389/fpls201800439	soybean	Legumes	Dfb	Boreal	Fully humid	Perespa	Poland	23.636	50.6577	4			126	Optimal	153	Optimal			8.58211	Strongly alkaline		Fylloton	SWE	1	Foliar	1	1	1	0.3631	0.0486554	0.406	0.054404	1
470	75	Kocira S	2018	103389/fpls201800441	soybean	Legumes	Dfb	Boreal	Fully humid	Perespa	Poland	23.636	50.6577	4			126	Optimal	153	Optimal			8.58211	Strongly alkaline		Fylloton	SWE	1	Foliar	0.7	1	2	0.3631	0.0486554	0.4065	0.054471	1
471	75	Kocira S	2018	103389/fpls201800443	soybean	Legumes	Dfb	Boreal	Fully humid	Perespa	Poland	23.636	50.6577	4			126	Optimal	153	Optimal			8.58211	Strongly alkaline		Fylloton	SWE	1	Foliar	1	1	2	0.3631	0.0486554	0.4282	0.0573788	1
472	75	Kocira S	2018	103389/fpls201800445	soybean	Legumes	Dfb	Boreal	Fully humid	Perespa	Poland	23.636	50.6577	4			126	Optimal	153	Optimal			8.58211	Strongly alkaline		Fylloton	SWE	1	Foliar	0.7	1	1	0.3168	0.0424512	0.3567	0.0477978	2
473	75	Kocira S	2018	103389/fpls201800447	soybean	Legumes	Dfb	Boreal	Fully humid	Perespa	Poland	23.636	50.6577	4			126	Optimal	153	Optimal			8.58211	Strongly alkaline		Fylloton	SWE	1	Foliar	1	1	1	0.3168	0.0424512	0.4082	0.0546988	2
474	75	Kocira S	2018	103389/fpls201800449	soybean	Legumes	Dfb	Boreal	Fully humid	Perespa	Poland	23.636	50.6577	4			126	Optimal	153	Optimal			8.58211	Strongly alkaline		Fylloton	SWE	1	Foliar	0.7	1	2	0.3168	0.0424512	0.4018	0.0538412	2
475	75	Kocira S	2018	103389/fpls201800451	soybean	Legumes	Dfb	Boreal	Fully humid	Perespa	Poland	23.636	50.6577	4			126	Optimal	153	Optimal			8.58211	Strongly alkaline		Fylloton	SWE	1	Foliar	1	1	2	0.3168	0.0424512	0.4048	0.0542432	2
476	75	Kocira S	2018	103389/fpls201800453	soybean	Legumes	Dfb	Boreal	Fully humid	Perespa	Poland	23.636	50.6577	4			126	Optimal	153	Optimal			8.58211	Strongly alkaline		Fylloton	SWE	1	Foliar	0.7	1	1	0.3432	0.0459888	0.3849	0.0515766	3
477	75	Kocira S	2018	103389/fpls201800455	soybean	Legumes	Dfb	Boreal	Fully humid	Perespa	Poland	23.636	50.6577	4			126	Optimal	153	Optimal			8.58211	Strongly alkaline		Fylloton	SWE	1	Foliar	1	1	1	0.3432	0.0459888	0.4094	0.0548596	3
478	75	Kocira S	2018	103389/fpls201800457	soybean	Legumes	Dfb	Boreal	Fully humid	Perespa	Poland	23.636	50.6577	4			126	Optimal	153	Optimal			8.58211	Strongly alkaline		Fylloton	SWE	1	Foliar	0.7	1	2	0.3432	0.0459888	0.4111	0.0550874	3
479	75	Kocira S	2018	103389/fpls201800459	soybean	Legumes	Dfb	Boreal	Fully humid	Perespa	Poland	23.636	50.6577	4			126	Optimal	153	Optimal			8.58211	Strongly alkaline		Fylloton	SWE	1	Foliar	1	1	2	0.3432	0.0459888	0.4333	0.0580622	3
480	76	Gugala M	2018	1012911/22998993/89654	potato	Root/tuber crops	Dfb	Boreal	Fully humid	Siedlce	Poland	22.2902	52.1676	3												Kelpak	SWE	1	Foliar	1	0	2	4.369	0.415492	5.074	0.482537	1
481	76	Gugala M	2018	1012911/22998993/89654	potato	Root/tuber crops	Dfb	Boreal	Fully humid	Siedlce	Poland	22.2902	52.1676	3												Kelpak	SWE	1	Foliar	1	0	2	3.77	0.358527	3.817	0.362997	2
482	76	Gugala M	2018	1012911/22998993/89654	potato	Root/tuber crops	Dfb	Boreal	Fully humid	Siedlce	Poland	22.2902	52.1676	3												Kelpak	SWE	1	Foliar	1	0	2	3.707	0.352536	3.817	0.362997	3
483	77	Godlewska A	2019	1015666/aeer/1605_55715582	alfalfa	Others	Dfb	Boreal	Fully humid	Siedlce	Poland	22.2902	52.1676	3	0.13		170	Optimal	114	Medium			7.92644	Moderately alkaline		Algex	SWE	1	Foliar	1	0	3	0.47	0.041548	0.62	0.054808	0
484	78	Głosek-Sobieraj, Małgorzata	2018	101007/s10343-017-0407-8	potato	Root/tuber crops	Cfb	Warm temperate	Fully humid	Tomaszkowo	Poland	20.4063	53.7175	3	0.071		85.6	Optimal	104.2	Medium			4.93495	Strongly acid		Bio-Algeen S-90	SWE	1	Foliar	1	0	continuous	2.5379	0.606	2.7652	0.6818	1
485	78	Głosek-Sobieraj, Małgorzata	2018	101007/s10343-017-0407-10	potato	Root/tuber crops	Cfb	Warm temperate	Fully humid	Tomaszkowo	Poland	20.4063	53.7175	3	0.071		85.6	Optimal	104.2	Medium			4.93495	Strongly acid		Kelpak	SWE	1	Foliar	1	0	continuous	2.5379	0.606	2.9924	0.8334	1
486	78	Głosek-Sobieraj, Małgorzata	2018	101007/s10343-017-0407-12	potato	Root/tuber crops	Cfb	Warm temperate	Fully humid	Tomaszkowo	Poland	20.4063	53.7175	3	0.071		85.6	Optimal	104.2	Medium			4.93495	Strongly acid		Bio-Algeen S-90	SWE	1	Foliar	1	0	continuous	1.25	0.3788	1.3258	0.4546	2
487	78	Głosek-Sobieraj, Małgorzata	2018	101007/s10343-017-0407-14	potato	Root/tuber crops	Cfb	Warm temperate	Fully humid	Tomaszkowo	Poland	20.4063	53.7175	3	0.071		85.6	Optimal	104.2	Medium			4.93495	Strongly acid		Kelpak	SWE	1	Foliar	1	0	continuous	1.25	0.3788	1.4773	0.4546	2
488	78	Głosek-Sobieraj, Małgorzata	2018	101007/s10343-017-0407-16	potato	Root/tuber crops	Cfb	Warm temperate	Fully humid	Tomaszkowo	Poland	20.4063	53.7175	3	0.071		85.6	Optimal	104.2	Medium			4.93495	Strongly acid		Bio-Algeen S-90	SWE	1	Foliar	1	0	continuous	1.7803	0.2272	1.5909	0.2272	3
489	78	Głosek-Sobieraj, Małgorzata	2018	101007/s10343-017-0407-18	potato	Root/tuber crops	Cfb	Warm temperate	Fully humid	Tomaszkowo	Poland	20.4063	53.7175	3	0.071		85.6	Optimal	104.2	Medium			4.93495	Strongly acid		Kelpak	SWE	1	Foliar	1	0	continuous	1.7803	0.2272	1.7045	0.3032	3
490	79	Anthi, K.	2013		maize	Cereals	BSh	Arid	Steppe	Varamin	Iran	51.6472	35.3252	3	0.079		25.9		368	Optimal	7.62	Moderately saline	7.40395	Moderately alkaline	Clay loam		HFA	0	Foliar	0.33	1	1	1.17792	0.0500616	1.15703	0.0491738	0
491	79	Anthi, K.	2013		maize	Cereals	BSh	Arid	Steppe	Varamin	Iran	51.6472	35.3252	3	0.079		25.9		368	Optimal	7.62	Moderately saline	7.40395	Moderately alkaline	Clay loam		HFA	0	Foliar	0.67	1	1	1.17792	0.0500616	1.20119	0.0510506	0
492	79	Anthi, K.	2013		maize	Cereals	BSh	Arid	Steppe	Varamin	Iran	51.6472	35.3252	3	0.079		25.9		368	Optimal	7.62	Moderately saline	7.40395	Moderately alkaline	Clay loam		HFA	0	Foliar	1	1	1	1.17792	0.0500616	1.21604	0.0516817	0
493	80	Szczepanek M	2017	101080/0906471020171278784	carrot	Vegetables	Cfb	Warm temperate	Fully humid	Bydgoszcz	Poland	18.0084	53.1235	4	0.069		190	Optimal	95	Medium			6.73804	Neutral	Sandy loam	Kelpak	SWE	1	Foliar	1	1	1	7.234	0.699528	8.199	0.792843	0
494	80	Szczepanek M	2017	101080/0906471020171278786	carrot	Vegetables	Cfb	Warm temperate	Fully humid	Bydgoszcz	Poland	18.0084	53.1235	4	0.069		190	Optimal	95	Medium			6.73804	Neutral	Sandy loam	Kelpak	SWE	1	Foliar	0.67	1	1	7.234	0.699528	8.08	0.781336	0
495	80	Szczepanek M	2017	101080/0906471020171278788	carrot	Vegetables	Cfb	Warm temperate	Fully humid	Bydgoszcz	Poland	18.0084	53.1235	4	0.069		190	Optimal	95	Medium			6.73804	Neutral	Sandy loam	Kelpak	SWE	1	Foliar	1	1	2	7.234	0.699528	7.474	0.722736	0
496	80	Szczepanek M	2017	101080/0906471020171278790	carrot	Vegetables	Cfb	Warm temperate	Fully humid	Bydgoszcz	Poland	18.0084	53.1235	4	0.069		190	Optimal	95	Medium			6.73804	Neutral	Sandy loam	Kelpak	SWE	1	Foliar	0.8	1	2	7.234	0.699528	7.375	0.713162	0
497	80	Szczepanek M	2017	101080/0906471020171278792	carrot	Vegetables	Cfb	Warm temperate	Fully humid	Bydgoszcz	Poland	18.0084	53.1235	4	0.069		190	Optimal	95	Medium			6.73804	Neutral	Sandy loam	Kelpak	SWE	1	Foliar	1	1	2	7.234	0.699528	7.959	0.769635	0
498	80	Szczepanek M	2017	101080/0906471020171278794	carrot	Vegetables	Cfb	Warm temperate	Fully humid	Bydgoszcz	Poland	18.0084	53.1235	4	0.069		190	Optimal	95	Medium			6.73804	Neutral	Sandy loam	Kelpak	SWE	1	Foliar	0.8	1	2	7.234	0.699528	7.914	0.765284	0
499	80	Szczepanek M	2017	101080/0906471020171278796	carrot	Vegetables	Cfb	Warm temperate	Fully humid	Bydgoszcz	Poland	18.0084	53.1235	4	0.069		190	Optimal	95	Medium			6.73804	Neutral	Sandy loam	Kelpak	SWE	1	Foliar	1	1	3	7.234	0.699528	7.641	0.738885	0
500	80	Szczepanek M	2017	101080/0906471020171278798	carrot	Vegetables	Cfb	Warm temperate	Fully humid	Bydgoszcz	Poland	18.0084	53.1235	4	0.069		190	Optimal	95	Medium			6.73804	Neutral	Sandy loam	Kelpak	SWE	1	Foliar	0.86	1	3	7.234	0.699528	7.943	0.768088	0
501	81	Khan S	2017	101007/s11356-017-0336-1	wheat	Cereals	BSh	Arid	Steppe	Faisalabad	Pakistan	73.135	31.4504	3											Loam	MLE	PE	0	Foliar	1	0	2	0.3467	0.0253	0.4743	0.014	0
502	81	Khan S	2017	101007/s11356-017-0336-3	wheat	Cereals	BSh	Arid	Steppe	Faisalabad	Pakistan	73.135	31.4504	3											Loam	MLE	PE	0	Foliar	1	0	2	0.3467	0.0253	0.4268	0.0163	0
503	81	Khan S	2017	101007/s11356-017-0336-5	wheat	Cereals	BSh	Arid	Steppe	Faisalabad	Pakistan	73.135	31.4504	3											Loam	MLE	PE	0	Foliar	1	0	2	0.3467	0.0253	0.4018	0.0186	0
504	81	Khan S	2017	101007/s11356-017-0336-7	wheat	Cereals	BSh	Arid	Steppe	Faisalabad	Pakistan	73.135	31.4504	3											Loam	MLE	PE	0	Foliar	1	0	2	0.3467	0.0253	0.3708	0.0174	0
505	81	Khan S	2017	101007/s11356-017-0336-9	wheat	Cereals	BSh	Arid	Steppe	Faisalabad	Pakistan	73.135	31.4504	3											Loam	MLE	PE	0	Foliar	1	0	2	0.3085	0.0235	0.409	0.0132	0
506	81	Khan S	2017	101007/s11356-017-0336-11	wheat	Cereals	BSh	Arid	Steppe	Faisalabad	Pakistan	73.135	31.4504	3											Loam	MLE	PE	0	Foliar	1	0	2	0.3085	0.0235	0.3761	0.019	0
507	81	Khan S	2017	101007/s11356-017-0336-13	wheat	Cereals	BSh	Arid	Steppe	Faisalabad	Pakistan	73.135	31.4504	3											Loam	MLE	PE	0	Foliar	1	0	2	0.3085	0.0235	0.3404	0.0366	0
508	81	Khan S	2017	101007/s11356-017-0336-15	wheat	Cereals	BSh	Arid	Steppe	Faisalabad	Pakistan	73.135	31.4504	3											Loam	MLE	PE	0	Foliar	1	0	2	0.3085	0.0235	0.3281	0.0176	0
509	82	Michalak I	2016	103389/fpls201601592	wheat	Cereals	Cfb	Warm temperate	Fully humid	lower silesia	Poland	16.8842	51.134	4									6.39996	Slightly acid	Loam		SWE	0	Foliar	1	0	2	0.945	0.034	0.948	0.04	0
510	82	Michalak I	2016	103389/fpls201601594	wheat	Cereals	Cfb	Warm temperate	Fully humid	lower silesia	Poland	16.8842	51.134	4									6.39996	Slightly acid	Loam		SWE	0	Foliar	1	0	2	0.945	0.034	0.943	0.025	0
511	82	Michalak I	2016	103389/fpls201601596	wheat	Cereals	Cfb	Warm temperate	Fully humid	lower silesia	Poland	16.8842	51.134	4									6.39996	Slightly acid	Loam		SWE	0	Foliar	1	0	2	0.945	0.034	0.9499	0.024	0
512	82	Michalak I	2016	103389/fpls201601598	wheat	Cereals	Cfb	Warm temperate	Fully humid	lower silesia	Poland	16.8842	51.134	4									6.39996	Slightly acid	Loam		SWE	0	Foliar	1	0	2	0.945	0.034	0.96	0.036	0
513	82	Michalak I	2016	103389/fpls201601600	wheat	Cereals	Cfb	Warm temperate	Fully humid	lower silesia	Poland	16.8842	51.134	4									6.39996	Slightly acid	Loam		SWE	0	Foliar	1	0	2	0.945	0.034	0.955	0.022	0
514	83	Godlewska A	2016	101080/0038076820161185742	grass mixure	Others	Dfb	Boreal	Fully humid	Siedlce	Poland	22.2902	52.1676	3	0.18		83	Optimal	157.7	Optimal			8.35673	Moderately alkaline		Kelpak	SWE	1	Foliar	1	0	3	1.33	0.117572	1.42	0.125528	1
515	83	Godlewska A	2016	101080/0038076820161185744	grass mixure	Others	Dfb	Boreal	Fully humid	Siedlce	Poland	22.2902	52.1676	3	0.18		83	Optimal	157.7	Optimal			8.35673	Moderately alkaline		Kelpak	SWE	1	Foliar	1	0	3	1.06	0.093704	1.17	0.103428	2
516	83	Godlewska A	2016	101080/0038076820161185746	grass mixure	Others	Dfb	Boreal	Fully humid	Siedlce	Poland	22.2902	52.1676	3	0.18		83	Optimal	157.7	Optimal			8.35673	Moderately alkaline		Kelpak	SWE	1	Foliar	1	0	3	0.83	0.073372	0.89	0.078676	3
517	84	andon S	2016	101080/0010362420151011750	soybean	Legumes	Cwa	Warm temperate	Winter dry	Pantgar	India	79.4908	29.0222	3									7.70106	Moderately alkaline	Silty clay loam	Biozyme granule	SWE	1	Soil	0.56	1	1	0.2477	0.0331918	0.282	0.037788	1
518	84	andon S	2016	101080/0010362420151011752	soybean	Legumes	Cwa	Warm temperate	Winter dry	Pantgar	India	79.4908	29.0222	3									7.70106	Moderately alkaline	Silty clay loam	Biozyme granule	SWE	1	Soil	0.78	1	1	0.2477	0.0331918	0.2915	0.039061	1
519	84	andon S	2016	101080/0010362420151011754	soybean	Legumes	Cwa	Warm temperate	Winter dry	Pantgar	India	79.4908	29.0222	3									7.70106	Moderately alkaline	Silty clay loam	Biozyme granule	SWE	1	Soil	1	1	1	0.2477	0.0331918	0.2955	0.039597	1
520	84	andon S	2016	101080/0010362420151011756	soybean	Legumes	Cwa	Warm temperate	Winter dry	Pantgar	India	79.4908	29.0222	3									7.70106	Moderately alkaline	Silty clay loam	Biozyme crop+	SWE	1	Foliar	0.5	1	1	0.2477	0.0331918	0.2868	0.0384312	1
521	84	andon S	2016	101080/0010362420151011758	soybean	Legumes	Cwa	Warm temperate	Winter dry	Pantgar	India	79.4908	29.0222	3									7.70106	Moderately alkaline	Silty clay loam	Biozyme crop+	SWE	1	Foliar	1	1	1	0.2477	0.0331918	0.3009	0.0403206	1
522	84	andon S	2016	101080/0010362420151011760	soybean	Legumes	Cwa	Warm temperate	Winter dry	Pantgar	India	79.4908	29.0222	3									7.70106	Moderately alkaline	Silty clay loam	Biozyme granule	SWE	1	Foliar	0.56	1	1	0.2041	0.0273494	0.3344	0.0448096	2
523	84	andon S	2016	101080/0010362420151011762	soybean	Legumes	Cwa	Warm temperate	Winter dry	Pantgar	India	79.4908	29.0222	3									7.70106	Moderately alkaline	Silty clay loam	Biozyme granule	SWE	1	Foliar	0.78	1	1	0.2041	0.0273494	0.341	0.045694	2
524	84	andon S	2016	101080/0010362420151011764	soybean	Legumes	Cwa	Warm temperate	Winter dry	Pantgar	India	79.4908	29.0222	3									7.70106	Moderately alkaline	Silty clay loam	Biozyme granule	SWE	1	Foliar	1	1	1	0.2041	0.0273494	0.3459	0.0463506	2
525	84	andon S	2016	101080/0010362420151011766	soybean	Legumes	Cwa	Warm temperate	Winter dry	Pantgar	India	79.4908	29.0222	3									7.70106	Moderately alkaline	Silty clay loam	Biozyme crop+	SWE	1	Foliar	0.5	1	1	0.2041	0.0273494	0.3492	0.0467928	2
526	84	andon S	2016	101080/0010362420151011768	soybean	Legumes	Cwa	Warm temperate	Winter dry	Pantgar	India	79.4908	29.0222	3									7.70106	Moderately alkaline	Silty clay loam	Biozyme crop+	SWE	1	Foliar	1	1	1	0.2041	0.0273494	0.3445	0.046163	2
527	85	Procházka, P.	2015	1017221/225/2015-PSE	soybean	Legumes	Cfb	Warm temperate	Fully humid	Studeneves	Czech Republic	14.0444	50.2241	3												Lexin	HFA	1	Seed	1	0	1	0.251	0.033634	0.271	0.036314	1
528	85	Procházka, P.	2015	1017221/225/2015-PSE	soybean	Legumes	Cfb	Warm temperate	Fully humid	Studeneves	Czech Republic	14.0444	50.2241	3												Lignohumate B	HFA	1	Seed	1	0	1	0.251	0.033634	0.29	0.03886	1
529	85	Procházka, P.	2015	1017221/225/2015-PSE	soybean	Legumes	Cfb	Warm temperate	Fully humid	Studeneves	Czech Republic	14.0444	50.2241	3												Lexin	HFA	1	Seed	1	0	1	0.334	0.044756	0.332	0.044488	2
530	85	Procházka, P.	2015	1017221/225/2015-PSE	soybean	Legumes	Cfb	Warm temperate	Fully humid	Studeneves	Czech Republic	14.0444	50.2241	3												Lignohumate B	HFA	1	Seed	1	0	1	0.334	0.044756	0.375	0.05025	2
531	85	Procházka, P.	2015	1017221/225/2015-PSE	soybean	Legumes	Cfb	Warm temperate	Fully humid	Studeneves	Czech Republic	14.0444	50.2241	3												Lexin	HFA	1	Seed	1	0	1	0.271	0.036314	0.267	0.035778	3
532	85	Procházka, P.	2015	1017221/225/2015-PSE	soybean	Legumes	Cfb	Warm temperate	Fully humid	Studeneves	Czech Republic	14.0444	50.2241	3												Lignohumate B	HFA	1	Seed	1	0	1	0.271	0.036314	0.29	0.03886	3
533	86	Layek J	2015	101080/0020723320151010856	maize	Cereals	Cwa	Warm temperate	Winter dry	Umiam	India	91.927	25.6768	3									5.20131	Moderately acid		Kappaphycus alvarezii	SWE	0	Foliar	0.17	1	3	0.496	0.02108	0.518	0.022015	0
534	86	Layek J	2015	101080/0020723320151010858	maize	Cereals	Cwa	Warm temperate	Winter dry	Umiam	India	91.927	25.6768	3									5.20131	Moderately acid		Kappaphycus alvarezii	SWE	0	Foliar	0.33	1	3	0.496	0.02108	0.527	0.0223975	0
535	86	Layek J	2015	101080/0020723320151010860	maize	Cereals	Cwa	Warm temperate	Winter dry	Umiam	India	91.927	25.6768	3									5.20131	Moderately acid		Kappaphycus alvarezii	SWE	0	Foliar	0.67	1	3	0.496	0.02108	0.552	0.02346	0
536	86	Layek J	2015	101080/0020723320151010862	maize	Cereals	Cwa	Warm temperate	Winter dry	Umiam	India	91.927	25.6768	3									5.20131	Moderately acid		Kappaphycus alvarezii	SWE	0	Foliar	1	1	3	0.496	0.02108	0.561	0.0238425	0
537	86	Layek J	2015	101080/0020723320151010864	maize	Cereals	Cwa	Warm temperate	Winter dry	Umiam	India	91.927	25.6768	3									5.20131	Moderately acid		Gracilaria edulis	SWE	0	Foliar	0.17	1	3	0.496	0.02108	0.502	0.021335	0
538	86	Layek J	2015	101080/0020723320151010866	maize	Cereals	Cwa	Warm temperate	Winter dry	Umiam	India	91.927	25.6768	3									5.20131	Moderately acid		Gracilaria edulis	SWE	0	Foliar	0.33	1	3	0.496	0.02108	0.511	0.0217175	0
539	86	Layek J	2015	101080/0020723320151010868	maize	Cereals	Cwa	Warm temperate	Winter dry	Umiam	India	91.927	25.6768	3									5.20131	Moderately acid		Gracilaria edulis	SWE	0	Foliar	0.67	1	3	0.496	0.02108	0.537	0.0228225	0
540	86	Layek J	2015	101080/0020723320151010870	maize	Cereals	Cwa	Warm temperate	Winter dry	Umiam	India	91.927	25.6768	3									5.20131	Moderately acid		Gracilaria edulis	SWE	0	Foliar	1	1	3	0.496	0.02108	0.548	0.02329	0
541	87	Kostadinova S	2015		wheat	Cereals	Cfb	Warm temperate	Fully humid	Pazardzik	Bulgaria	24.3336	42.1928	4	0.8		128	Optimal	180	Optimal			5.70331	Moderately acid		Amalgerol	SWE	1	Foliar	1	0	1	0.414	0.017595	0.482	0.020485	1
542	87	Kostadinova S	2015		wheat	Cereals	Cfb	Warm temperate	Fully humid	Pazardzik	Bulgaria	24.3336	42.1928	4	0.8		128	Optimal	180	Optimal			5.70331	Moderately acid		Amalgerol	SWE	1	Foliar	1	0	1	0.4651	0.0197668	0.4852	0.020621	2
543	87	Kostadinova S	2015		wheat	Cereals	Cfb	Warm temperate	Fully humid	Pazardzik	Bulgaria	24.3336	42.1928	4	0.8		128	Optimal	180	Optimal			5.70331	Moderately acid		Amalgerol	SWE	1	Foliar	1	0	1	0.38	0.01615	0.4191	0.0178118	3
544	88	Hammad S A R	2014	101016/jaoas201406019	wheat	Cereals	BWh	Arid	Desert	Shebin El-Kom	Egypt	31.0106	30.5503	4		30.2	8.4	Very low	285.2	Optimal	0.8856	Nonsaline	7.60885	Moderately alkaline	Clay loam	Delfan	PHs	1	Foliar	0.5	1	3	0.604762	0.0257024	0.652381	0.0277262	1
545	88	Hammad S A R	2014	101016/jaoas201406021	wheat	Cereals	BWh	Arid	Desert	Shebin El-Kom	Egypt	31.0106	30.5503	4		30.2	8.4	Very low	285.2	Optimal	0.8856	Nonsaline	7.60885	Moderately alkaline	Clay loam	Delfan	PHs	1	Foliar	1	1	3	0.604762	0.0257024	0.709524	0.0301548	1
546	88	Hammad S A R	2014	101016/jaoas201406023	wheat	Cereals	BWh	Arid	Desert	Shebin El-Kom	Egypt	31.0106	30.5503	4		30.2	8.4	Very low	285.2	Optimal	0.8856	Nonsaline	7.60885	Moderately alkaline	Clay loam	yeast	PHs	0	Foliar	0.5	1	3	0.604762	0.0257024	0.735714	0.0312679	1
547	88	Hammad S A R	2014	101016/jaoas201406025	wheat	Cereals	BWh	Arid	Desert	Shebin El-Kom	Egypt	31.0106	30.5503	4		30.2	8.4	Very low	285.2	Optimal	0.8856	Nonsaline	7.60885	Moderately alkaline	Clay loam	yeast	PHs	0	Foliar	1	1	3	0.604762	0.0257024	0.816667	0.0347083	1
548	88	Hammad S A R	2014	101016/jaoas201406027	wheat	Cereals	BWh	Arid	Desert	Shebin El-Kom	Egypt	31.0106	30.5503	4		31.5	8.6	Very low	290.1	Optimal	0.9222	Nonsaline	7.70106	Moderately alkaline	Clay loam	Delfan	PHs	1	Foliar	0.5	1	3	0.638095	0.027119	0.711905	0.030256	2
549	88	Hammad S A R	2014	101016/jaoas201406029	wheat	Cereals	BWh	Arid	Desert	Shebin El-Kom	Egypt	31.0106	30.5503	4		31.5	8.6	Very low	290.1	Optimal	0.9222	Nonsaline	7.70106	Moderately alkaline	Clay loam	Delfan	PHs	1	Foliar	1	1	3	0.638095	0.027119	0.759524	0.0322798	2
550	88	Hammad S A R	2014	101016/jaoas201406031	wheat	Cereals	BWh	Arid	Desert	Shebin El-Kom	Egypt	31.0106	30.5503	4		31.5	8.6	Very low	290.1	Optimal	0.9222	Nonsaline	7.70106	Moderately alkaline	Clay loam	yeast	PHs	0	Foliar	0.5	1	3	0.638095	0.027119	0.780952	0.0331905	2
551	88	Hammad S A R	2014	101016/jaoas201406033	wheat	Cereals	BWh	Arid	Desert	Shebin El-Kom	Egypt	31.0106	30.5503	4		31.5	8.6	Very low	290.1	Optimal	0.9222	Nonsaline	7.70106	Moderately alkaline	Clay loam	yeast	PHs	0	Foliar	1	1	3	0.638095	0.027119	0.816667	0.0347083	2
552	89	Arif, M.	2019	10.3390/su11072171	cotton	Others	BWh	Arid	Desert	Multan	Pakistan	71.5249	30.1575	3	0.053		7.05	Very low	148	Optimal	2.13	Slightly saline	8.06987	Moderately alkaline	Silt loam	MLE	PE	0	Foliar	1	0	2	0.296071	0.0261727	0.320284	0.0283131	1
553	89	Arif, M.	2019	10.3390/su11072172	cotton	Others	BWh	Arid	Desert	Multan	Pakistan	71.5249	30.1575	3	0.032		6.23	Very low	180	Optimal	1.9836	Nonsaline	8.2	Moderately alkaline	Silt loam	MLE	PE	0	Foliar	1	0	2	0.32625	0.0288405	0.359209	0.0317541	2
554	90	Kandil Ahamed A	2013		onion	Vegetables	BWh	Arid	Desert	Giza	Egypt	31.2089	30.0131	4		40.12	3.36	Very low	299.1	Optimal			7.87	Moderately alkaline	Clay	Amino-Power	PHs	1	Foliar	1	0	2	2.846	0.275208	2.982	0.288359	1
555	90	Kandil Ahamed A	2013		onion	Vegetables	BWh	Arid	Desert	Giza	Egypt	31.2089	30.0131	4		40.12	3.36	Very low	299.1	Optimal			7.87	Moderately alkaline	Clay	Uni Humic	HFA	1	Foliar	1	0	2	2.846	0.275208	2.992	0.289326	1
556	90	Kandil Ahamed A	2013		onion	Vegetables	BWh	Arid	Desert	Giza	Egypt	31.2089	30.0131	4		40.12	3.36	Very low	299.1	Optimal			7.87	Moderately alkaline	Clay	Amino-Power	PHs	1	Foliar	1	0	2	2.608	0.252194	2.658	0.257029	2
557	90	Kandil Ahamed A	2013		onion	Vegetables	BWh	Arid	Desert	Giza	Egypt	31.2089	30.0131	4		40.12	3.36	Very low	299.1	Optimal			7.87	Moderately alkaline	Clay	Uni Humic	HFA	1	Foliar	1	0	2	2.608	0.252194	2.723	0.263314	2
558	91	Ciepiela G A	2013		grass mixure	Others	Dfb	Boreal	Fully humid	Siedlce	Poland	22.2902	52.1676	3	0.18		393.3	Optimal	15.8	Very low			8.35673	Moderately alkaline		Kelpak	SWE	1	Foliar	1	0	3	0.43	0.038012	0.48	0.042432	1
559	91	Ciepiela G A	2013		grass mixure	Others	Dfb	Boreal	Fully humid	Siedlce	Poland	22.2902	52.1676	3	0.18		393.3	Optimal	15.8	Very low			8.35673	Moderately alkaline		Kelpak	SWE	1	Foliar	1	0	3	0.34	0.030056	0.38	0.033592	2
560	91	Ciepiela G A	2013		grass mixure	Others	Dfb	Boreal	Fully humid	Siedlce	Poland	22.2902	52.1676	3	0.18		393.3	Optimal	15.8	Very low			8.35673	Moderately alkaline		Kelpak	SWE	1	Foliar	1	0	3	0.27	0.023868	0.29	0.025636	3
561	92	Befrozfar Mohammad Reza	2013		basil	Others	Csa	Warm temperate	Summer dry	mahdasht	Iran	50.7936	35.7309	4	0.17		7.68	Very low	240	Optimal	10.7676	Strongly saline	7.81375	Moderately alkaline	Clay loam		HFA	0	Soil	1	0	1	0.795	0.070278	0.8381	0.074088	0
562	92	Befrozfar Mohammad Reza	2013		basil	Others	Csa	Warm temperate	Summer dry	mahdasht	Iran	50.7936	35.7309	4	0.17		7.68	Very low	240	Optimal	10.7676	Strongly saline	7.81375	Moderately alkaline	Clay loam		HFA	0	Foliar	1	0	1	0.795	0.070278	0.8025	0.070941	0
563	93	Szot Iwo	2013		honeysuckle	Others	Dfb	Boreal	Fully humid	Lublin	Poland	22.5684	51.2465	3											Clay loam	Goëmar BM 86	SWE	1	Foliar	1	0	3	0.414	0.0365976	0.4298	0.0379943	0
564	93	Szot Iwo	2013		honeysuckle	Others	Dfb	Boreal	Fully humid	Lublin	Poland	22.5684	51.2465	3											Clay loam	Goëmar BM 86	SWE	1	Foliar	1	0	3	1.1678	0.103234	1.0523	0.0930233	0
565	94	Selim, El‐Metwally	2013	10.1002/jpln.201100063	broccoli	Vegetables	BWh	Arid	Desert	Giza	Egypt	31.2089	30.0131	3		27	5.5	Very low	96	Medium	0.23	Nonsaline	8.2	Moderately alkaline	Sand		HFA	0	Soil	1	0	1	0.124	0.013888	0.1449	0.0162288	0
566	95	Haider Muhammad Wasim	2012		potato	Root/tuber crops	BSh	Arid	Steppe	Faisalabad	Pakistan	73.135	31.4504	3												Primo	SWE	1	Foliar	1	0	1	1.939	0.137	2.401	0.241	0
567	95	Haider Muhammad Wasim	2012		potato	Root/tuber crops	BSh	Arid	Steppe	Faisalabad	Pakistan	73.135	31.4504	4												Primo	SWE	1	Foliar	1	0	1	1.939	0.137	2.401	0.279	0
568	95	Haider Muhammad Wasim	2012		potato	Root/tuber crops	BSh	Arid	Steppe	Faisalabad	Pakistan	73.135	31.4504	4												Primo	SWE	1	Foliar	1	0	1	1.939	0.137	2.297	0.41	0
569	95	Haider Muhammad Wasim	2012		potato	Root/tuber crops	BSh	Arid	Steppe	Faisalabad	Pakistan	73.135	31.4504	4												Primo	SWE	1	Foliar	1	0	2	1.939	0.137	2.18	0.182	0
570	95	Haider Muhammad Wasim	2012		potato	Root/tuber crops	BSh	Arid	Steppe	Faisalabad	Pakistan	73.135	31.4504	4												Primo	SWE	1	Foliar	1	0	2	1.939	0.137	2.434	0.332	0
571	95	Haider Muhammad Wasim	2012		potato	Root/tuber crops	BSh	Arid	Steppe	Faisalabad	Pakistan	73.135	31.4504	4												Primo	SWE	1	Foliar	1	0	2	1.939	0.137	2.03	0.091	0
572	95	Haider Muhammad Wasim	2012		potato	Root/tuber crops	BSh	Arid	Steppe	Faisalabad	Pakistan	73.135	31.4504	4												Primo	SWE	1	Foliar	1	0	3	1.939	0.137	2.121	0.248	0
573	96	Grabowska A	2012	102478/v10032-012-0014-2	carrot	Vegetables	Cfb	Warm temperate	Fully humid	Krakow	Poland	19.945	50.0647	3		44	47.5	Optimal	191	Optimal			6.19506	Slightly acid		Aminoplant	PHs	1	Foliar	0.5	1	2	1.55	0.149885	1.72	0.166324	1
574	96	Grabowska A	2012	102478/v10032-012-0014-4	carrot	Vegetables	Cfb	Warm temperate	Fully humid	Krakow	Poland	19.945	50.0647	3		44	47.5	Optimal	191	Optimal			6.19506	Slightly acid		Aminoplant	PHs	1	Foliar	1	1	2	1.55	0.149885	1.53	0.147951	1
575	96	Grabowska A	2012	102478/v10032-012-0014-6	carrot	Vegetables	Cfb	Warm temperate	Fully humid	Krakow	Poland	19.945	50.0647	3		115.4	48	Optimal	217	Optimal			6.19506	Slightly acid		Aminoplant	PHs	1	Foliar	0.5	1	2	3.05	0.294935	2.97	0.287199	2
576	96	Grabowska A	2012	102478/v10032-012-0014-8	carrot	Vegetables	Cfb	Warm temperate	Fully humid	Krakow	Poland	19.945	50.0647	3		115.4	48	Optimal	217	Optimal			6.19506	Slightly acid		Aminoplant	PHs	1	Foliar	1	1	2	3.05	0.294935	3.13	0.302671	2
577	96	Grabowska A	2012	102478/v10032-012-0014-10	carrot	Vegetables	Cfb	Warm temperate	Fully humid	Krakow	Poland	19.945	50.0647	3		47.2	88	Optimal	142	Optimal			6.19506	Slightly acid		Aminoplant	PHs	1	Foliar	0.5	1	2	4.22	0.408074	5.02	0.485434	3
578	96	Grabowska A	2012	102478/v10032-012-0014-12	carrot	Vegetables	Cfb	Warm temperate	Fully humid	Krakow	Poland	19.945	50.0647	3		47.2	88	Optimal	142	Optimal			6.19506	Slightly acid		Aminoplant	PHs	1	Foliar	1	0	2	4.22	0.408074	5.07	0.490269	3
579	97	Gajc-Wolska Jani	2012		Endive	Vegetables	Cfb	Warm temperate	Fully humid	Warsaw	Poland	21.0122	52.2297	3												Aminoplant	PHs	1	Foliar	1	0	2	7.41	0.716547	9.21	0.890607	0
580	97	Gajc-Wolska Jani	2012		Endive	Vegetables	Cfb	Warm temperate	Fully humid	Warsaw	Poland	21.0122	52.2297	3												Aminoplant	PHs	1	Foliar	1	0	2	7.5	0.72525	7.71	0.745557	0
581	97	Gajc-Wolska Jani	2012		Endive	Vegetables	Cfb	Warm temperate	Fully humid	Warsaw	Poland	21.0122	52.2297	3												Aminoplant	PHs	1	Foliar	1	0	2	4.92	0.475764	4.48	0.433216	0
582	97	Gajc-Wolska Jani	2012		Endive	Vegetables	Cfb	Warm temperate	Fully humid	Warsaw	Poland	21.0122	52.2297	3												Aminoplant	PHs	1	Foliar	1	0	2	3.39	0.327813	3.66	0.353922	0
583	97	Gajc-Wolska Jani	2012		Endive	Vegetables	Cfb	Warm temperate	Fully humid	Warsaw	Poland	21.0122	52.2297	3												Aminoplant	PHs	1	Foliar	1	0	2	3.7	0.35779	3.92	0.379064	0
584	97	Gajc-Wolska Jani	2012		Endive	Vegetables	Cfb	Warm temperate	Fully humid	Warsaw	Poland	21.0122	52.2297	3												Aminoplant	PHs	1	Foliar	1	0	2	3.28	0.317176	2.79	0.269793	0
585	98	Fawzy ZF	2012		garlic	Vegetables	BWh	Arid	Desert	Berkash Giza Governorate	Egypt	31.0444	30.1669	4											Sand	AminoGreen	PHs	1	Foliar	0.33	1	4	1.12619	0.108903	1.24762	0.120645	1
586	98	Fawzy ZF	2012		garlic	Vegetables	BWh	Arid	Desert	Berkash Giza Governorate	Egypt	31.0444	30.1669	4											Sand	AminoGreen	PHs	1	Foliar	0.67	1	4	1.12619	0.108903	1.25714	0.121566	1
587	98	Fawzy ZF	2012		garlic	Vegetables	BWh	Arid	Desert	Berkash Giza Governorate	Egypt	31.0444	30.1669	4											Sand	AminoGreen	PHs	1	Foliar	1	1	4	1.12619	0.108903	1.29286	0.125019	1
588	98	Fawzy ZF	2012		garlic	Vegetables	BWh	Arid	Desert	Berkash Giza Governorate	Egypt	31.0444	30.1669	4											Sand		SWE	0	Foliar	0.33	1	4	1.12619	0.108903	1.25238	0.121105	1
589	98	Fawzy ZF	2012		garlic	Vegetables	BWh	Arid	Desert	Berkash Giza Governorate	Egypt	31.0444	30.1669	4											Sand		SWE	0	Foliar	0.67	1	4	1.12619	0.108903	1.27619	0.123408	1
590	98	Fawzy ZF	2012		garlic	Vegetables	BWh	Arid	Desert	Berkash Giza Governorate	Egypt	31.0444	30.1669	4											Sand		SWE	0	Foliar	1	1	4	1.12619	0.108903	1.3119	0.126861	1
591	98	Fawzy ZF	2012		garlic	Vegetables	BWh	Arid	Desert	Berkash Giza Governorate	Egypt	31.0444	30.1669	4											Sand	Chito-care	Chi	1	Foliar	0.33	1	4	1.12619	0.108903	1.24524	0.120415	1
592	98	Fawzy ZF	2012		garlic	Vegetables	BWh	Arid	Desert	Berkash Giza Governorate	Egypt	31.0444	30.1669	4											Sand	Chito-care	Chi	1	Foliar	0.67	1	4	1.12619	0.108903	1.27619	0.123408	1
593	98	Fawzy ZF	2012		garlic	Vegetables	BWh	Arid	Desert	Berkash Giza Governorate	Egypt	31.0444	30.1669	4											Sand	Chito-care	Chi	1	Foliar	1	1	4	1.12619	0.108903	1.26667	0.122487	1
594	98	Fawzy ZF	2012		garlic	Vegetables	BWh	Arid	Desert	Berkash Giza Governorate	Egypt	31.0444	30.1669	4											Sand	AminoGreen	PHs	1	Foliar	0.33	1	4	1.07857	0.104298	1.25952	0.121796	2
595	98	Fawzy ZF	2012		garlic	Vegetables	BWh	Arid	Desert	Berkash Giza Governorate	Egypt	31.0444	30.1669	4											Sand	AminoGreen	PHs	1	Foliar	0.67	1	4	1.07857	0.104298	1.27143	0.122947	2
596	98	Fawzy ZF	2012		garlic	Vegetables	BWh	Arid	Desert	Berkash Giza Governorate	Egypt	31.0444	30.1669	4											Sand	AminoGreen	PHs	1	Foliar	1	1	4	1.07857	0.104298	1.28095	0.123868	2
597	98	Fawzy ZF	2012		garlic	Vegetables	BWh	Arid	Desert	Berkash Giza Governorate	Egypt	31.0444	30.1669	4											Sand		SWE	0	Foliar	0.33	1	4	1.07857	0.104298	1.26667	0.122487	2
598	98	Fawzy ZF	2012		garlic	Vegetables	BWh	Arid	Desert	Berkash Giza Governorate	Egypt	31.0444	30.1669	4											Sand		SWE	0	Foliar	0.67	1	4	1.07857	0.104298	1.28333	0.124098	2
599	98	Fawzy ZF	2012		garlic	Vegetables	BWh	Arid	Desert	Berkash Giza Governorate	Egypt	31.0444	30.1669	4											Sand		SWE	0	Foliar	1	1	4	1.07857	0.104298	1.35238	0.130775	2
600	98	Fawzy ZF	2012		garlic	Vegetables	BWh	Arid	Desert	Berkash Giza Governorate	Egypt	31.0444	30.1669	4											Sand	Chito-care	Chi	1	Foliar	0.33	1	4	1.07857	0.104298	1.2619	0.122026	2
601	98	Fawzy ZF	2012		garlic	Vegetables	BWh	Arid	Desert	Berkash Giza Governorate	Egypt	31.0444	30.1669	4											Sand	Chito-care	Chi	1	Foliar	0.67	1	4	1.07857	0.104298	1.28095	0.123868	2
602	98	Fawzy ZF	2012		garlic	Vegetables	BWh	Arid	Desert	Berkash Giza Governorate	Egypt	31.0444	30.1669	4											Sand	Chito-care	Chi	1	Foliar	1	1	4	1.07857	0.104298	1.2881	0.124559	2
603	99	Dogra BS	2012		onion	Vegetables	Cwa	Warm temperate	Winter dry	BhotaHamirpur	India	76.5676	31.6098	3													SWE	0	Soil	0.43	1	1	2.66	0.257222	3.56	0.344252	0
604	99	Dogra BS	2012		onion	Vegetables	Cwa	Warm temperate	Winter dry	BhotaHamirpur	India	76.5676	31.6098	3													SWE	0	Soil	0.57	1	1	2.66	0.257222	3.83	0.370361	0
605	99	Dogra BS	2012		onion	Vegetables	Cwa	Warm temperate	Winter dry	BhotaHamirpur	India	76.5676	31.6098	3													SWE	0	Soil	0.71	1	1	2.66	0.257222	5.84	0.564728	0
606	99	Dogra BS	2012		onion	Vegetables	Cwa	Warm temperate	Winter dry	BhotaHamirpur	India	76.5676	31.6098	3													SWE	0	Soil	0.86	1	1	2.66	0.257222	5.27	0.509609	0
607	99	Dogra BS	2012		onion	Vegetables	Cwa	Warm temperate	Winter dry	BhotaHamirpur	India	76.5676	31.6098	3													SWE	0	Soil	1	1	1	2.66	0.257222	5	0.4835	0
608	100	Culver Mvumi	2012		rape	Others	Cwa	Warm temperate	Winter dry	Mutare	Zimbabwe	32.6691	-18.9758	3	0.12		18.5	Low					5.66233	Moderately acid		MLE	PE	0	Foliar	1	0	1	5.04	0.449568	6.77	0.603884	0
609	100	Culver Mvumi	2012		rape	Others	Cwa	Warm temperate	Winter dry	Mutare	Zimbabwe	32.6691	-18.9758	3	0.12		18.5	Low					5.66233	Moderately acid		MLE	PE	0	Foliar	1	0	2	5.04	0.449568	7.44	0.663648	0
610	100	Culver Mvumi	2012		rape	Others	Cwa	Warm temperate	Winter dry	Mutare	Zimbabwe	32.6691	-18.9758	3	0.12		18.5	Low					5.66233	Moderately acid		MLE	PE	0	Foliar	1	0	3	5.04	0.449568	8.75	0.7805	0
611	100	Culver Mvumi	2012		cabbage	Vegetables	Cwa	Warm temperate	Winter dry	Mutare	Zimbabwe	32.6691	-18.9758	3	0.12		18.5	Low					5.66233	Moderately acid		MLE	PE	0	Foliar	1	0	1	2.39	0.231113	3.32	0.321044	0
612	100	Culver Mvumi	2012		cabbage	Vegetables	Cwa	Warm temperate	Winter dry	Mutare	Zimbabwe	32.6691	-18.9758	3	0.12		18.5	Low					5.66233	Moderately acid		MLE	PE	0	Foliar	1	0	2	2.39	0.231113	4.82	0.466094	0
613	100	Culver Mvumi	2012		cabbage	Vegetables	Cwa	Warm temperate	Winter dry	Mutare	Zimbabwe	32.6691	-18.9758	3	0.12		18.5	Low					5.66233	Moderately acid		MLE	PE	0	Foliar	1	0	3	2.39	0.231113	5.79	0.559893	0
614	101	Bozorgi Hamid Reza	2012		Eggplant	Vegetables	Cfa	Warm temperate	Fully humid	Astaneh Ashrafiyeh	Iran	49.9437	37.2598	3	0.194		9.1	Very low	197	Optimal	1.32	Nonsaline	7.19906	Neutral	Clay loam		SWE	0	Foliar	0.5	1	2	2.055	0.198718	3.402	0.328973	0
615	101	Bozorgi Hamid Reza	2012		Eggplant	Vegetables	Cfa	Warm temperate	Fully humid	Astaneh Ashrafiyeh	Iran	49.9437	37.2598	3	0.194		9.1	Very low	197	Optimal	1.32	Nonsaline	7.19906	Neutral	Clay loam		SWE	0	Foliar	1	1	2	2.055	0.198718	3.789	0.366396	0
616	102	Azarpour Ebrahim	2012	05897/AJAR111834	eggplant	Vegetables	Cfa	Warm temperate	Fully humid	Astaneh Ashrafiyeh	Iran	49.9437	37.2598	3	0.194		9.1	Very low	197	Optimal	1.32	Nonsaline	7.19906	Neutral	Clay loam		HFA	0	Foliar	0.5	1	3	1.8031	0.17436	2.356	0.227825	0
617	102	Azarpour Ebrahim	2012	05897/AJAR111836	eggplant	Vegetables	Cfa	Warm temperate	Fully humid	Astaneh Ashrafiyeh	Iran	49.9437	37.2598	3	0.194		9.1	Very low	197	Optimal	1.32	Nonsaline	7.19906	Neutral	Clay loam		HFA	0	Foliar	1	1	3	1.8031	0.17436	2.779	0.268729	0
618	103	Wadas, Wanda	2020	10.3390/agriculture10070265	soybean	Legumes	Dfb	Boreal	Fully humid	Perespa	Poland	23.636	50.657	4		8	12.7	Very low	15.1	Very low			8.46942			wormwood leaf	PE	0	Foliar	1	0	2	0.335227	0.0189394	0.412879	0.0189394	1
619	103	Wadas, Wanda	2020	10.3390/agriculture10070266	soybean	Legumes	Dfb	Boreal	Fully humid	Perespa	Poland	23.636	50.657	4		8	12.7	Very low	15.1	Very low			8.46942			wormwood leaf	PE	0	Soil	1	0	2	0.335227	0.0189394	0.393939	0.0227273	1
620	103	Wadas, Wanda	2020	10.3390/agriculture10070267	soybean	Legumes	Dfb	Boreal	Fully humid	Perespa	Poland	23.636	50.657	4		8	12.7	Very low	15.1	Very low			8.46942			wormwood leaf	PE	0	Foliar	1	0	2	0.335227	0.0189394	0.424242	0.0151515	1
621	103	Wadas, Wanda	2020	10.3390/agriculture10070268	soybean	Legumes	Dfb	Boreal	Fully humid	Perespa	Poland	23.636	50.657	4		8	12.7	Very low	15.1	Very low			8.46942			wormwood leaf	PE	0	Soil	1	0	2	0.335227	0.0189394	0.395833	0.0378788	1
622	103	Wadas, Wanda	2020	10.3390/agriculture10070269	soybean	Legumes	Dfb	Boreal	Fully humid	Perespa	Poland	23.636	50.657	4		8	12.7	Very low	15.1	Very low			8.46942			wormwood leaf	PE	0	Foliar	1	0	2	0.344697	0.0189394	0.420455	0.0189394	2
623	103	Wadas, Wanda	2020	10.3390/agriculture10070270	soybean	Legumes	Dfb	Boreal	Fully humid	Perespa	Poland	23.636	50.657	4		8	12.7	Very low	15.1	Very low			8.46942			wormwood leaf	PE	0	Soil	1	0	2	0.344697	0.0189394	0.422348	0.0265152	2
624	103	Wadas, Wanda	2020	10.3390/agriculture10070271	soybean	Legumes	Dfb	Boreal	Fully humid	Perespa	Poland	23.636	50.657	4		8	12.7	Very low	15.1	Very low			8.46942			wormwood leaf	PE	0	Foliar	1	0	2	0.344697	0.0189394	0.458333	0.0189394	2
625	103	Wadas, Wanda	2020	10.3390/agriculture10070272	soybean	Legumes	Dfb	Boreal	Fully humid	Perespa	Poland	23.636	50.657	4		8	12.7	Very low	15.1	Very low			8.46942			wormwood leaf	PE	0	Soil	1	0	2	0.344697	0.0189394	0.452652	0.0378788	2
626	103	Wadas, Wanda	2020	10.3390/agriculture10070273	soybean	Legumes	Dfb	Boreal	Fully humid	Perespa	Poland	23.636	50.657	4		8	12.7	Very low	15.1	Very low			8.46942			wormwood leaf	PE	0	Foliar	1	0	2	0.320076	0.0113636	0.405303	0.030303	3
627	103	Wadas, Wanda	2020	10.3390/agriculture10070274	soybean	Legumes	Dfb	Boreal	Fully humid	Perespa	Poland	23.636	50.657	4		8	12.7	Very low	15.1	Very low			8.46942			wormwood leaf	PE	0	Soil	1	0	2	0.320076	0.0113636	0.395833	0.0227273	3
628	103	Wadas, Wanda	2020	10.3390/agriculture10070275	soybean	Legumes	Dfb	Boreal	Fully humid	Perespa	Poland	23.636	50.657	4		8	12.7	Very low	15.1	Very low			8.46942			wormwood leaf	PE	0	Foliar	1	0	2	0.320076	0.0113636	0.429924	0.0151515	3
629	103	Wadas, Wanda	2020	10.3390/agriculture10070276	soybean	Legumes	Dfb	Boreal	Fully humid	Perespa	Poland	23.636	50.657	4		8	12.7	Very low	15.1	Very low			8.46942			wormwood leaf	PE	0	Soil	1	0	2	0.320076	0.0113636	0.344697	0.113636	3
630	104	Hameed, A.	2018	10.1080/01904167.2018.1510508	mandarin	Fruits	BSh	Arid	Steppe	Faisalabad	Pakistan	73.135	31.4504	3		13.6	5.79	Very low	136	Optimal	2.679	Slightly saline	7.47567	Moderately alkaline	Clay loam		HFA	0	Soil	1	0	2	0.809444	0.133558	1.02528	0.169171	0
631	104	Hameed, A.	2018	10.1080/01904167.2018.1510510	mandarin	Fruits	BSh	Arid	Steppe	Faisalabad	Pakistan	73.135	31.4504	3		13.6	5.79	Very low	136	Optimal	2.679	Slightly saline	7.47567	Moderately alkaline	Clay loam		HFA	0	Soil	1	0	3	0.809444	0.133558	1.02056	0.168392	0
632	105	Saruhan Veysel	2011		vetch	Others	Csa	Warm temperate	Summer dry	Diyarbakir	Turkey	40.211	37.925	3													HFA	0	Seed	1	0	1	1.173	0.103693	1.263	0.111649	1
633	105	Saruhan Veysel	2011		vetch	Others	Csa	Warm temperate	Summer dry	Diyarbakir	Turkey	40.211	37.925	3													HFA	0	Soil	1	0	1	1.173	0.103693	1.463	0.129329	1
634	105	Saruhan Veysel	2011		vetch	Others	Csa	Warm temperate	Summer dry	Diyarbakir	Turkey	40.211	37.925	3													HFA	0	Foliar	1	0	3	1.173	0.103693	1.383	0.122257	1
635	105	Saruhan Veysel	2011		vetch	Others	Csa	Warm temperate	Summer dry	Diyarbakir	Turkey	40.211	37.925	3													HFA	0	Seed	1	0	1	1.213	0.107229	1.353	0.119605	2
636	105	Saruhan Veysel	2011		vetch	Others	Csa	Warm temperate	Summer dry	Diyarbakir	Turkey	40.211	37.925	3													HFA	0	Soil	1	0	1	1.213	0.107229	1.573	0.139053	2
637	105	Saruhan Veysel	2011		vetch	Others	Csa	Warm temperate	Summer dry	Diyarbakir	Turkey	40.211	37.925	3													HFA	0	Foliar	1	0	3	1.213	0.107229	1.485	0.131274	2
638	106	Hadi MRHS	2011		Chamomile	Others	Csa	Warm temperate	Summer dry	Alborz	Iran	51.389	35.6892	3	0.63		14.4	Very low	178.4	Optimal	1.33	Nonsaline	7.36298		Loam	Fosnutren	PHs	1	Foliar	1	0	1	0.180077	0.0159188	0.252848	0.0223518	0
639	106	Hadi MRHS	2011		Chamomile	Others	Csa	Warm temperate	Summer dry	Alborz	Iran	51.389	35.6892	3	0.63		14.4	Very low	178.4	Optimal	1.33	Nonsaline	7.36298		Loam	Fosnutren	PHs	1	Foliar	1	0	1	0.180077	0.0159188	0.231568	0.0204706	0
640	106	Hadi MRHS	2011		Chamomile	Others	Csa	Warm temperate	Summer dry	Alborz	Iran	51.389	35.6892	3	0.63		14.4	Very low	178.4	Optimal	1.33	Nonsaline	7.36298		Loam	Fosnutren	PHs	1	Foliar	1	0	2	0.180077	0.0159188	0.185809	0.0164255	0
641	107	Colavita G M	2011	1017660/ActaHortic201190973	pear	Fruits	BSk	Arid	Steppe	Cinco Saltos	Argentina	-68.0567	-38.8314	3												Goëmar BM 1	SWE	1	Foliar	1	0	3	4.11	0.67815	4.28	0.7062	1
642	107	Colavita G M	2011	1017660/ActaHortic201190975	pear	Fruits	BSk	Arid	Steppe	Cinco Saltos	Argentina	-68.0567	-38.8314	3												Goëmar BM 1	SWE	1	Foliar	1	0	3	4.11	0.67815	4.59	0.75735	1
643	107	Colavita G M	2011	1017660/ActaHortic201190977	pear	Fruits	BSk	Arid	Steppe	Cinco Saltos	Argentina	-68.0567	-38.8314	3												Goëmar BM 1	SWE	1	Foliar	1	0	3	3.88	0.6402	4.09	0.67485	2
644	107	Colavita G M	2011	1017660/ActaHortic201190979	pear	Fruits	BSk	Arid	Steppe	Cinco Saltos	Argentina	-68.0567	-38.8314	3												Goëmar BM 1	SWE	1	Foliar	1	0	3	3.88	0.6402	4.46	0.7359	2
645	108	Kunicki Edward	2010	10.2478/fhort-2013-0154	spich	Vegetables	Cfb	Warm temperate	Fully humid	Krakow	Poland	19.945	50.0647	4		73.5	59	Optimal	146.6	Optimal			7.17857	Neutral		Aminopalnt	PHs	1	Foliar	0.5	1	2	2.99	0.289133	2.97	0.287199	1
646	108	Kunicki Edward	2010	10.2478/fhort-2013-0156	spich	Vegetables	Cfb	Warm temperate	Fully humid	Krakow	Poland	19.945	50.0647	4		73.5	59	Optimal	146.6	Optimal			7.17857	Neutral		Aminopalnt	PHs	1	Foliar	1	1	2	2.99	0.289133	3.123	0.301994	1
647	108	Kunicki Edward	2010	10.2478/fhort-2013-0158	spich	Vegetables	Cfb	Warm temperate	Fully humid	Krakow	Poland	19.945	50.0647	4		43.7	42.5	Optimal	259.7	Optimal			7.17857	Neutral		Aminopalnt	PHs	1	Foliar	0.5	1	2	2.925	0.282847	3.04	0.293968	2
648	108	Kunicki Edward	2010	10.2478/fhort-2013-0160	spich	Vegetables	Cfb	Warm temperate	Fully humid	Krakow	Poland	19.945	50.0647	4		43.7	42.5	Optimal	259.7	Optimal			7.17857	Neutral		Aminopalnt	PHs	1	Foliar	1	1	2	2.925	0.282847	3.163	0.305862	2
649	109	El-Hefny Eslah M	2010		cowpea	Legumes	BWh	Arid	Desert	Ras Sudr	Egypt	32.7178	29.5933	3					109.262	Medium	8.8461	Strongly saline	7.70106	Moderately alkaline	Sandy loam		HFA	0	Soil	0.33	1	4	0.759524	0.101776	0.95	0.1273	1
650	109	El-Hefny Eslah M	2010		cowpea	Legumes	BWh	Arid	Desert	Ras Sudr	Egypt	32.7178	29.5933	3					109.262	Medium	8.8461	Strongly saline	7.70106	Moderately alkaline	Sandy loam		HFA	0	Soil	0.67	1	4	0.759524	0.101776	1.23571	0.165586	1
651	109	El-Hefny Eslah M	2010		cowpea	Legumes	BWh	Arid	Desert	Ras Sudr	Egypt	32.7178	29.5933	3					109.262	Medium	8.8461	Strongly saline	7.70106	Moderately alkaline	Sandy loam		HFA	0	Soil	1	1	4	0.759524	0.101776	1.57381	0.21089	1
652	109	El-Hefny Eslah M	2010		cowpea	Legumes	BWh	Arid	Desert	Ras Sudr	Egypt	32.7178	29.5933	3					109.262	Medium	8.8461	Strongly saline	7.70106	Moderately alkaline	Sandy loam		HFA	0	Soil	0.33	1	4	0.62619	0.0839095	0.733333	0.0982667	2
653	109	El-Hefny Eslah M	2010		cowpea	Legumes	BWh	Arid	Desert	Ras Sudr	Egypt	32.7178	29.5933	3					109.262	Medium	8.8461	Strongly saline	7.70106	Moderately alkaline	Sandy loam		HFA	0	Soil	0.67	1	4	0.62619	0.0839095	0.945238	0.126662	2
654	109	El-Hefny Eslah M	2010		cowpea	Legumes	BWh	Arid	Desert	Ras Sudr	Egypt	32.7178	29.5933	3					109.262	Medium	8.8461	Strongly saline	7.70106	Moderately alkaline	Sandy loam		HFA	0	Soil	1	1	4	0.62619	0.0839095	1.2119	0.162395	2
655	110	Abdel-Mawgoud AMR	2010		strawberry	Fruits	BWh	Arid	Desert	Qalyubia Governorate	Egypt	31.2168	30.3292	3											Clay loam	Chito-care	Chi	1	Foliar	0.25	1	3	2.9259	0.482774	3.3704	0.556116	1
656	110	Abdel-Mawgoud AMR	2010		strawberry	Fruits	BWh	Arid	Desert	Qalyubia Governorate	Egypt	31.2168	30.3292	3											Clay loam	Chito-care	Chi	1	Foliar	0.5	1	3	2.9259	0.482774	5.2963	0.873889	1
657	110	Abdel-Mawgoud AMR	2010		strawberry	Fruits	BWh	Arid	Desert	Qalyubia Governorate	Egypt	31.2168	30.3292	3											Clay loam	Chito-care	Chi	1	Foliar	0.75	1	3	2.9259	0.482774	4.0741	0.672227	1
658	110	Abdel-Mawgoud AMR	2010		strawberry	Fruits	BWh	Arid	Desert	Qalyubia Governorate	Egypt	31.2168	30.3292	3											Clay loam	Chito-care	Chi	1	Foliar	1	1	3	2.9259	0.482774	3.5556	0.586674	1
659	110	Abdel-Mawgoud AMR	2010		strawberry	Fruits	BWh	Arid	Desert	Qalyubia Governorate	Egypt	31.2168	30.3292	3											Clay loam	Chito-care	Chi	1	Foliar	1	0	3	4.8519	0.800563	5.5926	0.922779	2
660	110	Abdel-Mawgoud AMR	2010		strawberry	Fruits	BWh	Arid	Desert	Qalyubia Governorate	Egypt	31.2168	30.3292	3											Clay loam	Chito-care	Chi	1	Foliar	1	0	3	4.8519	0.800563	8.7778	1.44834	2
661	110	Abdel-Mawgoud AMR	2010		strawberry	Fruits	BWh	Arid	Desert	Qalyubia Governorate	Egypt	31.2168	30.3292	3											Clay loam	Chito-care	Chi	1	Foliar	1	0	3	4.8519	0.800563	6.8148	1.12444	2
662	110	Abdel-Mawgoud AMR	2010		strawberry	Fruits	BWh	Arid	Desert	Qalyubia Governorate	Egypt	31.2168	30.3292	3											Clay loam	Chito-care	Chi	1	Foliar	1	0	3	4.8519	0.800563	5.9259	0.977774	2
663	111	Hamze, M. R.	2018	10.1080/03650340.2018.1439580	pistachio nut	Fruits	BWk	Arid	Desert	Rafsanja	Iran	56.0027	30.3549	3	0.23		29	Medium	300	Optimal	4.9	Moderately saline	7.99816	Moderately alkaline	Sandy loam	lysine	PHs	0	Foliar	1	0	2	0.36987	4.156e-06	0.51117	8.52e-06	1
664	111	Hamze, M. R.	2018	10.1080/03650340.2018.1439580	pistachio nut	Fruits	BWk	Arid	Desert	Rafsanja	Iran	56.0027	30.3549	3	0.16		32	Medium	304	Optimal	5.4	Moderately saline	8.1006	Moderately alkaline	Sandy loam	lysine	PHs	0	Foliar	1	0	2	0.34078	3.324e-06	0.52571	6.649e-06	2
665	112	Spinelli Francesco	2009		apple	Fruits	Cfa	Warm temperate	Fully humid	Cadriano Po Valley	Italy	10.5	45	5												Actiwave	SWE	1	Foliar	1	0	3	3.94	0.6501	4.3	0.7095	0
666	112	Spinelli Francesco	2009		apple	Fruits	Cfa	Warm temperate	Fully humid	Cadriano Po Valley	Italy	10.5	45	5												Actiwave	SWE	1	Foliar	1	0	3	3.38	0.5577	6.48	1.0692	0
667	112	Spinelli Francesco	2009		apple	Fruits	Cfa	Warm temperate	Fully humid	Cadriano Po Valley	Italy	10.5	45	5												Actiwave	SWE	1	Foliar	1	0	3	1.43	0.23595	1.807	0.298155	0
668	112	Spinelli Francesco	2009		apple	Fruits	Cfa	Warm temperate	Fully humid	Cadriano Po Valley	Italy	10.5	45	5												Actiwave	SWE	1	Foliar	1	0	3	2.377	0.392205	2.956	0.48774	0
669	113	Rathore S. S.	2009	10.1016/j.sajb.2008.10.010	soybean	Legumes	Cwa	Warm temperate	Winter dry	Jharpani galand	India	93.8439	25.7558	3							1.909	Nonsaline	4.80176	Strongly acid	Clay loam		SWE	0	Foliar	0.17	1	2	0.1339	0.0179426	0.148	0.019832	0
670	113	Rathore S. S.	2009	10.1016/j.sajb.2008.10.012	soybean	Legumes	Cwa	Warm temperate	Winter dry	Jharpani galand	India	93.8439	25.7558	3							1.909	Nonsaline	4.80176	Strongly acid	Clay loam		SWE	0	Foliar	0.33	1	2	0.1339	0.0179426	0.1492	0.0199928	0
671	113	Rathore S. S.	2009	10.1016/j.sajb.2008.10.014	soybean	Legumes	Cwa	Warm temperate	Winter dry	Jharpani galand	India	93.8439	25.7558	3							1.909	Nonsaline	4.80176	Strongly acid	Clay loam		SWE	0	Foliar	0.5	1	2	0.1339	0.0179426	0.1635	0.021909	0
672	113	Rathore S. S.	2009	10.1016/j.sajb.2008.10.016	soybean	Legumes	Cwa	Warm temperate	Winter dry	Jharpani galand	India	93.8439	25.7558	3							1.909	Nonsaline	4.80176	Strongly acid	Clay loam		SWE	0	Foliar	0.67	1	2	0.1339	0.0179426	0.1718	0.0230212	0
673	113	Rathore S. S.	2009	10.1016/j.sajb.2008.10.018	soybean	Legumes	Cwa	Warm temperate	Winter dry	Jharpani galand	India	93.8439	25.7558	3							1.909	Nonsaline	4.80176	Strongly acid	Clay loam		SWE	0	Foliar	0.83	1	2	0.1339	0.0179426	0.196	0.026264	0
674	113	Rathore S. S.	2009	10.1016/j.sajb.2008.10.020	soybean	Legumes	Cwa	Warm temperate	Winter dry	Jharpani galand	India	93.8439	25.7558	3							1.909	Nonsaline	4.80176	Strongly acid	Clay loam		SWE	0	Foliar	1	1	2	0.1339	0.0179426	0.2109	0.0282606	0
675	114	Chouliaras Vassilios	2009	10.1002/jsfa.3544	olive	Others	Csb	Warm temperate	Summer dry	Peloponnesus	Greece	22.3735	37.5079	3													SWE	0	Foliar	1	0	1	0.459172	0.0409581	0.667456	0.059537	0
676	115	Zodape ST	2008		okra	Vegetables	As	Equatorial	Summer dry	Panjabrao Deshmukh Krishi VidyapeethAkola	India	77.0371	20.7006	4													SWE	0	Foliar	0.25	1	2	0.579	0.0559893	0.6975	0.0674483	0
677	115	Zodape ST	2008		okra	Vegetables	As	Equatorial	Summer dry	Panjabrao Deshmukh Krishi VidyapeethAkola	India	77.0371	20.7006	4													SWE	0	Foliar	1	1	2	0.579	0.0559893	0.6471	0.0625746	0
678	115	Zodape ST	2008		okra	Vegetables	As	Equatorial	Summer dry	Panjabrao Deshmukh Krishi VidyapeethAkola	India	77.0371	20.7006	4													SWE	0	Foliar	0.75	1	2	0.579	0.0559893	0.6138	0.0593545	0
679	115	Zodape ST	2008		okra	Vegetables	As	Equatorial	Summer dry	Panjabrao Deshmukh Krishi VidyapeethAkola	India	77.0371	20.7006	4													SWE	0	Foliar	1	1	2	0.579	0.0559893	0.5707	0.0551867	0
680	116	Atta, M. M. M.	2016		maize	Cereals	BWh	Arid	Desert	Giza	Egypt	31.2089	30.0131	4		38.15	9.45	Very low	220	Optimal	3.594	Slightly saline	7.60885	Moderately alkaline	Clay loam	VIUSID agro	PHs	1	Foliar	0.48	1	1	0.730539	0.0310479	0.920479	0.0391204	0
681	116	Atta, M. M. M.	2017		maize	Cereals	BWh	Arid	Desert	Giza	Egypt	31.2089	30.0131	4		38.15	9.45	Very low	220	Optimal	3.594	Slightly saline	7.60885	Moderately alkaline	Clay loam	VIUSID agro	PHs	1	Foliar	0.72	1	1	0.730539	0.0310479	0.685629	0.0291392	0
682	116	Atta, M. M. M.	2017		maize	Cereals	BWh	Arid	Desert	Giza	Egypt	31.2089	30.0131	4		38.15	9.45	Very low	220	Optimal	3.594	Slightly saline	7.60885	Moderately alkaline	Clay loam	VIUSID agro	PHs	1	Foliar	1	1	1	0.730539	0.0310479	0.562874	0.0239222	0
683	117	Kuisma Paavo	1989		potato	Root/tuber crops	Dfb	Boreal	Fully humid	Viikki	Finland	25.0201	60.2251	3											Sandy loam	SM3	SWE	1	Foliar	0.25	1	3	3.563	0.338841	3.84	0.365184	0
684	117	Kuisma Paavo	1989		potato	Root/tuber crops	Dfb	Boreal	Fully humid	Viikki	Finland	25.0201	60.2251	3											Sandy loam	SM3	SWE	1	Foliar	0.5	1	3	3.563	0.338841	3.727	0.354438	0
685	117	Kuisma Paavo	1989		potato	Root/tuber crops	Dfb	Boreal	Fully humid	Viikki	Finland	25.0201	60.2251	3											Sandy loam	SM3	SWE	1	Foliar	1	1	3	3.563	0.338841	3.832	0.364423	0
686	118	Prokkola Soile	2007	10.2137/145960607781635886	strawberry	Fruits	Dfc	Boreal	Fully humid	Mikkeli	Finland	27.2721	61.6887	6											Sand	Biolan	SWE	1	Foliar	1	0	5	0.281	0.046365	0.287	0.047355	1
687	118	Prokkola Soile	2007	10.2137/145960607781635886	strawberry	Fruits	Dfc	Boreal	Fully humid	Mikkeli	Finland	27.2721	61.6887	6											Sand	Kekkila Oy	Si	1	Foliar	1	0	5	0.281	0.046365	0.291	0.048015	1
688	118	Prokkola Soile	2007	10.2137/145960607781635886	strawberry	Fruits	Dfc	Boreal	Fully humid	Mikkeli	Finland	27.2721	61.6887	6											Sand	Garlic extract	PE	0	Foliar	1	0	5	0.281	0.046365	0.263	0.043395	1
689	118	Prokkola Soile	2007	10.2137/145960607781635886	strawberry	Fruits	Dfc	Boreal	Fully humid	Mikkeli	Finland	27.2721	61.6887	6											Sand	Biolan	SWE	1	Foliar	1	0	5	0.384	0.06336	0.423	0.069795	2
690	118	Prokkola Soile	2007	10.2137/145960607781635886	strawberry	Fruits	Dfc	Boreal	Fully humid	Mikkeli	Finland	27.2721	61.6887	6											Sand	Kekkila Oy	Si	1	Foliar	1	0	5	0.384	0.06336	0.415	0.068475	2
691	118	Prokkola Soile	2007	10.2137/145960607781635886	strawberry	Fruits	Dfc	Boreal	Fully humid	Mikkeli	Finland	27.2721	61.6887	6											Sand	Garlic extract	PE	0	Foliar	1	0	5	0.384	0.06336	0.385	0.063525	2
692	119	Morales-Payan J. P.	2003		papaya	Fruits	Am	Equatorial	Monsoonal	La Altagracia	Dominican Republic	-68.6201	18.585	4												Siapton	PHs	1	Foliar	1	0	1	3.91624	0.64618	3.91803	0.646475	0
693	119	Morales-Payan J. P.	2003		papaya	Fruits	Am	Equatorial	Monsoonal	La Altagracia	Dominican Republic	-68.6201	18.585	4												Siapton	PHs	1	Foliar	1	0	3	3.91624	0.64618	4.22735	0.697513	0
694	119	Morales-Payan J. P.	2003		papaya	Fruits	Am	Equatorial	Monsoonal	La Altagracia	Dominican Republic	-68.6201	18.585	4												Siapton	PHs	1	Foliar	1	0	4	3.91624	0.64618	4.40781	0.727289	0
695	119	Morales-Payan J. P.	2003		papaya	Fruits	Am	Equatorial	Monsoonal	La Altagracia	Dominican Republic	-68.6201	18.585	4												Siapton	PHs	1	Foliar	1	0	5	3.91624	0.64618	4.602	0.75933	0
696	119	Morales-Payan J. P.	2003		papaya	Fruits	Am	Equatorial	Monsoonal	La Altagracia	Dominican Republic	-68.6201	18.585	4												Siapton	PHs	1	Foliar	1	0	6	3.91624	0.64618	4.79978	0.791964	0
697	120	Norrie J.	2002	10.17660/ActaHortic.2002.594.39	grape	Fruits	Dfb	Boreal	Fully humid	Dartmouth Nova Scotia	Canada	-63.5676	44.6661	5												Acadian	SWE	1	Foliar	0.67	1	4	1.651	0.272415	2.06	0.3399	0
698	120	Norrie J.	2002	10.17660/ActaHortic.2002.594.41	grape	Fruits	Dfb	Boreal	Fully humid	Dartmouth Nova Scotia	Canada	-63.5676	44.6661	5												Acadian	SWE	1	Foliar	1	1	3	1.651	0.272415	1.884	0.31086	0
699	120	Norrie J.	2002	10.17660/ActaHortic.2002.594.43	grape	Fruits	Dfb	Boreal	Fully humid	Dartmouth Nova Scotia	Canada	-63.5676	44.6661	5												Acadian	SWE	1	Foliar	0.67	1	3	1.651	0.272415	1.868	0.30822	0
700	121	Atteya, A. K. G.	2018		Zinnia	Others	BWh	Arid	Desert	Kom Hamada	Egypt	30.6968	30.7634	3					109.262	Medium	2.2	Slightly saline	7.89571	Moderately alkaline	Clay loam	yeast	PHs	0	Foliar	0.33	1	continuous	0.10219	0.00903364	0.155548	0.0137504	1
701	121	Atteya, A. K. G.	2018		Zinnia	Others	BWh	Arid	Desert	Kom Hamada	Egypt	30.6968	30.7634	3					109.262	Medium	2.2	Slightly saline	7.89571	Moderately alkaline	Clay loam	yeast	PHs	0	Foliar	0.67	1	continuous	0.10219	0.00903364	0.294643	0.0260464	1
702	121	Atteya, A. K. G.	2018		Zinnia	Others	BWh	Arid	Desert	Kom Hamada	Egypt	30.6968	30.7634	3					109.262	Medium	2.2	Slightly saline	7.89571	Moderately alkaline	Clay loam	yeast	PHs	0	Foliar	1	1	continuous	0.10219	0.00903364	0.217619	0.0192375	1
703	121	Atteya, A. K. G.	2018		Zinnia	Others	BWh	Arid	Desert	Kom Hamada	Egypt	30.6968	30.7634	3					109.262	Medium	2.2	Slightly saline	7.89571	Moderately alkaline	Clay loam	yeast	PHs	0	Foliar	0.33	1	continuous	0.108976	0.0096335	0.163429	0.0144471	2
704	121	Atteya, A. K. G.	2018		Zinnia	Others	BWh	Arid	Desert	Kom Hamada	Egypt	30.6968	30.7634	3					109.262	Medium	2.2	Slightly saline	7.89571	Moderately alkaline	Clay loam	yeast	PHs	0	Foliar	0.67	1	continuous	0.108976	0.0096335	0.320429	0.0283259	2
705	121	Atteya, A. K. G.	2018		Zinnia	Others	BWh	Arid	Desert	Kom Hamada	Egypt	30.6968	30.7634	3					109.262	Medium	2.2	Slightly saline	7.89571	Moderately alkaline	Clay loam	yeast	PHs	0	Foliar	1	1	continuous	0.108976	0.0096335	0.232929	0.0205909	2
706	122	Lopez-Mosquera ME	1997		potato	Root/tuber crops	Csb	Warm temperate	Summer dry	MuxiaGalicia	Spain	-9.21829	43.1042	3	0.28		70.5	Optimal	159.9	Optimal	0.28	Nonsaline	5.30376	Moderately acid			SWE	0	Soil	0.25	1	1	0.55	0.052305	0.74	0.070374	0
707	122	Lopez-Mosquera ME	1997		potato	Root/tuber crops	Csb	Warm temperate	Summer dry	MuxiaGalicia	Spain	-9.21829	43.1042	3	0.28		70.5	Optimal	159.9	Optimal	0.28	Nonsaline	5.30376	Moderately acid			SWE	0	Soil	0.5	1	1	0.55	0.052305	0.74	0.070374	0
708	122	Lopez-Mosquera ME	1997		potato	Root/tuber crops	Csb	Warm temperate	Summer dry	MuxiaGalicia	Spain	-9.21829	43.1042	3	0.28		70.5	Optimal	159.9	Optimal	0.28	Nonsaline	5.30376	Moderately acid			SWE	0	Soil	1	1	1	0.55	0.052305	1.16	0.110316	0
709	123	Eris Atilla	1995	10.17660/ActaHortic.1995.412.22	pepper	Vegetables	Csa	Warm temperate	Summer dry	Karacabeybursa	Turkey	28.359	40.216	3												Maxicrop	SWE	1	Foliar	1	0	5	3.86667	0.373907	4.06833	0.393408	0
710	123	Eris Atilla	1995	10.17660/ActaHortic.1995.412.24	pepper	Vegetables	Csa	Warm temperate	Summer dry	Karacabeybursa	Turkey	28.359	40.216	3												Maxicrop	SWE	1	Foliar	1	0	5	3.86667	0.373907	5.53792	0.535517	0
711	123	Eris Atilla	1995	10.17660/ActaHortic.1995.412.26	pepper	Vegetables	Csa	Warm temperate	Summer dry	Karacabeybursa	Turkey	28.359	40.216	3												Maxicrop	SWE	1	Foliar	1	0	5	3.86667	0.373907	4.7075	0.455215	0
712	124	Bakry, A. B.	2016		wheat	Cereals	BWh	Arid	Desert	El Beheira Governorate	Egypt	30.3436	30.8481	3			11.75	Very low	16.79	Very low	0.7575	Nonsaline	7.70106	Moderately alkaline	Sand		HFA	0	Foliar	1	0	2	0.233048	0.00990452	0.367405	0.0156147	0
713	125	Farouk, S.	2010	10.3923/ajps.2012.36.43	tomato	Vegetables	BWh	Arid	Desert	Mansoura	Egypt	31.3785	31.0409	3		43	14	Very low	289	Optimal	2.7339	Slightly saline	7.6	Moderately alkaline	Clay		Chi	0	Foliar	1	0	2	7.2088	0.697091	7.4725	0.722591	1
714	125	Farouk, S.	2010	10.3923/ajps.2012.36.43	tomato	Vegetables	BWh	Arid	Desert	Mansoura	Egypt	31.3785	31.0409	3		43	14	Very low	289	Optimal	2.7339	Slightly saline	7.6	Moderately alkaline	Clay		HFA	0	Foliar	1	0	2	7.2088	0.697091	9.4945	0.918118	1
715	125	Farouk, S.	2010	10.3923/ajps.2012.36.43	tomato	Vegetables	BWh	Arid	Desert	Mansoura	Egypt	31.3785	31.0409	3		43	14	Very low	289	Optimal	2.7339	Slightly saline	7.6	Moderately alkaline	Clay		SWE	0	Foliar	1	0	2	7.2088	0.697091	9.4945	0.918118	1
716	125	Farouk, S.	2010	10.3923/ajps.2012.36.43	tomato	Vegetables	BWh	Arid	Desert	Mansoura	Egypt	31.3785	31.0409	3		43	14	Very low	289	Optimal	2.7339	Slightly saline	7.6	Moderately alkaline	Clay		Chi	0	Foliar	1	0	2	7.0769	0.684336	7.6044	0.735345	2
717	125	Farouk, S.	2010	10.3923/ajps.2012.36.43	tomato	Vegetables	BWh	Arid	Desert	Mansoura	Egypt	31.3785	31.0409	3		43	14	Very low	289	Optimal	2.7339	Slightly saline	7.6	Moderately alkaline	Clay		HFA	0	Foliar	1	0	2	7.0769	0.684336	8.7912	0.850109	2
718	125	Farouk, S.	2010	10.3923/ajps.2012.36.43	tomato	Vegetables	BWh	Arid	Desert	Mansoura	Egypt	31.3785	31.0409	3		43	14	Very low	289	Optimal	2.7339	Slightly saline	7.6	Moderately alkaline	Clay		SWE	0	Foliar	1	0	2	7.0769	0.684336	9.7143	0.939373	2
719	126	Di Mola, Ida	2020	10.3390/agronomy10020278	spich	Vegetables	Csa	Warm temperate	Summer dry	Portici	Italy	14.3391	40.8141	3	0.09		252.6	Optimal	490.9	Optimal			7.40395	Moderately alkaline	Sand	Trainer	PHs	1	Foliar	1	0	4	0.8138	0.067	0.948	0.067	0
720	126	Di Mola, Ida	2020	10.3390/agronomy10020278	lettuce	Vegetables	Csa	Warm temperate	Summer dry	Portici	Italy	14.3391	40.8141	3	0.09		252.6	Optimal	490.9	Optimal			7.40395	Moderately alkaline	Sand	Trainer	PHs	1	Foliar	1	0	4	1.0654	0.0168	1.3423	0.0168	0
721	127	Ahmed, YM	2012	10.5829/idosi.jhsop.2012.4.3.252	cucumber	Vegetables	BWh	Arid	Desert	Cairo	Egypt	31.2357	30.0444	3												Red alga	SWE	0	Foliar	1	0	3	1.74595	0.168834	1.835	0.177444	1
722	127	Ahmed, YM	2012	10.5829/idosi.jhsop.2012.4.3.252	cucumber	Vegetables	BWh	Arid	Desert	Cairo	Egypt	31.2357	30.0444	3												Red alga	SWE	0	Foliar	1	0	3	1.74595	0.168834	2.07619	0.200768	1
723	127	Ahmed, YM	2012	10.5829/idosi.jhsop.2012.4.3.252	cucumber	Vegetables	BWh	Arid	Desert	Cairo	Egypt	31.2357	30.0444	3												Green alga	SWE	0	Foliar	1	0	3	1.74595	0.168834	1.88571	0.182349	1
724	127	Ahmed, YM	2012	10.5829/idosi.jhsop.2012.4.3.252	cucumber	Vegetables	BWh	Arid	Desert	Cairo	Egypt	31.2357	30.0444	3												Algreen	SWE	1	Foliar	1	0	3	1.74595	0.168834	1.89833	0.183569	1
725	127	Ahmed, YM	2012	10.5829/idosi.jhsop.2012.4.3.252	cucumber	Vegetables	BWh	Arid	Desert	Cairo	Egypt	31.2357	30.0444	3												Red alga	SWE	0	Foliar	1	0	3	1.84762	0.178665	1.86667	0.180507	2
726	127	Ahmed, YM	2012	10.5829/idosi.jhsop.2012.4.3.252	cucumber	Vegetables	BWh	Arid	Desert	Cairo	Egypt	31.2357	30.0444	3												Red alga	SWE	0	Foliar	1	0	3	1.84762	0.178665	2.17857	0.210668	2
727	127	Ahmed, YM	2012	10.5829/idosi.jhsop.2012.4.3.252	cucumber	Vegetables	BWh	Arid	Desert	Cairo	Egypt	31.2357	30.0444	3												Green alga	SWE	0	Foliar	1	0	3	1.84762	0.178665	1.90476	0.18419	2
728	127	Ahmed, YM	2012	10.5829/idosi.jhsop.2012.4.3.252	cucumber	Vegetables	BWh	Arid	Desert	Cairo	Egypt	31.2357	30.0444	3												Algreen	SWE	1	Foliar	1	0	3	1.84762	0.178665	1.9119	0.184881	2
729	128	Baqir, Haar	2018		wheat	Cereals	BWh	Arid	Desert	Jadriyah	Iraq	44.3851	33.2796	3		35	10.2	Very low	165	Optimal	5.241	Moderately saline	7.7113	Moderately alkaline	Sandy loam	yeast	PHs	0	Foliar	0.5	1	2	0.391	0.0166175	0.499	0.0212075	1
730	128	Baqir, Haar	2018		wheat	Cereals	BWh	Arid	Desert	Jadriyah	Iraq	44.3851	33.2796	3		35	10.2	Very low	165	Optimal	5.241	Moderately saline	7.7113	Moderately alkaline	Sandy loam	yeast	PHs	0	Foliar	1	1	2	0.391	0.0166175	0.538	0.022865	1
731	128	Baqir, Haar	2018		wheat	Cereals	BWh	Arid	Desert	Jadriyah	Iraq	44.3851	33.2796	3		35	10.2	Very low	165	Optimal	5.241	Moderately saline	7.7113	Moderately alkaline	Sandy loam	yeast	PHs	0	Soil	0.5	1	2	0.391	0.0166175	0.539	0.0229075	1
732	128	Baqir, Haar	2018		wheat	Cereals	BWh	Arid	Desert	Jadriyah	Iraq	44.3851	33.2796	3		35	10.2	Very low	165	Optimal	5.241	Moderately saline	7.7113	Moderately alkaline	Sandy loam	yeast	PHs	0	Soil	1	1	2	0.391	0.0166175	0.571	0.0242675	1
733	128	Baqir, Haar	2018		wheat	Cereals	BWh	Arid	Desert	Jadriyah	Iraq	44.3851	33.2796	3		30	8.22	Very low	151	Optimal	4.326	Moderately saline	7.64983	Moderately alkaline	Sandy loam	yeast	PHs	0	Foliar	0.5	1	2	0.375	0.0159375	0.375	0.0159375	2
734	128	Baqir, Haar	2018		wheat	Cereals	BWh	Arid	Desert	Jadriyah	Iraq	44.3851	33.2796	3		30	8.22	Very low	151	Optimal	4.326	Moderately saline	7.64983	Moderately alkaline	Sandy loam	yeast	PHs	0	Foliar	1	1	2	0.47	0.019975	0.503	0.0213775	2
735	128	Baqir, Haar	2018		wheat	Cereals	BWh	Arid	Desert	Jadriyah	Iraq	44.3851	33.2796	3		30	8.22	Very low	151	Optimal	4.326	Moderately saline	7.64983	Moderately alkaline	Sandy loam	yeast	PHs	0	Soil	0.5	1	2	0.375	0.0159375	0.514	0.021845	2
736	128	Baqir, Haar	2018		wheat	Cereals	BWh	Arid	Desert	Jadriyah	Iraq	44.3851	33.2796	3		30	8.22	Very low	151	Optimal	4.326	Moderately saline	7.64983	Moderately alkaline	Sandy loam	yeast	PHs	0	Soil	1	1	2	0.375	0.0159375	0.545	0.0231625	2
737	129	Al-Tawaha, AM	2006		soybean	Legumes	Dfb	Boreal	Fully humid	Sainte-Anne- de-Bellevue, QC	Canada	-73.9504	45.4033	4													Chi	0	Foliar	1	0	1	0.115385	0.0154615	0.165568	0.0221861	1
738	129	Al-Tawaha, AM	2006		soybean	Legumes	Dfb	Boreal	Fully humid	Sainte-Anne- de-Bellevue, QC	Canada	-73.9504	45.4033	4													Chi	0	Foliar	1	0	1	0.115385	0.0154615	0.126007	0.016885	1
739	129	Al-Tawaha, AM	2006		soybean	Legumes	Dfb	Boreal	Fully humid	Sainte-Anne- de-Bellevue, QC	Canada	-73.9504	45.4033	4													Chi	0	Foliar	1	0	1	0.202564	0.0271436	0.324176	0.0434396	2
740	129	Al-Tawaha, AM	2006		soybean	Legumes	Dfb	Boreal	Fully humid	Sainte-Anne- de-Bellevue, QC	Canada	-73.9504	45.4033	4													Chi	0	Foliar	1	0	1	0.202564	0.0271436	0.49707	0.0666073	2
741	129	Al-Tawaha, AM	2006		soybean	Legumes	Dfb	Boreal	Fully humid	Sainte-Anne- de-Bellevue, QC	Canada	-73.9504	45.4033	4													Chi	0	Foliar	1	0	1	0.161172	0.0215971	0.361172	0.0483971	1
742	129	Al-Tawaha, AM	2006		soybean	Legumes	Dfb	Boreal	Fully humid	Sainte-Anne- de-Bellevue, QC	Canada	-73.9504	45.4033	4													Chi	0	Foliar	1	0	1	0.161172	0.0215971	0.181685	0.0243458	1
743	129	Al-Tawaha, AM	2006		soybean	Legumes	Dfb	Boreal	Fully humid	Sainte-Anne- de-Bellevue, QC	Canada	-73.9504	45.4033	4													Chi	0	Foliar	1	0	1	0.190476	0.0255238	0.390476	0.0523238	2
744	129	Al-Tawaha, AM	2006		soybean	Legumes	Dfb	Boreal	Fully humid	Sainte-Anne- de-Bellevue, QC	Canada	-73.9504	45.4033	4													Chi	0	Foliar	1	0	1	0.190476	0.0255238	0.435531	0.0583612	2
745	130	Mondal, MMA	2013		maize	Cereals	Am	Equatorial	Monsoonal	Mymensingh	Bangladesh	90.4203	24.7471	3											Sandy loam		Chi	0	Foliar	0.4	1	3	0.51	0.021675	0.464	0.01972	1
746	130	Mondal, MMA	2013		maize	Cereals	Am	Equatorial	Monsoonal	Mymensingh	Bangladesh	90.4203	24.7471	3											Sandy loam		Chi	0	Foliar	0.6	1	3	0.51	0.021675	0.559	0.0237575	1
747	130	Mondal, MMA	2013		maize	Cereals	Am	Equatorial	Monsoonal	Mymensingh	Bangladesh	90.4203	24.7471	3											Sandy loam		Chi	0	Foliar	0.8	1	3	0.51	0.021675	0.632	0.02686	1
748	130	Mondal, MMA	2013		maize	Cereals	Am	Equatorial	Monsoonal	Mymensingh	Bangladesh	90.4203	24.7471	3											Sandy loam		Chi	0	Foliar	1	1	3	0.51	0.021675	0.595	0.0252875	1
749	130	Mondal, MMA	2013		maize	Cereals	Am	Equatorial	Monsoonal	Mymensingh	Bangladesh	90.4203	24.7471	3											Sandy loam		Chi	0	Foliar	0.4	1	3	0.605	0.0257125	0.657	0.0279225	2
750	130	Mondal, MMA	2013		maize	Cereals	Am	Equatorial	Monsoonal	Mymensingh	Bangladesh	90.4203	24.7471	3											Sandy loam		Chi	0	Foliar	0.6	1	3	0.605	0.0257125	0.675	0.0286875	2
751	130	Mondal, MMA	2013		maize	Cereals	Am	Equatorial	Monsoonal	Mymensingh	Bangladesh	90.4203	24.7471	3											Sandy loam		Chi	0	Foliar	0.8	1	3	0.605	0.0257125	0.724	0.03077	2
752	130	Mondal, MMA	2013		maize	Cereals	Am	Equatorial	Monsoonal	Mymensingh	Bangladesh	90.4203	24.7471	3											Sandy loam		Chi	0	Foliar	1	1	3	0.605	0.0257125	0.763	0.0324275	2
753	131	Elrys, A. S.	2017	10.21608/agro.2017.1429.1072	pea	Legumes	BWh	Arid	Desert	El-Salhia El- Gdida	Egypt	31.8733	30.6547	3		27.4	5.64	Very low	55.9	Very low	4.7811	Moderately saline	8.14158	Moderately alkaline	Sand	licorice root extract	PE	0	Foliar	1	0	3	0.127586	0.0170966	0.142529	0.0190989	1
754	131	Elrys, A. S.	2017	10.21608/agro.2017.1429.1074	pea	Legumes	BWh	Arid	Desert	El-Salhia El- Gdida	Egypt	31.8733	30.6547	3		27.4	5.64	Very low	55.9	Very low	4.7811	Moderately saline	8.14158	Moderately alkaline	Sand	licorice root extract	PE	0	Foliar	1	0	3	0.127586	0.0170966	0.165517	0.0221793	1
755	131	Elrys, A. S.	2017	10.21608/agro.2017.1429.1076	pea	Legumes	BWh	Arid	Desert	El-Salhia El- Gdida	Egypt	31.8733	30.6547	3		27.4	5.64	Very low	55.9	Very low	4.7811	Moderately saline	8.14158	Moderately alkaline	Sand	SiO2	Si	0	Foliar	1	0	3	0.127586	0.0170966	0.190805	0.0255678	1
756	131	Elrys, A. S.	2017	10.21608/agro.2017.1429.1078	pea	Legumes	BWh	Arid	Desert	El-Salhia El- Gdida	Egypt	31.8733	30.6547	3		27.4	5.64	Very low	55.9	Very low	4.7811	Moderately saline	8.14158	Moderately alkaline	Sand	SiO2	Si	0	Foliar	1	0	3	0.127586	0.0170966	0.254023	0.0340391	1
757	131	Elrys, A. S.	2017	10.21608/agro.2017.1429.1080	pea	Legumes	BWh	Arid	Desert	El-Salhia El- Gdida	Egypt	31.8733	30.6547	3		28.7	6.15	Very low	52.3	Very low	5.1914	Moderately saline	8.12109	Moderately alkaline	Sand	licorice root extract	PE	0	Foliar	1	0	3	0.121839	0.0163264	0.135632	0.0181747	2
758	131	Elrys, A. S.	2017	10.21608/agro.2017.1429.1082	pea	Legumes	BWh	Arid	Desert	El-Salhia El- Gdida	Egypt	31.8733	30.6547	3		28.7	6.15	Very low	52.3	Very low	5.1914	Moderately saline	8.12109	Moderately alkaline	Sand	licorice root extract	PE	0	Foliar	1	0	3	0.121839	0.0163264	0.173563	0.0232575	2
759	131	Elrys, A. S.	2017	10.21608/agro.2017.1429.1072	pea	Legumes	BWh	Arid	Desert	El-Salhia El- Gdida	Egypt	31.8733	30.6547	3		28.7	6.15	Very low	52.3	Very low	5.1914	Moderately saline	8.12109	Moderately alkaline	Sand	SiO2	Si	0	Foliar	1	0	3	0.121839	0.0163264	0.190805	0.0255678	2
760	131	Elrys, A. S.	2017	10.21608/agro.2017.1429.1074	pea	Legumes	BWh	Arid	Desert	El-Salhia El- Gdida	Egypt	31.8733	30.6547	3		28.7	6.15	Very low	52.3	Very low	5.1914	Moderately saline	8.12109	Moderately alkaline	Sand	SiO2	Si	0	Foliar	1	0	3	0.121839	0.0163264	0.254023	0.0340391	2
761	132	Sharma, L.	2017	10.1016/j.jclepro.2017.02.154	rice	Cereals	Aw	Equatorial	Winter dry	West Bengal	India	87.855	22.9868	3									5.49841	Moderately acid			SWE	0	Foliar	0.15	1	3	0.444	0.01887	0.476	0.02023	0
762	132	Sharma, L.	2017	10.1016/j.jclepro.2017.02.156	rice	Cereals	Aw	Equatorial	Winter dry	West Bengal	India	87.855	22.9868	3									5.49841	Moderately acid			SWE	0	Foliar	0.3	1	3	0.444	0.01887	0.5	0.02125	0
763	132	Sharma, L.	2017	10.1016/j.jclepro.2017.02.158	rice	Cereals	Aw	Equatorial	Winter dry	West Bengal	India	87.855	22.9868	3									5.49841	Moderately acid			SWE	0	Foliar	0.5	1	3	0.444	0.01887	0.53	0.022525	0
764	132	Sharma, L.	2017	10.1016/j.jclepro.2017.02.160	rice	Cereals	Aw	Equatorial	Winter dry	West Bengal	India	87.855	22.9868	3									5.49841	Moderately acid			SWE	0	Foliar	0.67	1	3	0.444	0.01887	0.547	0.0232475	0
765	132	Sharma, L.	2017	10.1016/j.jclepro.2017.02.162	rice	Cereals	Aw	Equatorial	Winter dry	West Bengal	India	87.855	22.9868	3									5.49841	Moderately acid			SWE	0	Foliar	1	1	3	0.444	0.01887	0.574	0.024395	0
766	132	Sharma, L.	2017	10.1016/j.jclepro.2017.02.164	rice	Cereals	Aw	Equatorial	Winter dry	West Bengal	India	87.855	22.9868	3									5.49841	Moderately acid			SWE	0	Foliar	0.15	1	3	0.444	0.01887	0.472	0.02006	0
767	132	Sharma, L.	2017	10.1016/j.jclepro.2017.02.166	rice	Cereals	Aw	Equatorial	Winter dry	West Bengal	India	87.855	22.9868	3									5.49841	Moderately acid			SWE	0	Foliar	0.3	1	3	0.444	0.01887	0.493	0.0209525	0
768	132	Sharma, L.	2017	10.1016/j.jclepro.2017.02.168	rice	Cereals	Aw	Equatorial	Winter dry	West Bengal	India	87.855	22.9868	3									5.49841	Moderately acid			SWE	0	Foliar	0.5	1	3	0.444	0.01887	0.522	0.022185	0
769	132	Sharma, L.	2017	10.1016/j.jclepro.2017.02.170	rice	Cereals	Aw	Equatorial	Winter dry	West Bengal	India	87.855	22.9868	3									5.49841	Moderately acid			SWE	0	Foliar	0.67	1	3	0.444	0.01887	0.561	0.0238425	0
770	132	Sharma, L.	2017	10.1016/j.jclepro.2017.02.172	rice	Cereals	Aw	Equatorial	Winter dry	West Bengal	India	87.855	22.9868	3									5.49841	Moderately acid			SWE	0	Foliar	1	1	3	0.444	0.01887	0.569	0.0241825	0
771	133	Zodape, S. T.	2011		tomato	Vegetables	BSh	Arid	Steppe	Udaipur, Rajasthan	India	73.7125	24.5854	5							1.8372	Nonsaline	7.99816	Moderately alkaline			SWE	0	Foliar	0.25	1	2	2.368	0.228986	3.135	0.303154	0
772	133	Zodape, S. T.	2011		tomato	Vegetables	BSh	Arid	Steppe	Udaipur, Rajasthan	India	73.7125	24.5854	5							1.8372	Nonsaline	7.99816	Moderately alkaline			SWE	0	Foliar	0.5	1	2	2.368	0.228986	3.809	0.36833	0
773	133	Zodape, S. T.	2011		tomato	Vegetables	BSh	Arid	Steppe	Udaipur, Rajasthan	India	73.7125	24.5854	5							1.8372	Nonsaline	7.99816	Moderately alkaline			SWE	0	Foliar	0.75	1	2	2.368	0.228986	3.512	0.33961	0
774	133	Zodape, S. T.	2011		tomato	Vegetables	BSh	Arid	Steppe	Udaipur, Rajasthan	India	73.7125	24.5854	5							1.8372	Nonsaline	7.99816	Moderately alkaline			SWE	0	Foliar	1	1	2	2.368	0.228986	3.251	0.314372	0
775	134	de Carvalho, R. P.	2019	10.1007/s10811-018-1724-7	grape	Fruits	Cwa	Warm temperate	Winter dry	Lavras-MG	Brazil	-45.0014	-21.2485	5			18.4	Low	89	Low			6.19506	Slightly acid	Clay		SWE	0	Foliar	1	0	4	1.138	0.18777	1.41	0.23265	0
776	134	de Carvalho, R. P.	2019	10.1007/s10811-018-1724-7	grape	Fruits	Cwa	Warm temperate	Winter dry	Lavras-MG	Brazil	-45.0014	-21.2485	5			18.4	Low	89	Low			6.19506	Slightly acid	Clay		SWE	0	Foliar	1	0	4	1.138	0.18777	1.207	0.199155	0
777	134	de Carvalho, R. P.	2019	10.1007/s10811-018-1724-7	grape	Fruits	Cwa	Warm temperate	Winter dry	Lavras-MG	Brazil	-45.0014	-21.2485	5			18.4	Low	89	Low			6.19506	Slightly acid	Clay		SWE	0	Foliar	1	0	4	1.138	0.18777	1.284	0.21186	0
778	134	de Carvalho, R. P.	2019	10.1007/s10811-018-1724-7	grape	Fruits	Cwa	Warm temperate	Winter dry	Lavras-MG	Brazil	-45.0014	-21.2485	5			18.4	Low	89	Low			6.19506	Slightly acid	Clay		SWE	0	Foliar	1	0	4	1.138	0.18777	1.172	0.19338	0
779	135	Yasmeen, A.	2015	10.17957/ijab/15.0213	cotton	Others	BWh	Arid	Desert	Shujabad	Pakistan	71.3231	29.8717	3	0.052						2.1483	Slightly saline	7.89571	Moderately alkaline	Silt loam	MLE	PE	0	Foliar	1	0	3	0.2902	0.0256537	0.3279	0.0289864	0
780	135	Yasmeen, A.	2015	10.17957/ijab/15.0213	cotton	Others	BWh	Arid	Desert	Shujabad	Pakistan	71.3231	29.8717	3	0.052						2.1483	Slightly saline	7.89571	Moderately alkaline	Silt loam	MLE	PE	0	Foliar	1	0	3	0.355	0.031382	0.3857	0.0340959	0
781	135	Yasmeen, A.	2015	10.17957/ijab/15.0213	cotton	Others	BWh	Arid	Desert	Shujabad	Pakistan	71.3231	29.8717	3	0.021						2.1483	Slightly saline	7.89571	Moderately alkaline	Silt loam	MLE	PE	0	Foliar	1	0	3	0.2797	0.0247255	0.3122	0.0275985	0
782	135	Yasmeen, A.	2015	10.17957/ijab/15.0213	cotton	Others	BWh	Arid	Desert	Shujabad	Pakistan	71.3231	29.8717	3	0.021						2.1483	Slightly saline	7.89571	Moderately alkaline	Silt loam	MLE	PE	0	Foliar	1	0	3	0.3136	0.0277222	0.3446	0.0304626	0
783	136	Wilczewski, E.	2018	10.5513/jcea01/19.1.2033	suger beet	Others	Cfb	Warm temperate	Fully humid	Chrzastowo	Poland	19.0504	51.3997	4			172.8	Optimal	185	Optimal			7.83424	Moderately alkaline			HFA	0	Soil	1	0	1	7.53	0.102	7.77	0.135	0
784	137	Desoky, E. M.	2019	10.1016/j.ecoenv.2018.10.118	pepper	Vegetables	BWh	Arid	Desert	Sharkyya	Egypt	31.7195	30.7327	3		33.9	8.72	Very low	104	Medium	14.2629	Strongly saline	7.322		Loam	licorice root extract	PE	0	Soil	1	0	2	1.7	0.16439	2.14	0.206938	2
785	137	Desoky, E. M.	2019	10.1016/j.ecoenv.2018.10.120	pepper	Vegetables	BWh	Arid	Desert	Sharkyya	Egypt	31.7195	30.7327	3		33.9	8.72	Very low	104	Medium	14.2629	Strongly saline	7.322		Loam	licorice root extract	PE	0	Foliar	1	0	2	1.7	0.16439	1.86	0.179862	2
786	137	Desoky, E. M.	2019	10.1016/j.ecoenv.2018.10.122	pepper	Vegetables	BWh	Arid	Desert	Sharkyya	Egypt	31.7195	30.7327	3		33.9	8.72	Very low	104	Medium	14.2629	Strongly saline	7.322		Loam	MLE	PE	0	Soil	1	0	2	1.7	0.16439	3.29	0.318143	2
787	137	Desoky, E. M.	2019	10.1016/j.ecoenv.2018.10.124	pepper	Vegetables	BWh	Arid	Desert	Sharkyya	Egypt	31.7195	30.7327	3		33.9	8.72	Very low	104	Medium	14.2629	Strongly saline	7.322		Loam	MLE	PE	0	Foliar	1	0	2	1.7	0.16439	2.97	0.287199	2
788	137	Desoky, E. M.	2019	10.1016/j.ecoenv.2018.10.126	pepper	Vegetables	BWh	Arid	Desert	Sharkyya	Egypt	31.7195	30.7327	3		31.9	7.87	Very low	103	Medium	14.3544	Strongly saline	7.28102	Neutral	Loam	licorice root extract	PE	0	Soil	1	0	2	1.77	0.171159	2.19	0.211773	3
789	137	Desoky, E. M.	2019	10.1016/j.ecoenv.2018.10.128	pepper	Vegetables	BWh	Arid	Desert	Sharkyya	Egypt	31.7195	30.7327	3		31.9	7.87	Very low	103	Medium	14.3544	Strongly saline	7.28102	Neutral	Loam	licorice root extract	PE	0	Foliar	1	0	2	1.77	0.171159	2.05	0.198235	3
790	137	Desoky, E. M.	2019	10.1016/j.ecoenv.2018.10.130	pepper	Vegetables	BWh	Arid	Desert	Sharkyya	Egypt	31.7195	30.7327	3		31.9	7.87	Very low	103	Medium	14.3544	Strongly saline	7.28102	Neutral	Loam	MLE	PE	0	Soil	1	0	2	1.77	0.171159	3.34	0.322978	3
791	137	Desoky, E. M.	2019	10.1016/j.ecoenv.2018.10.132	pepper	Vegetables	BWh	Arid	Desert	Sharkyya	Egypt	31.7195	30.7327	3		31.9	7.87	Very low	103	Medium	14.3544	Strongly saline	7.28102	Neutral	Loam	MLE	PE	0	Foliar	1	0	2	1.77	0.171159	3.24	0.313308	3
792	137	Desoky, E. M.	2019	10.1016/j.ecoenv.2018.10.134	pepper	Vegetables	BWh	Arid	Desert	Sharkyya	Egypt	31.7195	30.7327	3		124.8	17.2	Low	142.5	Optimal	2.679	Slightly saline	7.69081	Moderately alkaline	Loam	licorice root extract	PE	0	Soil	1	0	2	5.92	0.572464	6.04	0.584068	1
793	137	Desoky, E. M.	2019	10.1016/j.ecoenv.2018.10.136	pepper	Vegetables	BWh	Arid	Desert	Sharkyya	Egypt	31.7195	30.7327	3		124.8	17.2	Low	142.5	Optimal	2.679	Slightly saline	7.69081	Moderately alkaline	Loam	licorice root extract	PE	0	Foliar	1	0	2	5.92	0.572464	6.15	0.594705	1
794	137	Desoky, E. M.	2019	10.1016/j.ecoenv.2018.10.138	pepper	Vegetables	BWh	Arid	Desert	Sharkyya	Egypt	31.7195	30.7327	3		124.8	17.2	Low	142.5	Optimal	2.679	Slightly saline	7.69081	Moderately alkaline	Loam	MLE	PE	0	Soil	1	0	2	5.92	0.572464	6.03	0.583101	1
795	137	Desoky, E. M.	2019	10.1016/j.ecoenv.2018.10.140	pepper	Vegetables	BWh	Arid	Desert	Sharkyya	Egypt	31.7195	30.7327	3		124.8	17.2	Low	142.5	Optimal	2.679	Slightly saline	7.69081	Moderately alkaline	Loam	MLE	PE	0	Foliar	1	0	2	5.92	0.572464	6.09	0.588903	1
796	137	Desoky, E. M.	2019	10.1016/j.ecoenv.2018.10.117	pepper	Vegetables	BWh	Arid	Desert	Sharkyya	Egypt	31.7195	30.7327	3		32.2	8.74	Very low	102	Medium	12.5976	Strongly saline	8.38746	Moderately alkaline	Loam	licorice root extract	PE	0	Soil	1	0	2	1.63	0.157621	2.53	0.244651	1
797	137	Desoky, E. M.	2019	10.1016/j.ecoenv.2018.10.119	pepper	Vegetables	BWh	Arid	Desert	Sharkyya	Egypt	31.7195	30.7327	3		32.2	8.74	Very low	102	Medium	12.5976	Strongly saline	8.38746	Moderately alkaline	Loam	licorice root extract	PE	0	Foliar	1	0	2	1.63	0.157621	3.37	0.325879	1
798	137	Desoky, E. M.	2019	10.1016/j.ecoenv.2018.10.121	pepper	Vegetables	BWh	Arid	Desert	Sharkyya	Egypt	31.7195	30.7327	3		32.2	8.74	Very low	102	Medium	12.5976	Strongly saline	8.38746	Moderately alkaline	Loam	MLE	PE	0	Soil	1	0	2	1.63	0.157621	3.47	0.335549	1
799	137	Desoky, E. M.	2019	10.1016/j.ecoenv.2018.10.123	pepper	Vegetables	BWh	Arid	Desert	Sharkyya	Egypt	31.7195	30.7327	3		32.2	8.74	Very low	102	Medium	12.5976	Strongly saline	8.38746	Moderately alkaline	Loam	MLE	PE	0	Foliar	1	0	2	1.63	0.157621	3.37	0.325879	1
800	138	Trivedi, K.	2017	10.1007/s10811-017-1118-2	maize	Cereals	BSh	Arid	Steppe	Gujarat	India	71.1924	22.2587	3							0.3732	Nonsaline	6.97367	Neutral	Sandy loam		SWE	0	Foliar	1	0	1	0.328319	0.0228613	0.374041	0.0125369	0
801	138	Trivedi, K.	2017	10.1007/s10811-017-1118-2	maize	Cereals	BSh	Arid	Steppe	Gujarat	India	71.1924	22.2587	3							0.3732	Nonsaline	6.97367	Neutral	Sandy loam		SWE	0	Foliar	1	0	1	0.325369	0.00737463	0.343805	0.0169617	0
802	138	Trivedi, K.	2017	10.1007/s10811-017-1118-2	maize	Cereals	BSh	Arid	Steppe	Gujarat	India	71.1924	22.2587	3							0.3732	Nonsaline	6.97367	Neutral	Sandy loam		SWE	0	Foliar	1	0	1	0.331268	0.019174	0.368879	0.00442478	0
803	138	Trivedi, K.	2017	10.1007/s10811-017-1118-2	maize	Cereals	BSh	Arid	Steppe	Gujarat	India	71.1924	22.2587	3							0.3732	Nonsaline	6.97367	Neutral	Sandy loam		SWE	0	Foliar	1	0	2	0.330531	0.0132743	0.381416	0.00516224	0
804	138	Trivedi, K.	2017	10.1007/s10811-017-1118-2	maize	Cereals	BSh	Arid	Steppe	Gujarat	India	71.1924	22.2587	3							0.3732	Nonsaline	6.97367	Neutral	Sandy loam		SWE	0	Foliar	1	0	2	0.328319	0.020649	0.379204	0.0103245	0
805	138	Trivedi, K.	2017	10.1007/s10811-017-1118-2	maize	Cereals	BSh	Arid	Steppe	Gujarat	India	71.1924	22.2587	3							0.3732	Nonsaline	6.97367	Neutral	Sandy loam		SWE	0	Foliar	1	0	2	0.318732	0.0117994	0.421239	0.0117994	0
806	138	Trivedi, K.	2017	10.1007/s10811-017-1118-2	maize	Cereals	BSh	Arid	Steppe	Gujarat	India	71.1924	22.2587	3							0.3732	Nonsaline	6.97367	Neutral	Sandy loam		SWE	0	Foliar	1	0	3	0.324631	0.0154867	0.430826	0.00081121	0
807	138	Trivedi, K.	2017	10.1007/s10811-017-1118-2	maize	Cereals	BSh	Arid	Steppe	Gujarat	India	71.1924	22.2587	3							0.3732	Nonsaline	6.97367	Neutral	Sandy loam		SWE	0	Foliar	1	0	3	0.328319	0.0317109	0.430826	0.00081121	0
808	138	Trivedi, K.	2017	10.1007/s10811-017-1118-2	maize	Cereals	BSh	Arid	Steppe	Gujarat	India	71.1924	22.2587	3							0.3732	Nonsaline	6.97367	Neutral	Sandy loam		SWE	0	Foliar	1	0	4	0.323156	0.0110619	0.425664	0.00221239	0
809	138	Trivedi, K.	2017	10.1007/s10811-017-1118-2	maize	Cereals	BSh	Arid	Steppe	Gujarat	India	71.1924	22.2587	3							0.3732	Nonsaline	6.97367	Neutral	Sandy loam		SWE	0	Foliar	1	0	5	0.334218	0.0169617	0.424926	0.00884956	0
810	139	Temiz, M.	2009		cotton	Others	Csa	Warm temperate	Summer dry	Diyarbakir	Turkey	40.211	37.925	3													HFA	0	Foliar	1	0	1	0.416229	0.0367946	0.422482	0.0373474	0
811	139	Temiz, M.	2009		cotton	Others	Csa	Warm temperate	Summer dry	Diyarbakir	Turkey	40.211	37.925	3													HFA	0	Seed	1	0	1	0.416229	0.0367946	0.448234	0.0396239	0
812	140	Tadayyon, A.	2017	10.1080/01904167.2016.1270321	Niger Plant	Others	Csa	Warm temperate	Summer dry	Shahrekord	Iran	50.8769	32.3282	3	0.09		31.4	Medium	596	Optimal	1.1235	Nonsaline	7.63959	Moderately alkaline	Clay loam		HFA	0	Foliar	0.17	1	3	0.04048	0.00357843	0.06669	0.0058954	0
813	140	Tadayyon, A.	2017	10.1080/01904167.2016.1270321	Niger Plant	Others	Csa	Warm temperate	Summer dry	Shahrekord	Iran	50.8769	32.3282	3			31.4	Medium	596	Optimal	1.1235	Nonsaline	7.63959	Moderately alkaline	Clay loam		HFA	0	Foliar	0.5	1	3	0.04048	0.00357843	0.0852	0.00753168	0
814	140	Tadayyon, A.	2017	10.1080/01904167.2016.1270321	Niger Plant	Others	Csa	Warm temperate	Summer dry	Shahrekord	Iran	50.8769	32.3282	3			31.4	Medium	596	Optimal	1.1235	Nonsaline	7.63959	Moderately alkaline	Clay loam		HFA	0	Foliar	1	1	3	0.04048	0.00357843	0.10199	0.00901592	0
815	141	Sulakhudin	2019	10.17503/agrivita.v41i3.939	onion	Vegetables	Af	Equatorial	Fully humid	West Kalimantan	Indonesia	111.475	-0.278781	3	0.57		37.6	Optimal	124.8	Medium			3.9	Strongly acid			SWE	0	Foliar	1	0	3	0.0803	0.00776501	0.0883	0.00853861	0
816	141	Sulakhudin	2019	10.17503/agrivita.v41i3.939	onion	Vegetables	Af	Equatorial	Fully humid	West Kalimantan	Indonesia	111.475	-0.278781	3	0.57		37.6	Optimal	124.8	Medium			3.9	Strongly acid			SWE	0	Foliar	1	0	3	0.1097	0.010608	0.116	0.0112172	0
817	141	Sulakhudin	2019	10.17503/agrivita.v41i3.939	onion	Vegetables	Af	Equatorial	Fully humid	West Kalimantan	Indonesia	111.475	-0.278781	3	0.57		37.6	Optimal	124.8	Medium			3.9	Strongly acid			SWE	0	Foliar	1	0	3	0.1283	0.0124066	0.1307	0.0126387	0
818	142	Shaheen, A. M.	2018		sp bean	Legumes	BWh	Arid	Desert	Behera governorate	Egypt	30.3436	30.8481	3							3.777	Slightly saline	7.9	Moderately alkaline	Sand	AMINO MIX	PHs	1	Seed	1	0	1	0.357	0.047838	0.81	0.10854	0
819	142	Shaheen, A. M.	2018		sp bean	Legumes	BWh	Arid	Desert	Behera governorate	Egypt	30.3436	30.8481	3							3.777	Slightly saline	7.9	Moderately alkaline	Sand	AMINO MIX	PHs	1	Foliar	1	0	3	0.429	0.057486	1.095	0.14673	0
820	143	Saad-Allah, K. M.	2017	10.1016/j.jarmap.2017.02.006	milk thistle	Others	BWh	Arid	Desert	Tanta	Egypt	31.0106	30.8607	4												yeast	PHs	0	Foliar	0.25	1	2	0.0706	0.00624104	0.07244	0.0064037	0
821	143	Saad-Allah, K. M.	2017	10.1016/j.jarmap.2017.02.006	milk thistle	Others	BWh	Arid	Desert	Tanta	Egypt	31.0106	30.8607	4												yeast	PHs	0	Foliar	0.5	1	2	0.0706	0.00624104	0.07532	0.00665829	0
822	143	Saad-Allah, K. M.	2017	10.1016/j.jarmap.2017.02.006	milk thistle	Others	BWh	Arid	Desert	Tanta	Egypt	31.0106	30.8607	4												yeast	PHs	0	Foliar	1	1	2	0.0706	0.00624104	0.07824	0.00691642	0
823	144	Raverkar, K. P.	2016	10.18805/1r.v39i2.9535	mung bean	Legumes	Cwa	Warm temperate	Winter dry	Pantgar	India	79.4908	29.0222	3							0.3366	Nonsaline	7.70106	Moderately alkaline			SWE	0	Foliar	0.17	1	2	0.04165	0.0055811	0.05386	0.00721724	0
824	144	Raverkar, K. P.	2016	10.18805/1r.v39i2.9535	mung bean	Legumes	Cwa	Warm temperate	Winter dry	Pantgar	India	79.4908	29.0222	3							0.3366	Nonsaline	7.70106	Moderately alkaline			SWE	0	Foliar	0.33	1	2	0.04165	0.0055811	0.05436	0.00728424	0
825	144	Raverkar, K. P.	2016	10.18805/1r.v39i2.9535	mung bean	Legumes	Cwa	Warm temperate	Winter dry	Pantgar	India	79.4908	29.0222	3							0.3366	Nonsaline	7.70106	Moderately alkaline			SWE	0	Foliar	0.67	1	2	0.04165	0.0055811	0.05573	0.00746782	0
826	144	Raverkar, K. P.	2016	10.18805/1r.v39i2.9535	mung bean	Legumes	Cwa	Warm temperate	Winter dry	Pantgar	India	79.4908	29.0222	3							0.3366	Nonsaline	7.70106	Moderately alkaline			SWE	0	Foliar	1	1	2	0.04165	0.0055811	0.05418	0.00726012	0
827	144	Raverkar, K. P.	2016	10.18805/1r.v39i2.9535	mung bean	Legumes	Cwa	Warm temperate	Winter dry	Pantgar	India	79.4908	29.0222	3							0.3366	Nonsaline	7.70106	Moderately alkaline			SWE	0	Foliar	0.17	1	2	0.04165	0.0055811	0.05237	0.00701758	0
828	144	Raverkar, K. P.	2016	10.18805/1r.v39i2.9535	mung bean	Legumes	Cwa	Warm temperate	Winter dry	Pantgar	India	79.4908	29.0222	3							0.3366	Nonsaline	7.70106	Moderately alkaline			SWE	0	Foliar	0.33	1	2	0.04165	0.0055811	0.05241	0.00702294	0
829	144	Raverkar, K. P.	2016	10.18805/1r.v39i2.9535	mung bean	Legumes	Cwa	Warm temperate	Winter dry	Pantgar	India	79.4908	29.0222	3							0.3366	Nonsaline	7.70106	Moderately alkaline			SWE	0	Foliar	0.67	1	2	0.04165	0.0055811	0.05254	0.00704036	0
830	144	Raverkar, K. P.	2016	10.18805/1r.v39i2.9535	mung bean	Legumes	Cwa	Warm temperate	Winter dry	Pantgar	India	79.4908	29.0222	3							0.3366	Nonsaline	7.70106	Moderately alkaline			SWE	0	Foliar	1	1	2	0.04165	0.0055811	0.05239	0.00702026	0
831	145	Rady, M. M.	2015	10.1016/j.scienta.2015.07.003	Common bean	Legumes	BWh	Arid	Desert	Beni Sueif Governorate	Egypt	31.4456	28.8939	3		152.6	12.2	Very low	144.2	Optimal	11.5179	Strongly saline	7.72154	Moderately alkaline	Clay	MLE	PE	0	Seed	1	0	1	0.157	0.021038	0.173	0.023182	1
832	145	Rady, M. M.	2015	10.1016/j.scienta.2015.07.003	Common bean	Legumes	BWh	Arid	Desert	Beni Sueif Governorate	Egypt	31.4456	28.8939	3		152.6	12.2	Very low	144.2	Optimal	11.5179	Strongly saline	7.72154	Moderately alkaline	Clay	MLE	PE	0	Foliar	1	0	2	0.157	0.021038	0.172	0.023048	1
833	145	Rady, M. M.	2015	10.1016/j.scienta.2015.07.003	Common bean	Legumes	BWh	Arid	Desert	Beni Sueif Governorate	Egypt	31.4456	28.8939	3		148.4	11.4	Very low	138.9	Optimal	11.6094	Strongly saline	7.76252	Moderately alkaline	Clay	MLE	PE	0	Seed	1	0	1	0.159	0.021306	0.178	0.023852	2
834	145	Rady, M. M.	2015	10.1016/j.scienta.2015.07.003	Common bean	Legumes	BWh	Arid	Desert	Beni Sueif Governorate	Egypt	31.4456	28.8939	3		148.4	11.4	Very low	138.9	Optimal	11.6094	Strongly saline	7.76252	Moderately alkaline	Clay	MLE	PE	0	Foliar	1	0	2	0.159	0.021306	0.176	0.023584	2
835	146	Radkowski, A.	2018	10.5601/jelem.2017.22.4.1511	meadow	Others	Dfb	Boreal	Fully humid	Małopolska	Poland	20.2503	49.7225	4			126	Optimal	162	Optimal						Microfert	PHs	1	Foliar	0.4	1	3	1.056	0.0933504	1.116	0.0986544	1
836	146	Radkowski, A.	2018	10.5601/jelem.2017.22.4.1511	meadow	Others	Dfb	Boreal	Fully humid	Małopolska	Poland	20.2503	49.7225	4			126	Optimal	162	Optimal						Microfert	PHs	1	Foliar	1	1	3	1.056	0.0933504	1.186	0.104842	1
837	146	Radkowski, A.	2018	10.5601/jelem.2017.22.4.1511	meadow	Others	Dfb	Boreal	Fully humid	Małopolska	Poland	20.2503	49.7225	4			126	Optimal	162	Optimal						Microfert	PHs	1	Foliar	0.4	1	3	1.033	0.0913172	1.063	0.0939692	2
838	146	Radkowski, A.	2018	10.5601/jelem.2017.22.4.1511	meadow	Others	Dfb	Boreal	Fully humid	Małopolska	Poland	20.2503	49.7225	4			126	Optimal	162	Optimal						Microfert	PHs	1	Foliar	1	1	3	1.033	0.0913172	1.155	0.102102	2
839	146	Radkowski, A.	2018	10.5601/jelem.2017.22.4.1511	meadow	Others	Dfb	Boreal	Fully humid	Małopolska	Poland	20.2503	49.7225	4			126	Optimal	162	Optimal						Microfert	PHs	1	Foliar	0.4	1	3	1.061	0.0937924	1.108	0.0979472	3
840	146	Radkowski, A.	2018	10.5601/jelem.2017.22.4.1511	meadow	Others	Dfb	Boreal	Fully humid	Małopolska	Poland	20.2503	49.7225	4			126	Optimal	162	Optimal						Microfert	PHs	1	Foliar	1	1	3	1.061	0.0937924	1.175	0.10387	3
841	147	Pramanick, B.	2016		blackgram	Legumes	Aw	Equatorial	Winter dry	dia	India	88.5565	23.471	3	0.057								6.45	Slightly acid	Sandy clay loam		SWE	0	Foliar	0.17	1	3	0.0895	0.011993	0.1116	0.0149544	0
842	147	Pramanick, B.	2016		blackgram	Legumes	Aw	Equatorial	Winter dry	dia	India	88.5565	23.471	3	0.057								6.45	Slightly acid	Sandy clay loam		SWE	0	Foliar	0.33	1	3	0.0895	0.011993	0.1132	0.0151688	0
843	147	Pramanick, B.	2016		blackgram	Legumes	Aw	Equatorial	Winter dry	dia	India	88.5565	23.471	3	0.057								6.45	Slightly acid	Sandy clay loam		SWE	0	Foliar	0.67	1	3	0.0895	0.011993	0.1286	0.0172324	0
844	147	Pramanick, B.	2016		blackgram	Legumes	Aw	Equatorial	Winter dry	dia	India	88.5565	23.471	3	0.057								6.45	Slightly acid	Sandy clay loam		SWE	0	Foliar	1	1	3	0.0895	0.011993	0.1352	0.0181168	0
845	147	Pramanick, B.	2016		blackgram	Legumes	Aw	Equatorial	Winter dry	dia	India	88.5565	23.471	3	0.057								6.45	Slightly acid	Sandy clay loam		SWE	0	Foliar	0.17	1	3	0.0895	0.011993	0.1097	0.0146998	0
846	147	Pramanick, B.	2016		blackgram	Legumes	Aw	Equatorial	Winter dry	dia	India	88.5565	23.471	3	0.057								6.45	Slightly acid	Sandy clay loam		SWE	0	Foliar	0.33	1	3	0.0895	0.011993	0.1115	0.014941	0
847	147	Pramanick, B.	2016		blackgram	Legumes	Aw	Equatorial	Winter dry	dia	India	88.5565	23.471	3	0.057								6.45	Slightly acid	Sandy clay loam		SWE	0	Foliar	0.67	1	3	0.0895	0.011993	0.1209	0.0162006	0
848	147	Pramanick, B.	2016		blackgram	Legumes	Aw	Equatorial	Winter dry	dia	India	88.5565	23.471	3	0.057								6.45	Slightly acid	Sandy clay loam		SWE	0	Foliar	1	1	3	0.0895	0.011993	0.1317	0.0176478	0
849	148	En, Saam	2016		suger beet	Others	BWh	Arid	Desert	Wadi El trun	Egypt	30.2426	30.4336	3		11.5	1.3	Very low	62.5	Low	0.9405	Nonsaline	7.93669	Moderately alkaline	Sand		SWE	0	Foliar	0.43	1	2	5.60238	0.0868369	5.99286	0.0928893	1
850	148	En, Saam	2016		suger beet	Others	BWh	Arid	Desert	Wadi El trun	Egypt	30.2426	30.4336	3		11.5	1.3	Very low	62.5	Low	0.9405	Nonsaline	7.93669	Moderately alkaline	Sand		SWE	0	Foliar	0.14	1	2	5.60238	0.0868369	6.1381	0.0951405	1
851	148	En, Saam	2016		suger beet	Others	BWh	Arid	Desert	Wadi El trun	Egypt	30.2426	30.4336	3		11.5	1.3	Very low	62.5	Low	0.9405	Nonsaline	7.93669	Moderately alkaline	Sand		SWE	0	Foliar	1	1	2	5.60238	0.0868369	6.32857	0.0980929	1
852	148	En, Saam	2016		suger beet	Others	BWh	Arid	Desert	Wadi El trun	Egypt	30.2426	30.4336	3		12.6	1.7	Very low	66.5	Low	0.7575	Nonsaline	8.0084	Moderately alkaline	Sand		SWE	0	Foliar	0.43	1	2	5.43333	0.0842167	5.73571	0.0889036	2
853	148	En, Saam	2016		suger beet	Others	BWh	Arid	Desert	Wadi El trun	Egypt	30.2426	30.4336	3		12.6	1.7	Very low	66.5	Low	0.7575	Nonsaline	8.0084	Moderately alkaline	Sand		SWE	0	Foliar	0.14	1	2	5.43333	0.0842167	5.86667	0.0909333	2
854	148	En, Saam	2016		suger beet	Others	BWh	Arid	Desert	Wadi El trun	Egypt	30.2426	30.4336	3		12.6	1.7	Very low	66.5	Low	0.7575	Nonsaline	8.0084	Moderately alkaline	Sand		SWE	0	Foliar	1	1	2	5.43333	0.0842167	6.03333	0.0935167	2
855	149	Almadi, Leen	2020	10.3390/agriculture10120618	Olive	Fruits	Cfa	Warm temperate	Fully humid	San Fortunato	Italy	12.406	42.7803	6												Sinergon 3000	PHs	1	Soil	1	0	4	0.0467273	0.00771	0.0578182	0.00954	0
856	150	Khazaie, H. R.	2011		hyssop	Others	BSk	Arid	Steppe	Mashhad	Iran	59.6168	36.2605	3		200	9.4	Very low	120	Medium	0.3183	Nonsaline	7.49616	Moderately alkaline	Silt loam		HFA	0	Foliar	0.33	1	2	1.439	0.127208	1.58	0.139672	1
857	150	Khazaie, H. R.	2011		hyssop	Others	BSk	Arid	Steppe	Mashhad	Iran	59.6168	36.2605	3		200	9.4	Very low	120	Medium	0.3183	Nonsaline	7.49616	Moderately alkaline	Silt loam		HFA	0	Foliar	0.67	1	2	1.439	0.127208	1.722	0.152225	1
858	150	Khazaie, H. R.	2011		hyssop	Others	BSk	Arid	Steppe	Mashhad	Iran	59.6168	36.2605	3		200	9.4	Very low	120	Medium	0.3183	Nonsaline	7.49616	Moderately alkaline	Silt loam		HFA	0	Foliar	1	1	2	1.439	0.127208	2.75	0.2431	1
859	150	Khazaie, H. R.	2011		hyssop	Others	BSk	Arid	Steppe	Mashhad	Iran	59.6168	36.2605	3		200	9.4	Very low	120	Medium	0.3183	Nonsaline	7.49616	Moderately alkaline	Silt loam		HFA	0	Foliar	0.33	1	2	1.503	0.132865	1.532	0.135429	2
860	150	Khazaie, H. R.	2011		hyssop	Others	BSk	Arid	Steppe	Mashhad	Iran	59.6168	36.2605	3		200	9.4	Very low	120	Medium	0.3183	Nonsaline	7.49616	Moderately alkaline	Silt loam		HFA	0	Foliar	0.67	1	2	1.503	0.132865	1.822	0.161065	2
861	150	Khazaie, H. R.	2011		hyssop	Others	BSk	Arid	Steppe	Mashhad	Iran	59.6168	36.2605	3		200	9.4	Very low	120	Medium	0.3183	Nonsaline	7.49616	Moderately alkaline	Silt loam		HFA	0	Foliar	1	1	2	1.503	0.132865	2.805	0.247962	2
862	151	Jadhao, G. R.	2015		blackgram	Legumes	BSh	Arid	Steppe	Maharashtra	India	75.7139	19.7515	4							1.7225	Nonsaline	7.8035	Moderately alkaline	Clay		SWE	0	Foliar	0.17	1	2	0.0101	0.0013534	0.0107	0.0014338	0
863	151	Jadhao, G. R.	2015		blackgram	Legumes	BSh	Arid	Steppe	Maharashtra	India	75.7139	19.7515	4							1.7225	Nonsaline	7.8035	Moderately alkaline	Clay		SWE	0	Foliar	0.33	1	2	0.0101	0.0013534	0.0125	0.001675	0
864	151	Jadhao, G. R.	2015		blackgram	Legumes	BSh	Arid	Steppe	Maharashtra	India	75.7139	19.7515	4							1.7225	Nonsaline	7.8035	Moderately alkaline	Clay		SWE	0	Foliar	0.67	1	2	0.0101	0.0013534	0.0149	0.0019966	0
865	151	Jadhao, G. R.	2015		blackgram	Legumes	BSh	Arid	Steppe	Maharashtra	India	75.7139	19.7515	4							1.7225	Nonsaline	7.8035	Moderately alkaline	Clay		SWE	0	Foliar	1	1	2	0.0101	0.0013534	0.0131	0.0017554	0
866	151	Jadhao, G. R.	2015		blackgram	Legumes	BSh	Arid	Steppe	Maharashtra	India	75.7139	19.7515	4							1.7225	Nonsaline	7.8035	Moderately alkaline	Clay		SWE	0	Foliar	0.17	1	2	0.0101	0.0013534	0.0112	0.0015008	0
867	151	Jadhao, G. R.	2015		blackgram	Legumes	BSh	Arid	Steppe	Maharashtra	India	75.7139	19.7515	4							1.7225	Nonsaline	7.8035	Moderately alkaline	Clay		SWE	0	Foliar	0.33	1	2	0.0101	0.0013534	0.0127	0.0017018	0
868	151	Jadhao, G. R.	2015		blackgram	Legumes	BSh	Arid	Steppe	Maharashtra	India	75.7139	19.7515	4							1.7225	Nonsaline	7.8035	Moderately alkaline	Clay		SWE	0	Foliar	0.67	1	2	0.0101	0.0013534	0.0144	0.0019296	0
869	151	Jadhao, G. R.	2015		blackgram	Legumes	BSh	Arid	Steppe	Maharashtra	India	75.7139	19.7515	4							1.7225	Nonsaline	7.8035	Moderately alkaline	Clay		SWE	0	Foliar	1	1	2	0.0101	0.0013534	0.0129	0.0017286	0
870	152	Consentino, B. B.	2020	10.3390/plants9121633	celery	Vegetables	Csa	Warm temperate	Summer dry	Marsala	Italy	12.4372	37.7981	3	2		68	Optimal	547.8	Optimal			8.5			animal-derived	PHs	1	Foliar	1	0	continuous	1.21266	0.117264	1.31308	0.126975	0
871	152	Consentino, B. B.	2020	10.3390/plants9121634	celery	Vegetables	Csa	Warm temperate	Summer dry	Marsala	Italy	12.4372	37.7981	3	2		68	Optimal	547.8	Optimal			8.5			plant-derived TYSON, ASWELL	PHs	1	Foliar	1	0	continuous	1.21266	0.117264	1.67608	0.162077	0
872	153	Di Stasio, E.	2020	10.3390/agronomy10101559	tomato	Vegetables	Cfa	Warm temperate	Fully humid	Portici	Italy	14.97	43.5167	3	0.12								7.5	Moderately alkaline	Silty clay loam	Rygex	SWE	1	Soil	1	0	4	1.7012	0.164506	2.40459	0.232524	0
873	153	Di Stasio, E.	2020	10.3390/agronomy10101560	tomato	Vegetables	Cfa	Warm temperate	Fully humid	Portici	Italy	14.97	43.5167	3	0.12								7.5	Moderately alkaline	Silty clay loam	Super Fifty	SWE	1	Soil	1	0	4	1.7012	0.164506	2.72485	0.263493	0
874	154	Elzaawely, A. A.	2018	10.1080/03650340.2017.1410543	snap bean	Legumes	BWh	Arid	Desert	Dokki	Egypt	31.2025	30.0395	3		37.7	76	Optimal	158.9	Optimal	2.76	Slightly saline	7.88	Moderately alkaline	Clay loam	garlic cloves extract	PE	0	Foliar	0.25	1	2	0.651389	0.0872861	0.68262	0.091471	1
875	154	Elzaawely, A. A.	2018	10.1080/03650340.2017.1410544	snap bean	Legumes	BWh	Arid	Desert	Dokki	Egypt	31.2025	30.0395	3		37.7	76	Optimal	158.9	Optimal	2.76	Slightly saline	7.88	Moderately alkaline	Clay loam	garlic cloves extract	PE	0	Foliar	0.5	1	2	0.651389	0.0872861	0.727235	0.0974495	1
876	154	Elzaawely, A. A.	2018	10.1080/03650340.2017.1410545	snap bean	Legumes	BWh	Arid	Desert	Dokki	Egypt	31.2025	30.0395	3		37.7	76	Optimal	158.9	Optimal	2.76	Slightly saline	7.88	Moderately alkaline	Clay loam	garlic cloves extract	PE	0	Foliar	1	1	2	0.651389	0.0872861	0.758466	0.101634	1
877	154	Elzaawely, A. A.	2018	10.1080/03650340.2017.1410546	snap bean	Legumes	BWh	Arid	Desert	Dokki	Egypt	31.2025	30.0395	3		37.7	76	Optimal	158.9	Optimal	2.76	Slightly saline	7.88	Moderately alkaline	Clay loam	garlic cloves extract	PE	0	Foliar	0.25	1	2	0.65585	0.0878839	0.680389	0.0911721	2
878	154	Elzaawely, A. A.	2018	10.1080/03650340.2017.1410547	snap bean	Legumes	BWh	Arid	Desert	Dokki	Egypt	31.2025	30.0395	3		37.7	76	Optimal	158.9	Optimal	2.76	Slightly saline	7.88	Moderately alkaline	Clay loam	garlic cloves extract	PE	0	Foliar	0.5	1	2	0.65585	0.0878839	0.698235	0.0935635	2
879	154	Elzaawely, A. A.	2018	10.1080/03650340.2017.1410548	snap bean	Legumes	BWh	Arid	Desert	Dokki	Egypt	31.2025	30.0395	3		37.7	76	Optimal	158.9	Optimal	2.76	Slightly saline	7.88	Moderately alkaline	Clay loam	garlic cloves extract	PE	0	Foliar	1	1	2	0.65585	0.0878839	0.733928	0.0983463	2
880	155	Elzaawely, A. A.	2017	10.1080/03650340.2016.1234042	snap bean	Legumes	BWh	Arid	Desert	Dokki	Egypt	31.2025	30.0395	3		31.7	81	Optimal	162.9	Optimal	2.86	Slightly saline	7.78	Moderately alkaline	Clay loam	MLE	PE	0	Foliar	0.25	1	2	7.27848	0.975316	8.76582	1.17462	1
881	155	Elzaawely, A. A.	2017	10.1080/03650340.2016.1234043	snap bean	Legumes	BWh	Arid	Desert	Dokki	Egypt	31.2025	30.0395	3		31.7	81	Optimal	162.9	Optimal	2.86	Slightly saline	7.78	Moderately alkaline	Clay loam	MLE	PE	0	Foliar	0.5	1	2	7.27848	0.975316	9.11392	1.22127	1
882	155	Elzaawely, A. A.	2017	10.1080/03650340.2016.1234044	snap bean	Legumes	BWh	Arid	Desert	Dokki	Egypt	31.2025	30.0395	3		31.7	81	Optimal	162.9	Optimal	2.86	Slightly saline	7.78	Moderately alkaline	Clay loam	MLE	PE	0	Foliar	1	1	2	7.27848	0.975316	9.24051	1.23823	1
883	155	Elzaawely, A. A.	2017	10.1080/03650340.2016.1234045	snap bean	Legumes	BWh	Arid	Desert	Dokki	Egypt	31.2025	30.0395	3		31.7	81	Optimal	162.9	Optimal	2.86	Slightly saline	7.78	Moderately alkaline	Clay loam	MLE	PE	0	Foliar	0.25	1	2	7.21519	0.966835	8.10127	1.08557	2
884	155	Elzaawely, A. A.	2017	10.1080/03650340.2016.1234046	snap bean	Legumes	BWh	Arid	Desert	Dokki	Egypt	31.2025	30.0395	3		31.7	81	Optimal	162.9	Optimal	2.86	Slightly saline	7.78	Moderately alkaline	Clay loam	MLE	PE	0	Foliar	0.5	1	2	7.21519	0.966835	8.79747	1.17886	2
885	155	Elzaawely, A. A.	2017	10.1080/03650340.2016.1234047	snap bean	Legumes	BWh	Arid	Desert	Dokki	Egypt	31.2025	30.0395	3		31.7	81	Optimal	162.9	Optimal	2.86	Slightly saline	7.78	Moderately alkaline	Clay loam	MLE	PE	0	Foliar	1	1	2	7.21519	0.966835	8.9557	1.20006	2
886	156	Han, X.	2021	10.1016/j.ecoenv.2020.111873	potato	Root/tuber crops	Cfa	Warm temperate	Fully humid	Youxi	China	118.19	26.1702	3		125.3	24.5	Low	67.8	Low			6.3	Slightly acid	Clay loam	potassium phosphite	Phi	0	Foliar	0.33	1	5	2.84413	0.0597865	3.22847	0.0683274	0
887	156	Han, X.	2021	10.1016/j.ecoenv.2020.111874	potato	Root/tuber crops	Cfa	Warm temperate	Fully humid	Youxi	China	118.19	26.1702	3		125.3	24.5	Low	67.8	Low			6.3	Slightly acid	Clay loam	potassium phosphite	Phi	0	Foliar	0.67	1	5	2.84413	0.0597865	3.45053	0.145196	0
888	156	Han, X.	2021	10.1016/j.ecoenv.2020.111875	potato	Root/tuber crops	Cfa	Warm temperate	Fully humid	Youxi	China	118.19	26.1702	3		125.3	24.5	Low	67.8	Low			6.3	Slightly acid	Clay loam	potassium phosphite	Phi	0	Foliar	1	1	5	2.84413	0.0597865	2.98078	0.0341637	0
889	156	Han, X.	2021	10.1016/j.ecoenv.2020.111876	potato	Root/tuber crops	Cfa	Warm temperate	Fully humid	Youxi	China	118.19	26.1702	3		125.3	24.5	Low	67.8	Low			6.3	Slightly acid	Clay loam	potassium phosphite	Phi	0	Foliar	0.33	1	5	2.9637	0.0768683	3.16014	0.0939502	0
890	156	Han, X.	2021	10.1016/j.ecoenv.2020.111877	potato	Root/tuber crops	Cfa	Warm temperate	Fully humid	Youxi	China	118.19	26.1702	3		125.3	24.5	Low	67.8	Low			6.3	Slightly acid	Clay loam	potassium phosphite	Phi	0	Foliar	0.67	1	5	2.9637	0.0768683	3.73238	0.136655	0
891	156	Han, X.	2021	10.1016/j.ecoenv.2020.111878	potato	Root/tuber crops	Cfa	Warm temperate	Fully humid	Youxi	China	118.19	26.1702	3		125.3	24.5	Low	67.8	Low			6.3	Slightly acid	Clay loam	potassium phosphite	Phi	0	Foliar	1	1	5	2.9637	0.0768683	3.43345	0.162278	0
892	156	Han, X.	2021	10.1016/j.ecoenv.2020.111879	potato	Root/tuber crops	Cfa	Warm temperate	Fully humid	Youxi	China	118.19	26.1702	3		125.3	24.5	Low	67.8	Low			6.3	Slightly acid	Clay loam	potassium phosphite	Phi	0	Foliar	0.33	1	5	2.50249	0.0768683	2.70747	0.111032	0
893	156	Han, X.	2021	10.1016/j.ecoenv.2020.111880	potato	Root/tuber crops	Cfa	Warm temperate	Fully humid	Youxi	China	118.19	26.1702	3		125.3	24.5	Low	67.8	Low			6.3	Slightly acid	Clay loam	potassium phosphite	Phi	0	Foliar	0.67	1	5	2.50249	0.0768683	2.59644	0.0341637	0
894	156	Han, X.	2021	10.1016/j.ecoenv.2020.111881	potato	Root/tuber crops	Cfa	Warm temperate	Fully humid	Youxi	China	118.19	26.1702	3		125.3	24.5	Low	67.8	Low			6.3	Slightly acid	Clay loam	potassium phosphite	Phi	0	Foliar	1	1	5	2.50249	0.0768683	2.53665	0.0683274	0
895	156	Han, X.	2021	10.1016/j.ecoenv.2020.111882	potato	Root/tuber crops	Cfa	Warm temperate	Fully humid	Youxi	China	118.19	26.1702	3		125.3	24.5	Low	67.8	Low			6.3	Slightly acid	Clay loam	potassium phosphite	Phi	0	Foliar	0.33	1	5	2.95516	0.0597865	3.01495	0.0683274	0
896	156	Han, X.	2021	10.1016/j.ecoenv.2020.111883	potato	Root/tuber crops	Cfa	Warm temperate	Fully humid	Youxi	China	118.19	26.1702	3		125.3	24.5	Low	67.8	Low			6.3	Slightly acid	Clay loam	potassium phosphite	Phi	0	Foliar	0.67	1	5	2.95516	0.0597865	3.5274	0.102491	0
897	156	Han, X.	2021	10.1016/j.ecoenv.2020.111884	potato	Root/tuber crops	Cfa	Warm temperate	Fully humid	Youxi	China	118.19	26.1702	3		125.3	24.5	Low	67.8	Low			6.3	Slightly acid	Clay loam	potassium phosphite	Phi	0	Foliar	1	1	5	2.95516	0.0597865	2.90391	0.102491	0
898	157	Anissa N	2019	101007/s40093-019-0245-y	mint	Others	Af	Equatorial	Fully humid	Ciparanje	Indonesia	107.77	-6.90968	3	0.15		4.09	Very low	547.9	Optimal	2.862	Slightly saline	5.81	Moderately acid	Clay	Chicken feathers and poultry litters	PHs	0	Soil	0.1	1	5	0.35625	0.1531	0.3906	0.13125	0
899	157	Anissa N	2019	101007/s40093-019-0245-y	mint	Others	Af	Equatorial	Fully humid	Ciparanje	Indonesia	107.77	-6.90968	3	0.15		4.09	Very low	547.9	Optimal	2.862	Slightly saline	5.81	Moderately acid	Clay	Chicken feathers and poultry litters	PHs	0	Soil	0.2	1	5	0.35625	0.1531	0.29685	0.0422	0
900	157	Anissa N	2019	101007/s40093-019-0245-y	mint	Others	Af	Equatorial	Fully humid	Ciparanje	Indonesia	107.77	-6.90968	3	0.15		4.09	Very low	547.9	Optimal	2.862	Slightly saline	5.81	Moderately acid	Clay	Chicken feathers and poultry litters	PHs	0	Soil	0.4	1	5	0.35625	0.1531	0.34375	0.07815	0
901	157	Anissa N	2019	101007/s40093-019-0245-y	mint	Others	Af	Equatorial	Fully humid	Ciparanje	Indonesia	107.77	-6.90968	3	0.15		4.09	Very low	547.9	Optimal	2.862	Slightly saline	5.81	Moderately acid	Clay	Chicken feathers and poultry litters	PHs	0	Soil	0.6	1	5	0.35625	0.1531	0.3375	0.1375	0
902	157	Anissa N	2019	101007/s40093-019-0245-y	mint	Others	Af	Equatorial	Fully humid	Ciparanje	Indonesia	107.77	-6.90968	3	0.15		4.09	Very low	547.9	Optimal	2.862	Slightly saline	5.81	Moderately acid	Clay	Chicken feathers and poultry litters	PHs	0	Soil	0.8	1	5	0.35625	0.1531	0.34685	0.2094	0
903	157	Anissa N	2019	101007/s40093-019-0245-y	mint	Others	Af	Equatorial	Fully humid	Ciparanje	Indonesia	107.77	-6.90968	3	0.15		4.09	Very low	547.9	Optimal	2.862	Slightly saline	5.81	Moderately acid	Clay	Chicken feathers and poultry litters	PHs	0	Soil	1	1	5	0.35625	0.1531	0.35155	0.05	0
904	157	Anissa N	2019	101007/s40093-019-0245-y	mung bean	Legumes	Af	Equatorial	Fully humid	Ciparanje	Indonesia	107.77	-6.90968	3	0.15		4.09	Very low	547.9	Optimal	2.862	Slightly saline	5.81	Moderately acid	Clay	Chicken feathers and poultry litters	PHs	0	Soil	0.1	1	2	0.08736	0.01192	0.122482	0.106544	0
905	157	Anissa N	2019	101007/s40093-019-0245-y	mung bean	Legumes	Af	Equatorial	Fully humid	Ciparanje	Indonesia	107.77	-6.90968	3	0.15		4.09	Very low	547.9	Optimal	2.862	Slightly saline	5.81	Moderately acid	Clay	Chicken feathers and poultry litters	PHs	0	Soil	0.2	1	2	0.08736	0.01192	0.145924	0.152307	0
906	157	Anissa N	2019	101007/s40093-019-0245-y	mung bean	Legumes	Af	Equatorial	Fully humid	Ciparanje	Indonesia	107.77	-6.90968	3	0.15		4.09	Very low	547.9	Optimal	2.862	Slightly saline	5.81	Moderately acid	Clay	Chicken feathers and poultry litters	PHs	0	Soil	0.4	1	2	0.08736	0.01192	0.169576	0.283149	0
907	157	Anissa N	2019	101007/s40093-019-0245-y	mung bean	Legumes	Af	Equatorial	Fully humid	Ciparanje	Indonesia	107.77	-6.90968	3	0.15		4.09	Very low	547.9	Optimal	2.862	Slightly saline	5.81	Moderately acid	Clay	Chicken feathers and poultry litters	PHs	0	Soil	0.6	1	2	0.08736	0.01192	0.16088	0.283149	0
908	157	Anissa N	2019	101007/s40093-019-0245-y	mung bean	Legumes	Af	Equatorial	Fully humid	Ciparanje	Indonesia	107.77	-6.90968	3	0.15		4.09	Very low	547.9	Optimal	2.862	Slightly saline	5.81	Moderately acid	Clay	Chicken feathers and poultry litters	PHs	0	Soil	0.8	1	2	0.08736	0.01192	0.126848	0.40857	0
909	157	Anissa N	2019	101007/s40093-019-0245-y	mung bean	Legumes	Af	Equatorial	Fully humid	Ciparanje	Indonesia	107.77	-6.90968	3	0.15		4.09	Very low	547.9	Optimal	2.862	Slightly saline	5.81	Moderately acid	Clay	Chicken feathers and poultry litters	PHs	0	Soil	1	1	2	0.08736	0.01192	0.141135	0.39486	0
910	158	Omer EA	2013		Chamomile	Others	BWh	Arid	Desert	Sinai Peninsula Egypt	Egypt	32.3431	30.9569	3		52.3333	4.49	Very low	187	Optimal	23.053	Strongly saline	8.21	Moderately alkaline	Sandy clay	Amino Total	PHs	1	Foliar	0.33	1	3	110	9.724	130	11.492	1
911	158	Omer EA	2013		Chamomile	Others	BWh	Arid	Desert	Sinai Peninsula Egypt	Egypt	32.3431	30.9569	3		52.3333	4.49	Very low	187	Optimal	23.053	Strongly saline	8.21	Moderately alkaline	Sandy clay	Amino Total	PHs	1	Foliar	0.67	1	3	110	9.724	160	14.144	1
912	158	Omer EA	2013		Chamomile	Others	BWh	Arid	Desert	Sinai Peninsula Egypt	Egypt	32.3431	30.9569	3		52.3333	4.49	Very low	187	Optimal	23.053	Strongly saline	8.21	Moderately alkaline	Sandy clay	Amino Total	PHs	1	Foliar	1	1	3	110	9.724	190	16.796	1
913	158	Omer EA	2013		Chamomile	Others	BWh	Arid	Desert	Sinai Peninsula Egypt	Egypt	32.3431	30.9569	3		52.3333	4.49	Very low	187	Optimal	23.053	Strongly saline	8.21	Moderately alkaline	Sandy clay	Amino Total	PHs	1	Foliar	0.33	1	3	1150	101.66	1230	108.732	1
914	158	Omer EA	2013		Chamomile	Others	BWh	Arid	Desert	Sinai Peninsula Egypt	Egypt	32.3431	30.9569	3		52.3333	4.49	Very low	187	Optimal	23.053	Strongly saline	8.21	Moderately alkaline	Sandy clay	Amino Total	PHs	1	Foliar	0.67	1	3	1150	101.66	1270	112.268	1
915	158	Omer EA	2013		Chamomile	Others	BWh	Arid	Desert	Sinai Peninsula Egypt	Egypt	32.3431	30.9569	3		52.3333	4.49	Very low	187	Optimal	23.053	Strongly saline	8.21	Moderately alkaline	Sandy clay	Amino Total	PHs	1	Foliar	1	1	3	1150	101.66	1330	117.572	1
916	158	Omer EA	2013		Chamomile	Others	BWh	Arid	Desert	Sinai Peninsula Egypt	Egypt	32.3431	30.9569	3		52.3333	4.49	Very low	187	Optimal	23.053	Strongly saline	8.21	Moderately alkaline	Sandy clay	Amino Total	PHs	1	Foliar	0.33	1	3	5090	449.956	5210	460.564	1
917	158	Omer EA	2013		Chamomile	Others	BWh	Arid	Desert	Sinai Peninsula Egypt	Egypt	32.3431	30.9569	3		52.3333	4.49	Very low	187	Optimal	23.053	Strongly saline	8.21	Moderately alkaline	Sandy clay	Amino Total	PHs	1	Foliar	0.67	1	3	5090	449.956	5320	470.288	1
918	158	Omer EA	2013		Chamomile	Others	BWh	Arid	Desert	Sinai Peninsula Egypt	Egypt	32.3431	30.9569	3		52.3333	4.49	Very low	187	Optimal	23.053	Strongly saline	8.21	Moderately alkaline	Sandy clay	Amino Total	PHs	1	Foliar	1	1	3	5090	449.956	5420	479.128	1
919	158	Omer EA	2013		Chamomile	Others	BWh	Arid	Desert	Sinai Peninsula Egypt	Egypt	32.3431	30.9569	3		52.3333	4.49	Very low	187	Optimal	23.053	Strongly saline	8.21	Moderately alkaline	Sandy clay	Amino Total	PHs	1	Foliar	0.33	1	3	29	2.5636	37.6	3.32384	2
920	158	Omer EA	2013		Chamomile	Others	BWh	Arid	Desert	Sinai Peninsula Egypt	Egypt	32.3431	30.9569	3		52.3333	4.49	Very low	187	Optimal	23.053	Strongly saline	8.21	Moderately alkaline	Sandy clay	Amino Total	PHs	1	Foliar	0.67	1	3	29	2.5636	47.1	4.16364	2
921	158	Omer EA	2013		Chamomile	Others	BWh	Arid	Desert	Sinai Peninsula Egypt	Egypt	32.3431	30.9569	3		52.3333	4.49	Very low	187	Optimal	23.053	Strongly saline	8.21	Moderately alkaline	Sandy clay	Amino Total	PHs	1	Foliar	1	1	3	29	2.5636	56.4	4.98576	2
922	158	Omer EA	2013		Chamomile	Others	BWh	Arid	Desert	Sinai Peninsula Egypt	Egypt	32.3431	30.9569	3		52.3333	4.49	Very low	187	Optimal	23.053	Strongly saline	8.21	Moderately alkaline	Sandy clay	Amino Total	PHs	1	Foliar	0.33	1	3	258.6	22.8602	287.3	25.3973	2
923	158	Omer EA	2013		Chamomile	Others	BWh	Arid	Desert	Sinai Peninsula Egypt	Egypt	32.3431	30.9569	3		52.3333	4.49	Very low	187	Optimal	23.053	Strongly saline	8.21	Moderately alkaline	Sandy clay	Amino Total	PHs	1	Foliar	0.67	1	3	258.6	22.8602	309.4	27.351	2
924	158	Omer EA	2013		Chamomile	Others	BWh	Arid	Desert	Sinai Peninsula Egypt	Egypt	32.3431	30.9569	3		52.3333	4.49	Very low	187	Optimal	23.053	Strongly saline	8.21	Moderately alkaline	Sandy clay	Amino Total	PHs	1	Foliar	1	1	3	258.6	22.8602	323	28.5532	2
925	158	Omer EA	2013		Chamomile	Others	BWh	Arid	Desert	Sinai Peninsula Egypt	Egypt	32.3431	30.9569	3		52.3333	4.49	Very low	187	Optimal	23.053	Strongly saline	8.21	Moderately alkaline	Sandy clay	Amino Total	PHs	1	Foliar	0.33	1	3	1142.2	100.97	1209.6	106.929	2
926	158	Omer EA	2013		Chamomile	Others	BWh	Arid	Desert	Sinai Peninsula Egypt	Egypt	32.3431	30.9569	3		52.3333	4.49	Very low	187	Optimal	23.053	Strongly saline	8.21	Moderately alkaline	Sandy clay	Amino Total	PHs	1	Foliar	0.67	1	3	1142.2	100.97	1265.3	111.853	2
927	158	Omer EA	2013		Chamomile	Others	BWh	Arid	Desert	Sinai Peninsula Egypt	Egypt	32.3431	30.9569	3		52.3333	4.49	Very low	187	Optimal	23.053	Strongly saline	8.21	Moderately alkaline	Sandy clay	Amino Total	PHs	1	Foliar	1	1	3	1142.2	100.97	1292	114.213	2
928	159	Shaheen, A. M.	2017		potato	Root/tuber crops	BWh	Arid	Desert	Sadat	Egypt	30.5327	30.3594	4							2.862	Slightly saline	8.2	Moderately alkaline	Sand	Amino Mix	PHs	1	Foliar	1	0	3	1.82435	0.173496	2.34235	0.222758	1
929	159	Shaheen, A. M.	2017		potato	Root/tuber crops	BWh	Arid	Desert	Sadat	Egypt	30.5327	30.3594	4							2.862	Slightly saline	8.2	Moderately alkaline	Sand	Chito-care	Chi	1	Foliar	1	0	3	1.82435	0.173496	2.1718	0.206538	1
930	159	Shaheen, A. M.	2017		potato	Root/tuber crops	BWh	Arid	Desert	Sadat	Egypt	30.5327	30.3594	4							2.862	Slightly saline	8.2	Moderately alkaline	Sand	K2Si2O2	Si	0	Foliar	1	0	3	1.82435	0.173496	2.5129	0.238977	1
931	159	Shaheen, A. M.	2017		potato	Root/tuber crops	BWh	Arid	Desert	Sadat	Egypt	30.5327	30.3594	4							2.862	Slightly saline	8.2	Moderately alkaline	Sand	Amino Mix	PHs	1	Foliar	1	0	3	1.97313	0.187644	2.58638	0.245965	2
932	159	Shaheen, A. M.	2017		potato	Root/tuber crops	BWh	Arid	Desert	Sadat	Egypt	30.5327	30.3594	4							2.862	Slightly saline	8.2	Moderately alkaline	Sand	Chito-care	Chi	1	Foliar	1	0	3	1.97313	0.187644	2.3732	0.225691	2
933	159	Shaheen, A. M.	2017		potato	Root/tuber crops	BWh	Arid	Desert	Sadat	Egypt	30.5327	30.3594	4							2.862	Slightly saline	8.2	Moderately alkaline	Sand	K2Si2O2	Si	0	Foliar	1	0	3	1.97313	0.187644	2.44396	0.23242	2
934	160	Telekalo, N.	2020	10.15159/AR.20.181	alfalfa	Others	BWh	Arid	Desert	Dokki	Egypt	31.2025	30.0395	4		34	100	Optimal	120	Medium			5.4	Moderately acid		Saprogum	HFA	1	Seed	1	0	1	0.0371946	0.000907185	0.039009	0.00181437	0
935	160	Telekalo, N.	2020	10.15159/AR.20.182	alfalfa	Others	BWh	Arid	Desert	Dokki	Egypt	31.2025	30.0395	4		34	100	Optimal	120	Medium			5.4	Moderately acid		Saprogum	HFA	1	Seed	1	0	1	0.0371946	0.000907185	0.0399161	0.000907185	0
936	160	Telekalo, N.	2020	10.15159/AR.20.183	alfalfa	Others	BWh	Arid	Desert	Dokki	Egypt	31.2025	30.0395	4		34	100	Optimal	120	Medium			5.4	Moderately acid		Saprogum	HFA	1	Seed	1	0	2	0.0371946	0.000907185	0.0399161	0.00181437	0
937	160	Telekalo, N.	2020	10.15159/AR.20.184	alfalfa	Others	BWh	Arid	Desert	Dokki	Egypt	31.2025	30.0395	4		34	100	Optimal	120	Medium			5.4	Moderately acid		Saprogum	HFA	1	Seed	1	0	1	3.10257	0.00907185	3.62874	0.0181437	0
938	160	Telekalo, N.	2020	10.15159/AR.20.185	alfalfa	Others	BWh	Arid	Desert	Dokki	Egypt	31.2025	30.0395	4		34	100	Optimal	120	Medium			5.4	Moderately acid		Saprogum	HFA	1	Seed	1	0	1	3.10257	0.00907185	3.6106	0.0272155	0
939	160	Telekalo, N.	2020	10.15159/AR.20.186	alfalfa	Others	BWh	Arid	Desert	Dokki	Egypt	31.2025	30.0395	4		34	100	Optimal	120	Medium			5.4	Moderately acid		Saprogum	HFA	1	Seed	1	0	2	3.10257	0.00907185	3.66503	0.0272155	0
940	161	Al-Bayati, Ammar	2020		eggplant	Vegetables	BWh	Arid	Desert	Al-Abbasiyah	Iraq	38.4331	34.4	3		4.32	3.77	Very low			4.6737	Moderately saline			Sandy loam	Tecamin Algae	SWE	1	Foliar	0.5	1	2	1.09588	0.105972	1.21472	0.117463	0
941	161	Al-Bayati, Ammar	2020		eggplant	Vegetables	BWh	Arid	Desert	Al-Abbasiyah	Iraq	38.4331	34.4	3		4.32	3.77	Very low			4.6737	Moderately saline			Sandy loam	Tecamin Algae	SWE	1	Foliar	1	1	2	1.09588	0.105972	1.34263	0.129833	0
942	162	Godlewska, A	2020		red clover	Others	Dfb	Boreal	Fully humid	Siedlce	Poland	22.2902	52.1676	3	0.13				114	Medium			7.92845	Moderately alkaline	Sandy loam	Algex	SWE	1	Foliar	1	0	3	1.39	0.122876	2.51	0.221884	1
943	162	Godlewska, A	2020		red clover	Others	Dfb	Boreal	Fully humid	Siedlce	Poland	22.2902	52.1676	3	0.13				114	Medium			7.92845	Moderately alkaline	Sandy loam	Algex	SWE	1	Foliar	1	0	3	0.7	0.06188	1.14	0.100776	2
944	163	Godlewska, Katarzyna	2020	10.3390/molecules25184212	celery	Vegetables	Cfb	Warm temperate	Fully humid	Psary	Poland	17.9228	50.603	3			24.5	Low	118.7	Medium	0.397722	Nonsaline	7.36			St.John's wort	PE	0	Foliar	1	0	3	1.867	0.391	1.79	0.301	0
945	163	Godlewska, Katarzyna	2020	10.3390/molecules25184213	celery	Vegetables	Cfb	Warm temperate	Fully humid	Psary	Poland	17.9228	50.603	3			24.5	Low	118.7	Medium	0.397722	Nonsaline	7.36			St.John's wort	PE	0	Foliar	1	0	3	1.867	0.391	3.27	0.653	0
946	163	Godlewska, Katarzyna	2020	10.3390/molecules25184214	celery	Vegetables	Cfb	Warm temperate	Fully humid	Psary	Poland	17.9228	50.603	3			24.5	Low	118.7	Medium	0.397722	Nonsaline	7.36			giant goldenrod leaf	PE	0	Foliar	1	0	3	1.867	0.391	2.49	0.552	0
947	163	Godlewska, Katarzyna	2020	10.3390/molecules25184215	celery	Vegetables	Cfb	Warm temperate	Fully humid	Psary	Poland	17.9228	50.603	3			24.5	Low	118.7	Medium	0.397722	Nonsaline	7.36			giant goldenrod leaf	PE	0	Foliar	1	0	3	1.867	0.391	1.524	0.134	0
948	163	Godlewska, Katarzyna	2020	10.3390/molecules25184216	celery	Vegetables	Cfb	Warm temperate	Fully humid	Psary	Poland	17.9228	50.603	3			24.5	Low	118.7	Medium	0.397722	Nonsaline	7.36			common dandeloin flower	PE	0	Foliar	1	0	3	1.867	0.391	2.046	0.228	0
949	163	Godlewska, Katarzyna	2020	10.3390/molecules25184217	celery	Vegetables	Cfb	Warm temperate	Fully humid	Psary	Poland	17.9228	50.603	3			24.5	Low	118.7	Medium	0.397722	Nonsaline	7.36			common dandeloin flower	PE	0	Foliar	1	0	3	1.867	0.391	2.242	0.402	0
950	163	Godlewska, Katarzyna	2020	10.3390/molecules25184218	celery	Vegetables	Cfb	Warm temperate	Fully humid	Psary	Poland	17.9228	50.603	3			24.5	Low	118.7	Medium	0.397722	Nonsaline	7.36			common dandeloin leaf	PE	0	Foliar	1	0	3	1.867	0.391	2.141	0.42	0
951	163	Godlewska, Katarzyna	2020	10.3390/molecules25184219	celery	Vegetables	Cfb	Warm temperate	Fully humid	Psary	Poland	17.9228	50.603	3			24.5	Low	118.7	Medium	0.397722	Nonsaline	7.36			common dandeloin leaf	PE	0	Foliar	1	0	3	1.867	0.391	3.087	0.617	0
952	163	Godlewska, Katarzyna	2020	10.3390/molecules25184220	celery	Vegetables	Cfb	Warm temperate	Fully humid	Psary	Poland	17.9228	50.603	3			24.5	Low	118.7	Medium	0.397722	Nonsaline	7.36			red clover leaf	PE	0	Foliar	1	0	3	1.867	0.391	1.527	0.281	0
953	163	Godlewska, Katarzyna	2020	10.3390/molecules25184221	celery	Vegetables	Cfb	Warm temperate	Fully humid	Psary	Poland	17.9228	50.603	3			24.5	Low	118.7	Medium	0.397722	Nonsaline	7.36			red clover leaf	PE	0	Foliar	1	0	3	1.867	0.391	2.494	0.423	0
954	163	Godlewska, Katarzyna	2020	10.3390/molecules25184222	celery	Vegetables	Cfb	Warm temperate	Fully humid	Psary	Poland	17.9228	50.603	3			24.5	Low	118.7	Medium	0.397722	Nonsaline	7.36			nettle leaf	PE	0	Foliar	1	0	3	1.867	0.391	1.36	0.262	0
955	163	Godlewska, Katarzyna	2020	10.3390/molecules25184223	celery	Vegetables	Cfb	Warm temperate	Fully humid	Psary	Poland	17.9228	50.603	3			24.5	Low	118.7	Medium	0.397722	Nonsaline	7.36			nettle leaf	PE	0	Foliar	1	0	3	1.867	0.391	2.24	0.298	0
956	163	Godlewska, Katarzyna	2020	10.3390/molecules25184224	celery	Vegetables	Cfb	Warm temperate	Fully humid	Psary	Poland	17.9228	50.603	3			24.5	Low	118.7	Medium	0.397722	Nonsaline	7.36			velarian root	PE	0	Foliar	1	0	3	1.867	0.391	2.066	0.235	0
957	163	Godlewska, Katarzyna	2020	10.3390/molecules25184225	celery	Vegetables	Cfb	Warm temperate	Fully humid	Psary	Poland	17.9228	50.603	3			24.5	Low	118.7	Medium	0.397722	Nonsaline	7.36			velarian root	PE	0	Foliar	1	0	3	1.867	0.391	1.307	0.224	0
958	164	Castellano-Hinojosa, A	2021	10.1007/s00468-021-02133-8	citrus	Fruits	Cfa	Warm temperate	Fully humid	Hendry County	USA	-81.17	26.55	6											Sand	Stimplex	HFA	1	Foliar	1	0	continuous	1.58295	0.177291	1.33562	0.149589	1
959	164	Castellano-Hinojosa, A	2021	10.1007/s00468-021-02133-9	citrus	Fruits	Cfa	Warm temperate	Fully humid	Hendry County	USA	-81.17	26.55	6											Sand	Fetri-organic	SWE	1	Foliar	1	0	continuous	1.58295	0.177291	1.60959	0.180274	1
960	164	Castellano-Hinojosa, A	2021	10.1007/s00468-021-02133-10	citrus	Fruits	Cfa	Warm temperate	Fully humid	Hendry County	USA	-81.17	26.55	6											Sand	Stimplex	HFA	1	Foliar	1	0	continuous	2.75114	0.308128	2.71689	0.304292	2
961	164	Castellano-Hinojosa, A	2021	10.1007/s00468-021-02133-11	citrus	Fruits	Cfa	Warm temperate	Fully humid	Hendry County	USA	-81.17	26.55	6											Sand	Fetri-organic	SWE	1	Foliar	1	0	continuous	2.75114	0.308128	2.8691	0.321339	2
962	164	Castellano-Hinojosa, A	2021	10.1007/s00468-021-02133-12	citrus	Fruits	Cfa	Warm temperate	Fully humid	Hendry County	USA	-81.17	26.55	6											Sand	Stimplex	HFA	1	Foliar	1	0	continuous	0.749619	0.0839574	0.696347	0.0779909	0
963	164	Castellano-Hinojosa, A	2021	10.1007/s00468-021-02133-13	citrus	Fruits	Cfa	Warm temperate	Fully humid	Hendry County	USA	-81.17	26.55	6											Sand	Fetri-organic	SWE	1	Foliar	1	0	continuous	0.749619	0.0839574	0.692542	0.0775647	0
964	165	Kocira, Sławomir	2020	10.3390/agronomy1009133	bean	Legumes	Dfb	Boreal	Fully humid	Perespa	Poland	23.636	50.657	4		81	55	Optimal	127	Medium			8.5783	Strongly alkaline		Kelpak	SWE	1	Foliar	0.7	1	1	0.2479	0.0332186	0.3203	0.0429202	1
965	165	Kocira, Sławomir	2020	10.3390/agronomy1009134	bean	Legumes	Dfb	Boreal	Fully humid	Perespa	Poland	23.636	50.657	4		81	55	Optimal	127	Medium			8.5783	Strongly alkaline		Kelpak	SWE	1	Foliar	1	1	1	0.2479	0.0332186	0.3225	0.043215	1
966	165	Kocira, Sławomir	2020	10.3390/agronomy1009135	bean	Legumes	Dfb	Boreal	Fully humid	Perespa	Poland	23.636	50.657	4		81	55	Optimal	127	Medium			8.5783	Strongly alkaline		Kelpak	SWE	1	Foliar	0.7	1	2	0.2479	0.0332186	0.3302	0.0442468	1
967	165	Kocira, Sławomir	2020	10.3390/agronomy1009136	bean	Legumes	Dfb	Boreal	Fully humid	Perespa	Poland	23.636	50.657	4		81	55	Optimal	127	Medium			8.5783	Strongly alkaline		Kelpak	SWE	1	Foliar	1	1	2	0.2479	0.0332186	0.3386	0.0453724	1
968	165	Kocira, Sławomir	2020	10.3390/agronomy1009137	bean	Legumes	Dfb	Boreal	Fully humid	Perespa	Poland	23.636	50.657	4		81	55	Optimal	127	Medium			8.5783	Strongly alkaline		Kelpak	SWE	1	Foliar	0.7	1	1	0.2784	0.0373056	0.3599	0.0482266	2
969	165	Kocira, Sławomir	2020	10.3390/agronomy1009138	bean	Legumes	Dfb	Boreal	Fully humid	Perespa	Poland	23.636	50.657	4		81	55	Optimal	127	Medium			8.5783	Strongly alkaline		Kelpak	SWE	1	Foliar	1	1	1	0.2784	0.0373056	0.3192	0.0427728	2
970	165	Kocira, Sławomir	2020	10.3390/agronomy1009139	bean	Legumes	Dfb	Boreal	Fully humid	Perespa	Poland	23.636	50.657	4		81	55	Optimal	127	Medium			8.5783	Strongly alkaline		Kelpak	SWE	1	Foliar	0.7	1	2	0.2784	0.0373056	0.3307	0.0443138	2
971	165	Kocira, Sławomir	2020	10.3390/agronomy1009140	bean	Legumes	Dfb	Boreal	Fully humid	Perespa	Poland	23.636	50.657	4		81	55	Optimal	127	Medium			8.5783	Strongly alkaline		Kelpak	SWE	1	Foliar	1	1	2	0.2784	0.0373056	0.3701	0.0495934	2
972	165	Kocira, Sławomir	2020	10.3390/agronomy1009141	bean	Legumes	Dfb	Boreal	Fully humid	Perespa	Poland	23.636	50.657	4		81	55	Optimal	127	Medium			8.5783	Strongly alkaline		Kelpak	SWE	1	Foliar	0.7	1	1	0.3162	0.0423708	0.3939	0.0527826	3
973	165	Kocira, Sławomir	2020	10.3390/agronomy1009142	bean	Legumes	Dfb	Boreal	Fully humid	Perespa	Poland	23.636	50.657	4		81	55	Optimal	127	Medium			8.5783	Strongly alkaline		Kelpak	SWE	1	Foliar	1	1	1	0.3162	0.0423708	0.3343	0.0447962	3
974	165	Kocira, Sławomir	2020	10.3390/agronomy1009143	bean	Legumes	Dfb	Boreal	Fully humid	Perespa	Poland	23.636	50.657	4		81	55	Optimal	127	Medium			8.5783	Strongly alkaline		Kelpak	SWE	1	Foliar	0.7	1	2	0.3162	0.0423708	0.4119	0.0551946	3
975	165	Kocira, Sławomir	2020	10.3390/agronomy1009144	bean	Legumes	Dfb	Boreal	Fully humid	Perespa	Poland	23.636	50.657	4		81	55	Optimal	127	Medium			8.5783	Strongly alkaline		Kelpak	SWE	1	Foliar	1	1	2	0.3162	0.0423708	0.4039	0.0541226	3
976	165	Kocira, Sławomir	2020	10.3390/agronomy1009145	bean	Legumes	Dfb	Boreal	Fully humid	Perespa	Poland	23.636	50.657	4		81	55	Optimal	127	Medium			8.5783	Strongly alkaline		Terra Sorb Complex	PHs	1	Foliar	0.6	1	1	0.2479	0.0332186	0.258	0.034572	1
977	165	Kocira, Sławomir	2020	10.3390/agronomy1009146	bean	Legumes	Dfb	Boreal	Fully humid	Perespa	Poland	23.636	50.657	4		81	55	Optimal	127	Medium			8.5783	Strongly alkaline		Terra Sorb Complex	PHs	1	Foliar	1	1	1	0.2479	0.0332186	0.2667	0.0357378	1
978	165	Kocira, Sławomir	2020	10.3390/agronomy1009147	bean	Legumes	Dfb	Boreal	Fully humid	Perespa	Poland	23.636	50.657	4		81	55	Optimal	127	Medium			8.5783	Strongly alkaline		Terra Sorb Complex	PHs	1	Foliar	0.6	1	2	0.2479	0.0332186	0.2841	0.0380694	1
979	165	Kocira, Sławomir	2020	10.3390/agronomy1009148	bean	Legumes	Dfb	Boreal	Fully humid	Perespa	Poland	23.636	50.657	4		81	55	Optimal	127	Medium			8.5783	Strongly alkaline		Terra Sorb Complex	PHs	1	Foliar	1	1	2	0.2479	0.0332186	0.2578	0.0345452	1
980	165	Kocira, Sławomir	2020	10.3390/agronomy1009149	bean	Legumes	Dfb	Boreal	Fully humid	Perespa	Poland	23.636	50.657	4		81	55	Optimal	127	Medium			8.5783	Strongly alkaline		Terra Sorb Complex	PHs	1	Foliar	0.6	1	1	0.2784	0.0373056	0.3298	0.0441932	2
981	165	Kocira, Sławomir	2020	10.3390/agronomy1009150	bean	Legumes	Dfb	Boreal	Fully humid	Perespa	Poland	23.636	50.657	4		81	55	Optimal	127	Medium			8.5783	Strongly alkaline		Terra Sorb Complex	PHs	1	Foliar	1	1	1	0.2784	0.0373056	0.3936	0.0527424	2
982	165	Kocira, Sławomir	2020	10.3390/agronomy1009151	bean	Legumes	Dfb	Boreal	Fully humid	Perespa	Poland	23.636	50.657	4		81	55	Optimal	127	Medium			8.5783	Strongly alkaline		Terra Sorb Complex	PHs	1	Foliar	0.6	1	2	0.2784	0.0373056	0.3811	0.0510674	2
983	165	Kocira, Sławomir	2020	10.3390/agronomy1009152	bean	Legumes	Dfb	Boreal	Fully humid	Perespa	Poland	23.636	50.657	4		81	55	Optimal	127	Medium			8.5783	Strongly alkaline		Terra Sorb Complex	PHs	1	Foliar	1	1	2	0.2784	0.0373056	0.3345	0.044823	2
984	165	Kocira, Sławomir	2020	10.3390/agronomy1009153	bean	Legumes	Dfb	Boreal	Fully humid	Perespa	Poland	23.636	50.657	4		81	55	Optimal	127	Medium			8.5783	Strongly alkaline		Terra Sorb Complex	PHs	1	Foliar	0.6	1	1	0.3162	0.0423708	0.3408	0.0456672	3
985	165	Kocira, Sławomir	2020	10.3390/agronomy1009154	bean	Legumes	Dfb	Boreal	Fully humid	Perespa	Poland	23.636	50.657	4		81	55	Optimal	127	Medium			8.5783	Strongly alkaline		Terra Sorb Complex	PHs	1	Foliar	1	1	1	0.3162	0.0423708	0.3582	0.0479988	3
986	165	Kocira, Sławomir	2020	10.3390/agronomy1009155	bean	Legumes	Dfb	Boreal	Fully humid	Perespa	Poland	23.636	50.657	4		81	55	Optimal	127	Medium			8.5783	Strongly alkaline		Terra Sorb Complex	PHs	1	Foliar	0.6	1	2	0.3162	0.0423708	0.3624	0.0485616	3
987	165	Kocira, Sławomir	2020	10.3390/agronomy1009156	bean	Legumes	Dfb	Boreal	Fully humid	Perespa	Poland	23.636	50.657	4		81	55	Optimal	127	Medium			8.5783	Strongly alkaline		Terra Sorb Complex	PHs	1	Foliar	1	1	2	0.3162	0.0423708	0.3406	0.0456404	3
988	166	Maswada, H. F.	2018	10.1080/03650340.2017.1406079	maize	Cereals	BWh	Arid	Desert	Dokki	Egypt	31.2025	30.0395	4		32.4	8.3	Very low	158.7	Optimal	2.81	Slightly saline	7.64	Moderately alkaline	Clay loam	MLE	PE	0	Foliar	1	0	2	9.5	0.40375	11.6	0.493	1
989	166	Maswada, H. F.	2018	10.1080/03650340.2017.1406080	maize	Cereals	BWh	Arid	Desert	Dokki	Egypt	31.2025	30.0395	4		32.4	8.3	Very low	158.7	Optimal	2.81	Slightly saline	7.64	Moderately alkaline	Clay loam	MLE	PE	0	Foliar	1	0	2	8.8	0.374	10.9	0.46325	2
990	167	Merwad, Arma	2017	10.1080/01904167.2016.1263318	wheat	Cereals	BWh	Arid	Desert	Salhia	Egypt	31.862	30.642	3		65.23	5.13	Very low	70.95	Low	1.9836	Nonsaline	7.93	Moderately alkaline	Sand	MLE	PE	0	Foliar	0.25	1	3	0.661	0.0280925	0.731	0.0310675	1
991	167	Merwad, Arma	2017	10.1080/01904167.2016.1263319	wheat	Cereals	BWh	Arid	Desert	Salhia	Egypt	31.862	30.642	3		65.23	5.13	Very low	70.95	Low	1.9836	Nonsaline	7.93	Moderately alkaline	Sand	MLE	PE	0	Foliar	0.5	1	3	0.661	0.0280925	0.799	0.0339575	1
992	167	Merwad, Arma	2017	10.1080/01904167.2016.1263320	wheat	Cereals	BWh	Arid	Desert	Salhia	Egypt	31.862	30.642	3		65.23	5.13	Very low	70.95	Low	1.9836	Nonsaline	7.93	Moderately alkaline	Sand	MLE	PE	0	Foliar	0.75	1	3	0.661	0.0280925	0.898	0.038165	1
993	167	Merwad, Arma	2017	10.1080/01904167.2016.1263321	wheat	Cereals	BWh	Arid	Desert	Salhia	Egypt	31.862	30.642	3		65.23	5.13	Very low	70.95	Low	1.9836	Nonsaline	7.93	Moderately alkaline	Sand	MLE	PE	0	Foliar	1	1	3	0.661	0.0280925	1.132	0.04811	1
994	167	Merwad, Arma	2017	10.1080/01904167.2016.1263322	wheat	Cereals	BWh	Arid	Desert	Salhia	Egypt	31.862	30.642	3		65.23	5.13	Very low	70.95	Low	1.9836	Nonsaline	7.93	Moderately alkaline	Sand	MLE	PE	0	Foliar	0.25	1	3	0.588	0.02499	0.72	0.0306	2
995	167	Merwad, Arma	2017	10.1080/01904167.2016.1263323	wheat	Cereals	BWh	Arid	Desert	Salhia	Egypt	31.862	30.642	3		65.23	5.13	Very low	70.95	Low	1.9836	Nonsaline	7.93	Moderately alkaline	Sand	MLE	PE	0	Foliar	0.5	1	3	0.588	0.02499	0.796	0.03383	2
996	167	Merwad, Arma	2017	10.1080/01904167.2016.1263324	wheat	Cereals	BWh	Arid	Desert	Salhia	Egypt	31.862	30.642	3		65.23	5.13	Very low	70.95	Low	1.9836	Nonsaline	7.93	Moderately alkaline	Sand	MLE	PE	0	Foliar	0.75	1	3	0.588	0.02499	0.894	0.037995	2
997	167	Merwad, Arma	2017	10.1080/01904167.2016.1263325	wheat	Cereals	BWh	Arid	Desert	Salhia	Egypt	31.862	30.642	3		65.23	5.13	Very low	70.95	Low	1.9836	Nonsaline	7.93	Moderately alkaline	Sand	MLE	PE	0	Foliar	1	1	3	0.588	0.02499	1.111	0.0472175	2
998	168	Rashid, Nabila	2020	10.1111/jac.12482	quinoa	Cereals	BSh	Arid	Steppe	Faisalabad	Pakistan	73.135	31.4504	4											Clay loam	Sorghum	PE	0	Foliar	1	0	1	0.01342	0.00057035	0.02354	0.00100045	1
999	168	Rashid, Nabila	2020	10.1111/jac.12483	quinoa	Cereals	BSh	Arid	Steppe	Faisalabad	Pakistan	73.135	31.4504	4											Clay loam	Sorghum	PE	0	Foliar	1	0	1	0.01342	0.00057035	0.02376	0.0010098	1
1000	168	Rashid, Nabila	2020	10.1111/jac.12484	quinoa	Cereals	BSh	Arid	Steppe	Faisalabad	Pakistan	73.135	31.4504	4											Clay loam	MLE	PE	0	Foliar	1	0	1	0.00682	0.00028985	0.0121	0.00051425	1
1001	168	Rashid, Nabila	2020	10.1111/jac.12485	quinoa	Cereals	BSh	Arid	Steppe	Faisalabad	Pakistan	73.135	31.4504	4											Clay loam	MLE	PE	0	Foliar	1	0	1	0.00682	0.00028985	0.01232	0.0005236	1
1002	168	Rashid, Nabila	2020	10.1111/jac.12486	quinoa	Cereals	BSh	Arid	Steppe	Faisalabad	Pakistan	73.135	31.4504	4											Clay loam	Sorghum	PE	0	Foliar	1	0	1	0.01518	0.00064515	0.02354	0.00100045	2
1003	168	Rashid, Nabila	2020	10.1111/jac.12487	quinoa	Cereals	BSh	Arid	Steppe	Faisalabad	Pakistan	73.135	31.4504	4											Clay loam	Sorghum	PE	0	Foliar	1	0	1	0.01518	0.00064515	0.02354	0.00100045	2
1004	168	Rashid, Nabila	2020	10.1111/jac.12488	quinoa	Cereals	BSh	Arid	Steppe	Faisalabad	Pakistan	73.135	31.4504	4											Clay loam	MLE	PE	0	Foliar	1	0	1	0.00638	0.00027115	0.011	0.0004675	2
1005	168	Rashid, Nabila	2020	10.1111/jac.12489	quinoa	Cereals	BSh	Arid	Steppe	Faisalabad	Pakistan	73.135	31.4504	4											Clay loam	MLE	PE	0	Foliar	1	0	1	0.00638	0.00027115	0.01166	0.00049555	2
1006	169	Stamatiadis,	2021	10.1007/s10811-021-02417-z	wheat	Cereals	Csa	Warm temperate	Summer dry	Nea Lefk	Greece	20.705	38.8308	3	0.12		7.54	Very low	312	Optimal			8.1	Moderately alkaline	Clay loam	Le Jol.	SWE	1	Foliar	1	0	1	0.343	0.0145775	0.4668	0.019839	1
1007	169	Stamatiadis,	2021	10.1007/s10811-021-02417-z	wheat	Cereals	Csa	Warm temperate	Summer dry	Nea Lefk	Greece	20.705	38.8308	3	0.12		7.54	Very low	312	Optimal			8.1	Moderately alkaline	Clay loam	Le Jol.	SWE	1	Foliar	1	0	1	0.343	0.0145775	0.387	0.0164475	1
1008	169	Stamatiadis,	2021	10.1007/s10811-021-02417-z	wheat	Cereals	Csa	Warm temperate	Summer dry	Nea Lefk	Greece	20.705	38.8308	3	0.12		7.54	Very low	312	Optimal			8.1	Moderately alkaline	Clay loam	Le Jol.	SWE	1	Foliar	1	0	1	0.343	0.0145775	0.3433	0.0145903	1
1009	169	Stamatiadis,	2021	10.1007/s10811-021-02417-z	wheat	Cereals	Csa	Warm temperate	Summer dry	Nea Lefk	Greece	20.705	38.8308	3	0.12		7.54	Very low	312	Optimal			8.1	Moderately alkaline	Clay loam	Le Jol.	SWE	1	Foliar	1	0	1	0.343	0.0145775	0.3535	0.0150238	1
1010	169	Stamatiadis,	2021	10.1007/s10811-021-02417-z	wheat	Cereals	Csa	Warm temperate	Summer dry	Nea Lefk	Greece	20.705	38.8308	3	0.12		7.54	Very low	312	Optimal			8.1	Moderately alkaline	Clay loam	Le Jol.	SWE	1	Foliar	1	0	1	0.343	0.0145775	0.3278	0.0139315	1
1011	169	Stamatiadis,	2021	10.1007/s10811-021-02417-z	wheat	Cereals	Csa	Warm temperate	Summer dry	Nea Lefk	Greece	20.705	38.8308	3	0.14		4.5	Very low	507	Optimal			7.9	Moderately alkaline	Clay loam	Le Jol.	SWE	1	Foliar	1	0	1	0.4433	0.0188403	0.5129	0.0217983	2
1012	169	Stamatiadis,	2021	10.1007/s10811-021-02417-z	wheat	Cereals	Csa	Warm temperate	Summer dry	Nea Lefk	Greece	20.705	38.8308	3	0.14		4.5	Very low	507	Optimal			7.9	Moderately alkaline	Clay loam	Le Jol.	SWE	1	Foliar	1	0	1	0.4433	0.0188403	0.5153	0.0219002	2
1013	169	Stamatiadis,	2021	10.1007/s10811-021-02417-z	wheat	Cereals	Csa	Warm temperate	Summer dry	Nea Lefk	Greece	20.705	38.8308	3	0.14		4.5	Very low	507	Optimal			7.9	Moderately alkaline	Clay loam	Le Jol.	SWE	1	Foliar	1	0	1	0.4433	0.0188403	0.5389	0.0229033	2
1014	169	Stamatiadis,	2021	10.1007/s10811-021-02417-z	wheat	Cereals	Csa	Warm temperate	Summer dry	Nea Lefk	Greece	20.705	38.8308	3	0.14		4.5	Very low	507	Optimal			7.9	Moderately alkaline	Clay loam	Le Jol.	SWE	1	Foliar	1	0	1	0.4433	0.0188403	0.4781	0.0203193	2
1015	169	Stamatiadis,	2021	10.1007/s10811-021-02417-z	wheat	Cereals	Csa	Warm temperate	Summer dry	Nea Lefk	Greece	20.705	38.8308	3	0.14		4.5	Very low	507	Optimal			7.9	Moderately alkaline	Clay loam	Le Jol.	SWE	1	Foliar	1	0	1	0.4433	0.0188403	0.451	0.0191675	2
1016	169	Stamatiadis,	2021	10.1007/s10811-021-02417-z	wheat	Cereals	Csa	Warm temperate	Summer dry	Nea Lefk	Greece	20.705	38.8308	3	0.13		14.5	Very low	402	Optimal			8.3	Moderately alkaline	Clay	Le Jol.	SWE	1	Foliar	1	0	1	0.3623	0.0153978	0.368	0.01564	3
1017	169	Stamatiadis,	2021	10.1007/s10811-021-02417-z	wheat	Cereals	Csa	Warm temperate	Summer dry	Nea Lefk	Greece	20.705	38.8308	3	0.13		14.5	Very low	402	Optimal			8.3	Moderately alkaline	Clay	Le Jol.	SWE	1	Foliar	1	0	1	0.3623	0.0153978	0.4133	0.0175653	3
1018	169	Stamatiadis,	2021	10.1007/s10811-021-02417-z	wheat	Cereals	Csa	Warm temperate	Summer dry	Nea Lefk	Greece	20.705	38.8308	3	0.13		14.5	Very low	402	Optimal			8.3	Moderately alkaline	Clay	Le Jol.	SWE	1	Foliar	1	0	1	0.3623	0.0153978	0.3965	0.0168513	3
1019	169	Stamatiadis,	2021	10.1007/s10811-021-02417-z	wheat	Cereals	Csa	Warm temperate	Summer dry	Nea Lefk	Greece	20.705	38.8308	3	0.13		14.5	Very low	402	Optimal			8.3	Moderately alkaline	Clay	Le Jol.	SWE	1	Foliar	1	0	1	0.3623	0.0153978	0.3978	0.0169065	3
1020	169	Stamatiadis,	2021	10.1007/s10811-021-02417-z	wheat	Cereals	Csa	Warm temperate	Summer dry	Nea Lefk	Greece	20.705	38.8308	3	0.13		14.5	Very low	402	Optimal			8.3	Moderately alkaline	Clay	Le Jol.	SWE	1	Foliar	1	0	1	0.3623	0.0153978	0.3935	0.0167238	3
1021	170	Chen,Diwen	2021	10.3389/fpls.2021.659130	sugarcane	Fruits	Cwa	Warm temperate	Winter dry	Suixi	China	110.28	21.35	4	0.092		65.35		140.13								SWE	0	Foliar	1	0	1	106.3	17.5395	107.69	17.7689	1
1022	170	Chen,Diwen	2021	10.3389/fpls.2021.659131	sugarcane	Fruits	Cwa	Warm temperate	Winter dry	Suixi	China	110.28	21.35	4	0.092		65.35		140.13								SWE	0	Foliar	1	0	2	106.3	17.5395	115.19	19.0064	1
1023	170	Chen,Diwen	2021	10.3389/fpls.2021.659132	sugarcane	Fruits	Cwa	Warm temperate	Winter dry	Suixi	China	110.28	21.35	4	0.092		65.35		140.13								SWE	0	Foliar	1	0	3	106.3	17.5395	115.7	19.0905	1
1024	170	Chen,Diwen	2021	10.3389/fpls.2021.659133	sugarcane	Fruits	Cwa	Warm temperate	Winter dry	Suixi	China	110.28	21.35	4	0.092		65.35		140.13								SWE	0	Foliar	1	0	1	106.3	17.5395	107.21	17.6897	1
1025	170	Chen,Diwen	2021	10.3389/fpls.2021.659134	sugarcane	Fruits	Cwa	Warm temperate	Winter dry	Suixi	China	110.28	21.35	4	0.092		65.35		140.13								SWE	0	Foliar	1	0	1	103.88	17.1402	107.97	17.815	2
1026	170	Chen,Diwen	2021	10.3389/fpls.2021.659135	sugarcane	Fruits	Cwa	Warm temperate	Winter dry	Suixi	China	110.28	21.35	4	0.092		65.35		140.13								SWE	0	Foliar	1	0	2	103.88	17.1402	113.45	18.7193	2
1027	170	Chen,Diwen	2021	10.3389/fpls.2021.659136	sugarcane	Fruits	Cwa	Warm temperate	Winter dry	Suixi	China	110.28	21.35	4	0.092		65.35		140.13								SWE	0	Foliar	1	0	3	103.88	17.1402	111.19	18.3464	2
1028	170	Chen,Diwen	2021	10.3389/fpls.2021.659137	sugarcane	Fruits	Cwa	Warm temperate	Winter dry	Suixi	China	110.28	21.35	4	0.092		65.35		140.13								SWE	0	Foliar	1	0	1	103.88	17.1402	104.73	17.2805	2
1029	170	Chen,Diwen	2021	10.3389/fpls.2021.659138	sugarcane	Fruits	Cwa	Warm temperate	Winter dry	Suixi	China	110.28	21.35	4	0.092		65.35		140.13								SWE	0	Foliar	1	0	1	89.44	14.7576	91.96	15.1734	3
1030	170	Chen,Diwen	2021	10.3389/fpls.2021.659139	sugarcane	Fruits	Cwa	Warm temperate	Winter dry	Suixi	China	110.28	21.35	4	0.092		65.35		140.13								SWE	0	Foliar	1	0	2	89.44	14.7576	98.46	16.2459	3
1031	170	Chen,Diwen	2021	10.3389/fpls.2021.659140	sugarcane	Fruits	Cwa	Warm temperate	Winter dry	Suixi	China	110.28	21.35	4	0.092		65.35		140.13								SWE	0	Foliar	1	0	3	89.44	14.7576	98.84	16.3086	3
1032	170	Chen,Diwen	2021	10.3389/fpls.2021.659141	sugarcane	Fruits	Cwa	Warm temperate	Winter dry	Suixi	China	110.28	21.35	4	0.092		65.35		140.13								SWE	0	Foliar	1	0	1	89.44	14.7576	90.19	14.8814	3
1033	170	Chen,Diwen	2021	10.3389/fpls.2021.659142	sugarcane	Fruits	Cfa	Warm temperate	Fully humid	Wenyuan	China	113.94	24.27	4	0.117		21.93		66.83								SWE	0	Foliar	1	0	1	95.6	15.774	98.84	16.3086	1
1034	170	Chen,Diwen	2021	10.3389/fpls.2021.659143	sugarcane	Fruits	Cfa	Warm temperate	Fully humid	Wenyuan	China	113.94	24.27	4	0.117		21.93		66.83								SWE	0	Foliar	1	0	2	95.6	15.774	104.45	17.2343	1
1035	170	Chen,Diwen	2021	10.3389/fpls.2021.659144	sugarcane	Fruits	Cfa	Warm temperate	Fully humid	Wenyuan	China	113.94	24.27	4	0.117		21.93		66.83								SWE	0	Foliar	1	0	3	95.6	15.774	105.29	17.3729	1
1036	170	Chen,Diwen	2021	10.3389/fpls.2021.659145	sugarcane	Fruits	Cfa	Warm temperate	Fully humid	Wenyuan	China	113.94	24.27	4	0.117		21.93		66.83								SWE	0	Foliar	1	0	1	95.6	15.774	99.07	16.3466	1
1037	170	Chen,Diwen	2021	10.3389/fpls.2021.659146	sugarcane	Fruits	Cfa	Warm temperate	Fully humid	Wenyuan	China	113.94	24.27	4	0.117		21.93		66.83								SWE	0	Foliar	1	0	1	100.62	16.6023	106.86	17.6319	2
1038	170	Chen,Diwen	2021	10.3389/fpls.2021.659147	sugarcane	Fruits	Cfa	Warm temperate	Fully humid	Wenyuan	China	113.94	24.27	4	0.117		21.93		66.83								SWE	0	Foliar	1	0	2	100.62	16.6023	111.94	18.4701	2
1039	170	Chen,Diwen	2021	10.3389/fpls.2021.659148	sugarcane	Fruits	Cfa	Warm temperate	Fully humid	Wenyuan	China	113.94	24.27	4	0.117		21.93		66.83								SWE	0	Foliar	1	0	3	100.62	16.6023	112.36	18.5394	2
1040	170	Chen,Diwen	2021	10.3389/fpls.2021.659149	sugarcane	Fruits	Cfa	Warm temperate	Fully humid	Wenyuan	China	113.94	24.27	4	0.117		21.93		66.83								SWE	0	Foliar	1	0	1	100.62	16.6023	102.82	16.9653	2
1041	170	Chen,Diwen	2021	10.3389/fpls.2021.659150	sugarcane	Fruits	Cfa	Warm temperate	Fully humid	Wenyuan	China	113.94	24.27	4	0.117		21.93		66.83								SWE	0	Foliar	1	0	1	85.54	14.1141	87.44	14.4276	3
1042	170	Chen,Diwen	2021	10.3389/fpls.2021.659151	sugarcane	Fruits	Cfa	Warm temperate	Fully humid	Wenyuan	China	113.94	24.27	4	0.117		21.93		66.83								SWE	0	Foliar	1	0	2	85.54	14.1141	90.24	14.8896	3
1043	170	Chen,Diwen	2021	10.3389/fpls.2021.659152	sugarcane	Fruits	Cfa	Warm temperate	Fully humid	Wenyuan	China	113.94	24.27	4	0.117		21.93		66.83								SWE	0	Foliar	1	0	3	85.54	14.1141	90.97	15.01	3
1044	170	Chen,Diwen	2021	10.3389/fpls.2021.659153	sugarcane	Fruits	Cfa	Warm temperate	Fully humid	Wenyuan	China	113.94	24.27	4	0.117		21.93		66.83								SWE	0	Foliar	1	0	1	85.54	14.1141	86.54	14.2791	3
1045	171	Di-Vaio, Claudio	2021	10.3390/agronomy11040715	apple	Fruits	Csa	Warm temperate	Summer dry	Vitulazio	Italy	14.2169	41.1641	4												Peptone 85/16	PHs	1	Foliar	1	0	4	221.269	7.35989	277.65	13.3018	0
1046	171	Di-Vaio, Claudio	2021	10.3390/agronomy11040716	apple	Fruits	Csa	Warm temperate	Summer dry	Vitulazio	Italy	14.2169	41.1641	4												ZINC 10 LG S	SWE	1	Foliar	1	0	4	221.269	7.35989	217.758	8.57529	0
1047	171	Di-Vaio, Claudio	2021	10.3390/agronomy11040717	apple	Fruits	Csa	Warm temperate	Summer dry	Vitulazio	Italy	14.2169	41.1641	4												AgriAlgae	SWE	1	Foliar	1	0	4	221.269	7.35989	8.57529	12.9642	0
1048	172	Petoumenou, D. G.	2021	10.3390/plants10050906	grape	Fruits	Csa	Warm temperate	Summer dry	Karitsa	Greece	22.7627	39.8431	3											Loam	Kelpak	SWE	1	Foliar	1	0	2	1.55484	0.256548	1.62742	0.268524	0
1049	172	Petoumenou, D. G.	2021	10.3390/plants10050907	grape	Fruits	Csa	Warm temperate	Summer dry	Karitsa	Greece	22.7627	39.8431	3											Loam	Cytolan	SWE	1	Foliar	1	0	2	1.55484	0.256548	1.77903	0.29354	0
1050	172	Petoumenou, D. G.	2021	10.3390/plants10050908	grape	Fruits	Csa	Warm temperate	Summer dry	Karitsa	Greece	22.7627	39.8431	3											Loam	LalVigne	PHs	1	Foliar	1	0	2	1.55484	0.256548	1.71935	0.283694	0
1051	173	Younes, N. A.	2021	10.3390/molecules26092633	onion	Vegetables	BWh	Arid	Desert	Assiut	Egypt	31.2006	27.1759	3		62.4	9.2		356		1.2		7.6		Clay loam	licorice root extract	PE	1	Seed	0.5	1	1	2.976	0.454	9.69	0.946	1
1052	173	Younes, N. A.	2021	10.3390/molecules26092634	onion	Vegetables	BWh	Arid	Desert	Assiut	Egypt	31.2006	27.1759	3		62.4	9.2		356		1.2		7.6		Clay loam	licorice root extract	PE	1	Seed	1	1	1	2.976	0.454	9.238	0.63	1
1053	173	Younes, N. A.	2021	10.3390/molecules26092635	onion	Vegetables	BWh	Arid	Desert	Assiut	Egypt	31.2006	27.1759	3		62.4	9.2		356		1.2		7.6		Clay loam	licorice root extract	PE	1	Seed	0.5	1	1	4.976	0.612	9.667	0.578	1
1054	173	Younes, N. A.	2021	10.3390/molecules26092636	onion	Vegetables	BWh	Arid	Desert	Assiut	Egypt	31.2006	27.1759	3		62.4	9.2		356		1.2		7.6		Clay loam	licorice root extract	PE	1	Seed	1	1	1	4.976	0.612	7.976	0.598	1
1055	173	Younes, N. A.	2021	10.3390/molecules26092637	onion	Vegetables	BWh	Arid	Desert	Assiut	Egypt	31.2006	27.1759	3		62.4	9.2		356		1.2		7.6		Clay loam	licorice root extract	PE	1	Seed	0.5	1	1	3.116	0.128	9.634	0.144	2
1056	173	Younes, N. A.	2021	10.3390/molecules26092638	onion	Vegetables	BWh	Arid	Desert	Assiut	Egypt	31.2006	27.1759	3		62.4	9.2		356		1.2		7.6		Clay loam	licorice root extract	PE	1	Seed	1	1	1	3.116	0.128	9.316	0.152	2
1057	173	Younes, N. A.	2021	10.3390/molecules26092639	onion	Vegetables	BWh	Arid	Desert	Assiut	Egypt	31.2006	27.1759	3		62.4	9.2		356		1.2		7.6		Clay loam	licorice root extract	PE	1	Seed	0.5	1	1	5.052	0.041	9.711	0.092	2
1058	173	Younes, N. A.	2021	10.3390/molecules26092640	onion	Vegetables	BWh	Arid	Desert	Assiut	Egypt	31.2006	27.1759	3		62.4	9.2		356		1.2		7.6		Clay loam	licorice root extract	PE	1	Seed	1	1	1	5.052	0.041	8.065	0.138	2
1059	174	Bavaresco, Luigi	2020	10.1016/j.scienta.2020.109413	grape	Fruits	Cfb	Warm temperate	Fully humid	Piacenza	Italy	9.66653	44.8476	3												Trainer	PHs	1	Foliar	1	0	1	1.67	0.27555	1.92	0.3168	0
1060	174	Bavaresco, Luigi	2020	10.1016/j.scienta.2020.109414	grape	Fruits	Cfb	Warm temperate	Fully humid	Piacenza	Italy	9.66653	44.8476	3												Stimtide	PHs	1	Foliar	1	0	1	1.67	0.27555	1.73	0.28545	0
1061	175	Soppelsa, Sebastian	2020	10.3390/agronomy10081214	apple	Fruits	Dfb	Boreal	Fully humid	Tyrol	Italy	11.2833	46.3667	3												Siliforce	Si	1	Foliar	1	0	6	4.642	0.835	5.054	0.791	0
1062	175	Soppelsa, Sebastian	2020	10.3390/agronomy10081215	apple	Fruits	Dfb	Boreal	Fully humid	Tyrol	Italy	11.2833	46.3667	3												Algavis	SWE	1	Foliar	1	0	6	4.642	0.835	4.978	0.693	0
1063	176	Shah, S.	2017		rape	Others	Cfb	Warm temperate	Fully humid	AgriiFocus	England	-1.65	51.5	3			25		161				8.1				PHs	1	Foliar	1	0	1	0.441	0.0393372	0.461	0.0411212	1
1064	176	Shah, S.	2017		rape	Others	Cfb	Warm temperate	Fully humid	AgriiFocus	England	-1.65	51.5	3			25		161				8.1				PHs	1	Foliar	1	0	1	0.441	0.0393372	0.453	0.0404076	1
1065	176	Shah, S.	2017		rape	Others	Cfb	Warm temperate	Fully humid	AgriiFocus	England	-1.65	51.5	3			25		161				8.1				PHs	1	Foliar	1	1	2	0.441	0.0393372	0.446	0.0397832	1
1066	176	Shah, S.	2017		rape	Others	Cfb	Warm temperate	Fully humid	AgriiFocus	England	-1.65	51.5	3			25		161				8.1				PHs	1	Foliar	0.6	1	2	0.441	0.0393372	0.451	0.0402292	1
1067	176	Shah, S.	2017		rape	Others	Cfb	Warm temperate	Fully humid	AgriiFocus	England	-1.65	51.5	3			25		161				8.1				PHs	1	Foliar	1	1	2	0.441	0.0393372	0.461	0.0411212	1
1068	176	Shah, S.	2017		rape	Others	Cfb	Warm temperate	Fully humid	AgriiFocus	England	-1.65	51.5	3			25		161				8.1				PHs	1	Foliar	1	1	1	0.468	0.0417456	0.485	0.043262	1
1069	176	Shah, S.	2017		rape	Others	Cfb	Warm temperate	Fully humid	AgriiFocus	England	-1.65	51.5	3			25		161				8.1				PHs	1	Foliar	0.5	1	1	0.468	0.0417456	0.485	0.043262	1
1070	176	Shah, S.	2017		wheat	Cereals	Cfb	Warm temperate	Fully humid	AgriiFocus	England	-1.65	51.5	3			21		162				8.2				PHs	1	Foliar	1	0	3	1.489	0.0632825	1.538	0.065365	1
1071	176	Shah, S.	2017		wheat	Cereals	Cfb	Warm temperate	Fully humid	AgriiFocus	England	-1.65	51.5	3			21		162				8.2				Si	1	Foliar	1	0	4	1.489	0.0632825	1.51	0.064175	1
1072	176	Shah, S.	2017		wheat	Cereals	Cfb	Warm temperate	Fully humid	AgriiFocus	England	-1.65	51.5	3			21		162				8.2				PHs	1	Foliar	1	0	5	1.489	0.0632825	1.52	0.0646	1
1073	176	Shah, S.	2017		wheat	Cereals	Cfb	Warm temperate	Fully humid	AgriiFocus	England	-1.65	51.5	3			21		162				8.2				Si	1	Foliar	1	0	5	1.489	0.0632825	1.491	0.0633675	1
1074	176	Shah, S.	2017		wheat	Cereals	Cfb	Warm temperate	Fully humid	AgriiFocus	England	-1.65	51.5	3			21		162				8.2				PHs	1	Foliar	1	0	3	1.489	0.0632825	1.492	0.06341	1
1075	176	Shah, S.	2017		wheat	Cereals	Cfb	Warm temperate	Fully humid	AgriiFocus	England	-1.65	51.5	3			21		162				8.2				PHs	1	Foliar	1	0	3	1.489	0.0632825	1.51	0.064175	1
1076	176	Shah, S.	2017		wheat	Cereals	Cfb	Warm temperate	Fully humid	AgriiFocus	England	-1.65	51.5	3			21		162				8.2				PHs	1	Foliar	1	0	3	1.489	0.0632825	1.499	0.0637075	1
1077	176	Shah, S.	2017		wheat	Cereals	Cfb	Warm temperate	Fully humid	AgriiFocus	England	-1.65	51.5	3			21		162				8.2				PHs	1	Foliar	1	0	3	1.489	0.0632825	1.469	0.0624325	1
1078	176	Shah, S.	2017		rape	Others	Cfb	Warm temperate	Fully humid	AgriiFocus	England	-1.65	51.5	3			36		229				7.9				PHs	1	Foliar	1	1	3	0.345	0.030774	0.359	0.0320228	2
1079	176	Shah, S.	2017		rape	Others	Cfb	Warm temperate	Fully humid	AgriiFocus	England	-1.65	51.5	3			36		229				7.9				PHs	1	Foliar	0.6	1	3	0.345	0.030774	0.369	0.0329148	2
1080	176	Shah, S.	2017		rape	Others	Cfb	Warm temperate	Fully humid	AgriiFocus	England	-1.65	51.5	3			36		229				7.9				PHs	1	Foliar	0.6	1	2	0.345	0.030774	0.35	0.03122	2
1081	176	Shah, S.	2017		rape	Others	Cfb	Warm temperate	Fully humid	AgriiFocus	England	-1.65	51.5	3			36		229				7.9				PHs	1	Foliar	1	1	2	0.345	0.030774	0.365	0.032558	2
1082	176	Shah, S.	2017		rape	Others	Cfb	Warm temperate	Fully humid	AgriiFocus	England	-1.65	51.5	3			36		229				7.9				Si	1	Foliar	1	0	3	0.345	0.030774	0.358	0.0319336	2
1083	176	Shah, S.	2017		wheat	Cereals	Cfb	Warm temperate	Fully humid	AgriiFocus	England	-1.65	51.5	3			23		252				7.8				Si	1	Foliar	1	0	2	1.045	0.0444125	1.15	0.048875	2
1084	176	Shah, S.	2017		wheat	Cereals	Cfb	Warm temperate	Fully humid	AgriiFocus	England	-1.65	51.5	3			23		252				7.8				PHs	1	Foliar	0.4	1	4	1.045	0.0444125	1.051	0.0446675	2
1085	176	Shah, S.	2017		wheat	Cereals	Cfb	Warm temperate	Fully humid	AgriiFocus	England	-1.65	51.5	3			23		252				7.8				PHs	1	Foliar	0.67	1	3	1.045	0.0444125	1.14	0.04845	2
1086	176	Shah, S.	2017		wheat	Cereals	Cfb	Warm temperate	Fully humid	AgriiFocus	England	-1.65	51.5	3			23		252				7.8				PHs	1	Foliar	0.67	1	3	1.045	0.0444125	1.042	0.044285	2
1087	176	Shah, S.	2017		wheat	Cereals	Cfb	Warm temperate	Fully humid	AgriiFocus	England	-1.65	51.5	3			23		252				7.8				PHs	1	Foliar	1	1	3	1.045	0.0444125	1.042	0.044285	2
1088	176	Shah, S.	2017		wheat	Cereals	Cfb	Warm temperate	Fully humid	AgriiFocus	England	-1.65	51.5	3			23		252				7.8				Si	1	Foliar	1	1	3	1.045	0.0444125	1.091	0.0463675	2
1089	176	Shah, S.	2017		wheat	Cereals	Cfb	Warm temperate	Fully humid	AgriiFocus	England	-1.65	51.5	3			23		252				7.8				Si	1	Foliar	0.5	1	3	1.045	0.0444125	1.031	0.0438175	2
1090	177	Kowalska, Jolanta	2021	10.1007/s12633-020-00414-4	wheat	Cereals	Cfb	Warm temperate	Fully humid	Poznan	Poland	17.4	52.2	3			156		193				7.279			Adesil	Si	1	Soil	1	0	1	0.388	0.01649	0.475	0.0201875	0
1091	177	Kowalska, Jolanta	2021	10.1007/s12633-020-00414-5	wheat	Cereals	Cfb	Warm temperate	Fully humid	Poznan	Poland	17.4	52.2	3			156		193				7.279			Adesil	Si	1	Foliar	1	0	2	0.388	0.01649	0.425	0.0180625	0
1092	177	Kowalska, Jolanta	2021	10.1007/s12633-020-00414-6	wheat	Cereals	Cfb	Warm temperate	Fully humid	Poznan	Poland	17.4	52.2	3			156		193				7.279			ZumSil	Si	1	Soil	1	0	1	0.388	0.01649	0.449	0.0190825	0
1093	177	Kowalska, Jolanta	2021	10.1007/s12633-020-00414-7	wheat	Cereals	Cfb	Warm temperate	Fully humid	Poznan	Poland	17.4	52.2	3			156		193				7.279			ZumSil	Si	1	Foliar	1	0	2	0.388	0.01649	0.484	0.02057	0
1094	178	Lobato, María C.	2011	10.1007/s10658-011-9741-2	potato	Root/tuber crops	Cfb	Warm temperate	Fully humid	Balcarce	Argentina	-58.2556	-37.8464	3												Kphi	Phi	1	Foliar	1	0	continuous	1.656	0.157486	2.37	0.225387	1
1095	178	Lobato, María C.	2011	10.1007/s10658-011-9741-3	potato	Root/tuber crops	Cfb	Warm temperate	Fully humid	Balcarce	Argentina	-58.2556	-37.8464	3												Kphi	Phi	1	Foliar	1	0	continuous	4.11	0.390861	3.728	0.354533	2
1096	178	Lobato, María C.	2011	10.1007/s10658-011-9741-4	potato	Root/tuber crops	Cfb	Warm temperate	Fully humid	Balcarce	Argentina	-58.2556	-37.8464	3												Kphi	Phi	1	Foliar	1	0	continuous	2.968	0.282257	3.133	0.297948	3
1097	179	Raposo Junior, Jorge Luiz	2013	10.1080/01904167.2012.748066	sugarcane	Others	Cfa	Warm temperate	Fully humid	Pirassununga	Brazil	-47.4258	-21.9961	3									5.3				Phi	0	Foliar	1	0	1	10.93	0.169415	11.21	0.173755	0
1098	179	Raposo Junior, Jorge Luiz	2013	10.1080/01904167.2012.748067	sugarcane	Others	Cfa	Warm temperate	Fully humid	Pirassununga	Brazil	-47.4258	-21.9961	3									4.9				Phi	0	Foliar	1	0	1	9.29	0.143995	10	0.155	0
1099	179	Raposo Junior, Jorge Luiz	2013	10.1080/01904167.2012.748068	sugarcane	Others	Cfa	Warm temperate	Fully humid	Pirassununga	Brazil	-47.4258	-21.9961	3									4.3				Phi	0	Foliar	1	0	1	8.935	0.138493	9.443	0.146366	0
1100	180	Fichhof, William H	2018	10.5539/jas.v10n10p476	cotton	Others	Aw	Equatorial	Winter dry	Boiadeiro	Brazil	-45.9171	-12.0881	3									7.279		Sand		Si	0	Foliar	1	0	4	0.596175	0.0527019	0.59885	0.0529383	0
1101	180	Fichhof, William H	2018	10.5539/jas.v10n10p477	cotton	Others	Aw	Equatorial	Winter dry	Boiadeiro	Brazil	-45.9171	-12.0881	3									7.279		Sand		Si	0	Foliar	1	0	4	0.596175	0.0527019	0.592237	0.0523538	0
1102	181	Soppelsa,Sebastian	2018	10.3389/fpls.2018.01342	apple	Fruits	Dfb	Boreal	Fully humid	Ora	Italy	11.2833	46.3667	4													HFA	0	Foliar	1	0	1	4.87	0.54	5.14667	0.31	0
1103	181	Soppelsa,Sebastian	2018	10.3389/fpls.2018.01343	apple	Fruits	Dfb	Boreal	Fully humid	Ora	Italy	11.2833	46.3667	4													PHs	0	Foliar	1	0	1	4.87	0.54	4.59667	0.26	0
1104	181	Soppelsa,Sebastian	2018	10.3389/fpls.2018.01344	apple	Fruits	Dfb	Boreal	Fully humid	Ora	Italy	11.2833	46.3667	4													SWE	0	Foliar	1	0	1	4.87	0.54	4.25	0.273333	0
1105	181	Soppelsa,Sebastian	2018	10.3389/fpls.2018.01345	apple	Fruits	Dfb	Boreal	Fully humid	Ora	Italy	11.2833	46.3667	4													SWE	0	Foliar	1	0	1	4.87	0.54	4.66333	0.34	0
1106	181	Soppelsa,Sebastian	2018	10.3389/fpls.2018.01346	apple	Fruits	Dfb	Boreal	Fully humid	Ora	Italy	11.2833	46.3667	4													PHs	0	Foliar	1	0	1	4.87	0.54	4.5	0.293333	0
1107	181	Soppelsa,Sebastian	2018	10.3389/fpls.2018.01347	apple	Fruits	Dfb	Boreal	Fully humid	Ora	Italy	11.2833	46.3667	4													Chi	0	Foliar	1	0	1	4.87	0.54	4.59667	0.453333	0
1108	181	Soppelsa,Sebastian	2018	10.3389/fpls.2018.01348	apple	Fruits	Dfb	Boreal	Fully humid	Ora	Italy	11.2833	46.3667	4													Si	1	Foliar	1	0	1	4.87	0.54	5.17333	0.37	0
